# Supplementary material for: Novel N,N′-Disubstituted Selenoureas as Potential Antioxidant and Cytotoxic Agents
Source: MDPI journal article supplement (doi:10.3390/antiox10050777), 2021-05-14
Supplement: s1 [file s1]

# Novel *N,N'*-Disubstituted selenoureas as Potential Antioxidant and Cytotoxic Agents

Gorka Calvo-Martin <sup>1,2,†</sup>, Daniel Plano <sup>1,2,†</sup>, Ignacio Encío <sup>2,3</sup>, Carmen Sanmartín <sup>1,2,#</sup>

<sup>1</sup> Departamento de Tecnología y Química Farmacéuticas, Universidad de Navarra, Irunlarrea 1, E-31008 Pamplona, Spain

<sup>2</sup> Instituto de Investigación Sanitaria de Navarra (IdiSNA), Irunlarrea, 3, 31008 Pamplona, Spain

<sup>3</sup> Departamento de Ciencias de la Salud, Universidad Pública de Navarra, Avda. Barañain s/n, 31008, Pamplona, Spain

# Correspondence: sanmartin@unav.es; Tel.: +34-948425600 ext. 806388

\* These authors have contributed equally to the manuscript

## Contents:

---

1. Synthesis of *N,N'*-disubstituted selenoureas.
  2. NCI-60 dose-response report for **6c** (Figures S1-S4).
  3. General structure used to assign the chemical shifts in NMR spectroscopy (Figure S5) and characterization of the compounds synthesized in this work.
  4. NMR spectra (<sup>1</sup>H, <sup>13</sup>C and <sup>77</sup>Se) of final products (Figures S6-S80)
  5. Supplementary data for DPPH and ABTS assays (Figures S81-S106).
- 

## 1. SYNTHESIS OF *N,N'*-DISUBSTITUTED SELENOUREAS

### 1.1. Synthesis of the compounds **1a-e**

0.75 mmol (1.5 eq.) of furan-2-ylmethylamine were added over a solution of 0.5 mmol of the selected isoselenocyanate in 5 mL of DCM. The mixture was stirred for one hour. After one hour the solvent was evaporated under vacuum and the resulted oil was precipitated with *n*-hexane. The precipitate was filtered and washed with *n*-hexane.

### 1.2. Synthesis of the compounds **2a-e**

0.84 mmol of thiazol-2-ylmethylamine (1.5 equivalents) were added over a solution of 1 equivalent of the corresponding arylisoselenocyanate dissolved in 10 mL of DCM. The mixture was stirred for 1 hour at RT. After this time the precipitate was filtered and washed with *n*-hexane.

### 1.3. Synthesis of the compounds **3a-e**.

0.6 mmol (1.1 eq) of 6-aminocoumarin were added over a solution of 1 equivalent of the corresponding arylisoselenocyanate in 10 mL of THF and the mixture was stirred for four hours. After this time the solvent was evaporated in a rotary evaporator. The resulted oil was precipitated with a 1:1 mixture of DCM/*n*-Hexane and washed with the same proportion to obtain the selenoureas **4a-e** as yellow powder.

#### 1.4. Synthesis of the compounds **4a-e**

1.5 mmol of butylamine (1.5 eq) were added to a solution of 1 mmol of the corresponding arylisoselenocyanate dissolved in 10 mL of DCM and the mixture was stirred at room temperature for 20 min. After 20 min the solvent was evaporated under reduced pressure and the resulted oil precipitated with *n*-hexane. the precipitate was filtered and washed with *n*-hexane to obtain the products as white powder.

#### 1.5. Synthesis of the compounds **5a-e**.

1.5 mmol of hexylamine (1.5 eq) were added to a solution of 1 mmol of the corresponding arylisoselenocyanate dissolved in 10 mL of DCM and the mixture was stirred at room temperature for 45 min. After 45 min the solvent was evaporated under reduced pressure and the resulted oil precipitated with *n*-hexane. the precipitate was filtered and washed with *n*-hexane to obtain the product as white-pink powder.

#### 1.6. Synthesis of the compounds **6a-e**.

0.7 mmol adamantylamine were added to a solution of 0.7 mmol of the corresponding arylisoselenocyanate in 10 mL of DCM and the mixture was stirred at room temperature for 30 min. The solvent was evaporated under reduced pressure and the resulted oil was precipitated with *n*-hexane. The precipitate was filtered and washed with *n*-hexane to obtain the products as white powder.

## 2. NCI-60 DOSE-RESPONSE REPORT FOR **6c**

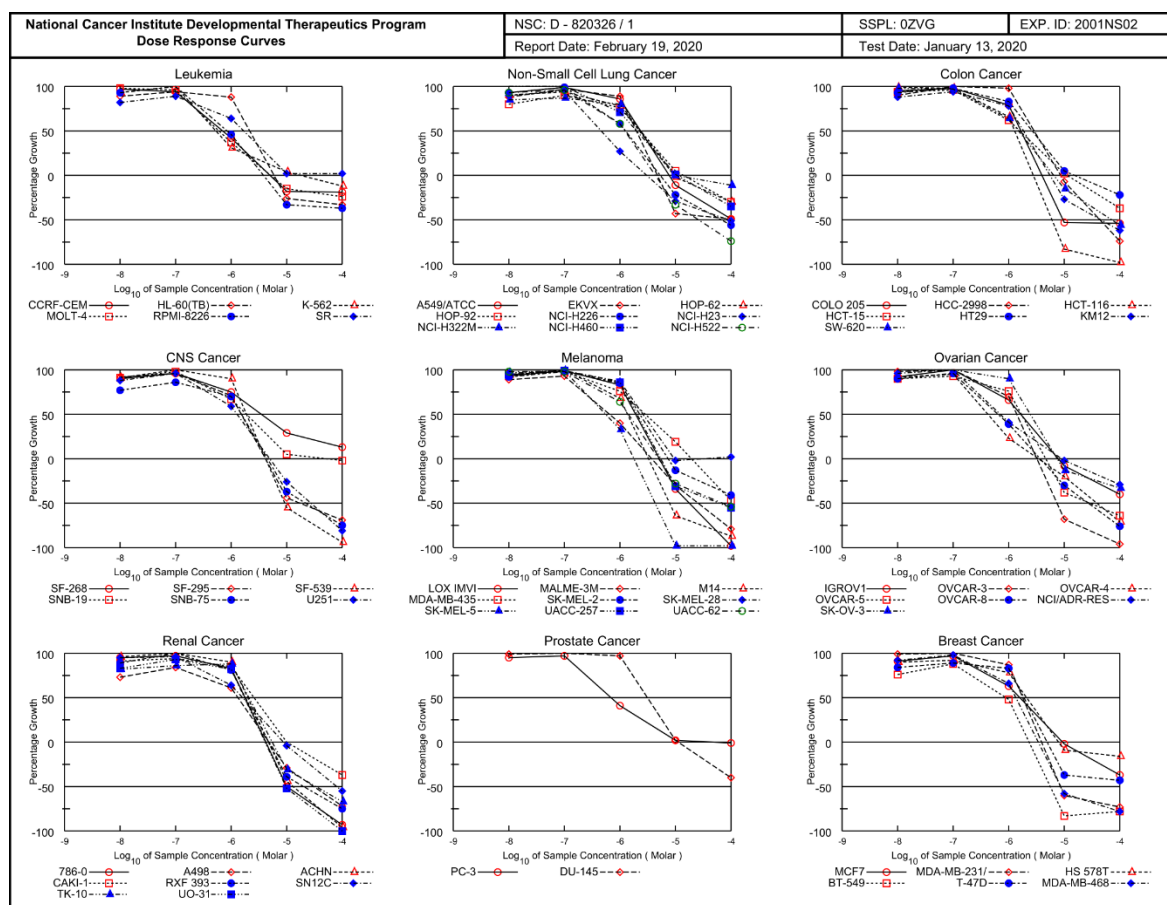

Figure S1. NCI-60 dose-response report for 6c. Page 1 of 4.

| National Cancer Institute Developmental Therapeutics Program<br>In-Vitro Testing Results |           |       |                        |                                       |       |       |       |                |      |                |      |      |               |           |           |  |
|------------------------------------------------------------------------------------------|-----------|-------|------------------------|---------------------------------------|-------|-------|-------|----------------|------|----------------|------|------|---------------|-----------|-----------|--|
| NSC : D - 820326 / 1                                                                     |           |       |                        | Experiment ID : 2001NS02              |       |       |       |                |      | Test Type : 08 |      |      | Units : Molar |           |           |  |
| Report Date : February 19, 2020                                                          |           |       |                        | Test Date : January 13, 2020          |       |       |       |                |      | QNS :          |      |      | MC :          |           |           |  |
| COMI : SU-8c                                                                             |           |       |                        | Stain Reagent : SRB Dual-Pass Related |       |       |       |                |      | SSPL : 0ZVG    |      |      |               |           |           |  |
| Panel/Cell Line                                                                          | Time Zero | Ctrl  | Log10 Concentration    |                                       |       |       |       |                |      |                |      |      | GI50          | TGI       | LC50      |  |
|                                                                                          |           |       | Mean Optical Densities |                                       |       |       |       | Percent Growth |      |                |      |      |               |           |           |  |
|                                                                                          |           |       | -8.0                   | -7.0                                  | -6.0  | -5.0  | -4.0  | -8.0           | -7.0 | -6.0           | -5.0 | -4.0 |               |           |           |  |
| Leukemia                                                                                 |           |       |                        |                                       |       |       |       |                |      |                |      |      |               |           |           |  |
| CCRF-CEM                                                                                 | 0.531     | 2.039 | 1.997                  | 1.945                                 | 1.167 | 0.434 | 0.432 | 97             | 94   | 42             | -18  | -19  | 7.05E-7       | 4.97E-6   | > 1.00E-4 |  |
| HL-60(TB)                                                                                | 0.745     | 2.912 | 2.663                  | 2.792                                 | 2.653 | 0.551 | 0.503 | 89             | 94   | 88             | -26  | -33  | 2.15E-6       | 5.91E-6   | > 1.00E-4 |  |
| K-562                                                                                    | 0.169     | 1.583 | 1.487                  | 1.608                                 | 0.611 | 0.232 | 0.149 | 93             | 102  | 31             | 4    | -12  | 5.42E-7       | 1.88E-5   | > 1.00E-4 |  |
| MOLT-4                                                                                   | 0.633     | 2.859 | 2.813                  | 2.781                                 | 1.465 | 0.536 | 0.483 | 98             | 96   | 37             | -15  | -24  | 6.11E-7       | 5.12E-6   | > 1.00E-4 |  |
| RPMI-8226                                                                                | 1.012     | 2.229 | 2.145                  | 2.284                                 | 1.568 | 0.677 | 0.635 | 93             | 105  | 46             | -33  | -37  | 8.45E-7       | 3.80E-6   | > 1.00E-4 |  |
| SR                                                                                       | 0.291     | 1.632 | 1.393                  | 1.482                                 | 1.145 | 0.318 | 0.315 | 82             | 89   | 64             | 2    | 2    | 1.67E-6       | > 1.00E-4 | > 1.00E-4 |  |
| Non-Small Cell Lung Cancer                                                               |           |       |                        |                                       |       |       |       |                |      |                |      |      |               |           |           |  |
| A549(ATCC                                                                                | 0.483     | 2.628 | 2.488                  | 2.603                                 | 2.337 | 0.432 | 0.249 | 93             | 99   | 86             | -11  | -49  | 2.38E-6       | 7.78E-6   | > 1.00E-4 |  |
| EKVX                                                                                     | 1.070     | 2.124 | 2.001                  | 2.088                                 | 2.006 | 0.614 | 0.545 | 88             | 97   | 89             | -43  | -49  | 1.97E-6       | 4.74E-6   | > 1.00E-4 |  |
| HOP-62                                                                                   | 1.222     | 3.004 | 2.830                  | 2.898                                 | 2.613 | 1.200 | 0.853 | 90             | 94   | 78             | -2   | -30  | 2.24E-6       | 9.49E-6   | > 1.00E-4 |  |
| HOP-92                                                                                   | 1.344     | 1.984 | 1.859                  | 1.919                                 | 1.831 | 1.379 | 0.939 | 80             | 90   | 76             | 5    | -30  | 2.34E-6       | 1.42E-5   | > 1.00E-4 |  |
| NCI-H226                                                                                 | 1.051     | 1.917 | 1.854                  | 1.908                                 | 1.551 | 0.817 | 0.459 | 93             | 99   | 58             | -22  | -56  | 1.25E-6       | 5.26E-6   | 6.50E-5   |  |
| NCI-H23                                                                                  | 0.905     | 2.457 | 2.309                  | 2.376                                 | 1.322 | 0.639 | 0.446 | 90             | 95   | 27             | -29  | -51  | 4.56E-7       | 3.00E-6   | 9.20E-5   |  |
| NCI-H322M                                                                                | 0.998     | 2.348 | 2.140                  | 2.178                                 | 2.080 | 0.989 | 0.888 | 85             | 87   | 80             | .    | -11  | 2.35E-6       | 9.73E-6   | > 1.00E-4 |  |
| NCI-H460                                                                                 | 0.238     | 2.727 | 2.729                  | 2.716                                 | 1.993 | 0.266 | 0.155 | 100            | 100  | 71             | 1    | -35  | 1.98E-6       | 1.07E-5   | > 1.00E-4 |  |
| NCI-H522                                                                                 | 1.289     | 3.194 | 3.052                  | 3.116                                 | 2.396 | 0.866 | 0.332 | 93             | 96   | 58             | -33  | -74  | 1.23E-6       | 4.35E-6   | 2.59E-5   |  |
| Colon Cancer                                                                             |           |       |                        |                                       |       |       |       |                |      |                |      |      |               |           |           |  |
| COLO 205                                                                                 | 0.661     | 2.904 | 2.798                  | 2.862                                 | 2.439 | 0.308 | 0.306 | 95             | 98   | 79             | -53  | -54  | 1.66E-6       | 3.95E-6   | 9.41E-6   |  |
| HCC-2998                                                                                 | 0.510     | 2.002 | 1.853                  | 2.000                                 | 1.975 | 0.472 | 0.132 | 90             | 100  | 98             | -7   | -74  | 2.86E-6       | 8.50E-6   | 4.34E-5   |  |
| HCT-116                                                                                  | 0.288     | 2.286 | 2.276                  | 2.249                                 | 1.607 | 0.050 | 0.005 | 99             | 98   | 66             | -83  | -98  | 1.28E-6       | 2.78E-6   | 6.02E-6   |  |
| HCT-15                                                                                   | 0.299     | 2.249 | 2.133                  | 2.176                                 | 1.504 | 0.333 | 0.187 | 94             | 96   | 62             | 2    | -37  | 1.57E-6       | 1.11E-5   | > 1.00E-4 |  |
| HT29                                                                                     | 0.431     | 2.765 | 2.593                  | 2.727                                 | 2.369 | 0.542 | 0.335 | 93             | 98   | 83             | 5    | -22  | 2.64E-6       | 1.50E-5   | > 1.00E-4 |  |
| KM12                                                                                     | 0.387     | 2.145 | 1.939                  | 2.036                                 | 1.758 | 0.283 | 0.149 | 88             | 94   | 78             | -27  | -62  | 1.85E-6       | 5.54E-6   | 4.63E-5   |  |
| SW-620                                                                                   | 0.414     | 2.600 | 2.558                  | 2.536                                 | 1.815 | 0.352 | 0.181 | 98             | 97   | 64             | -15  | -56  | 1.51E-6       | 6.45E-6   | 7.04E-5   |  |
| CNS Cancer                                                                               |           |       |                        |                                       |       |       |       |                |      |                |      |      |               |           |           |  |
| SF-268                                                                                   | 1.138     | 2.887 | 2.714                  | 2.810                                 | 2.457 | 1.650 | 1.372 | 90             | 96   | 75             | 29   | 13   | 3.55E-6       | > 1.00E-4 | > 1.00E-4 |  |
| SF-295                                                                                   | 0.873     | 3.136 | 2.964                  | 3.043                                 | 2.473 | 0.492 | 0.273 | 92             | 96   | 71             | -44  | -69  | 1.52E-6       | 4.15E-6   | 1.79E-5   |  |
| SF-539                                                                                   | 0.767     | 2.363 | 2.218                  | 2.360                                 | 2.203 | 0.347 | 0.046 | 91             | 100  | 90             | -55  | -94  | 1.89E-6       | 4.18E-6   | 9.27E-6   |  |
| SNB-19                                                                                   | 0.550     | 2.025 | 1.886                  | 1.997                                 | 1.534 | 0.624 | 0.539 | 91             | 98   | 67             | 5    | -2   | 1.86E-6       | 5.06E-5   | > 1.00E-4 |  |
| SNB-75                                                                                   | 0.925     | 1.836 | 1.629                  | 1.707                                 | 1.563 | 0.582 | 0.235 | 77             | 86   | 70             | -37  | -75  | 1.54E-6       | 4.50E-6   | 2.20E-5   |  |
| U251                                                                                     | 0.498     | 2.526 | 2.289                  | 2.440                                 | 1.693 | 0.367 | 0.094 | 88             | 96   | 59             | -26  | -81  | 1.27E-6       | 4.91E-6   | 2.71E-5   |  |
| Melanoma                                                                                 |           |       |                        |                                       |       |       |       |                |      |                |      |      |               |           |           |  |
| LOX IMVI                                                                                 | 0.442     | 2.929 | 2.756                  | 2.901                                 | 2.506 | 0.290 | 0.008 | 93             | 99   | 83             | -34  | -98  | 1.91E-6       | 5.09E-6   | 1.76E-5   |  |
| MALME-3M                                                                                 | 0.724     | 1.798 | 1.679                  | 1.723                                 | 1.156 | 0.507 | 0.155 | 89             | 93   | 40             | -30  | -79  | 6.53E-7       | 3.74E-6   | 2.58E-5   |  |
| M14                                                                                      | 0.411     | 1.112 | 1.068                  | 1.130                                 | 0.889 | 0.149 | 0.055 | 94             | 103  | 68             | -64  | -87  | 1.37E-6       | 3.29E-6   | 7.87E-6   |  |
| MDA-MB-435                                                                               | 0.640     | 2.928 | 2.807                  | 2.883                                 | 2.368 | 1.079 | 0.341 | 95             | 98   | 76             | 19   | -47  | 2.84E-6       | 1.95E-5   | > 1.00E-4 |  |
| SK-MEL-2                                                                                 | 1.185     | 2.793 | 2.662                  | 2.765                                 | 2.554 | 1.028 | 0.700 | 92             | 98   | 85             | -13  | -41  | 2.27E-6       | 7.33E-6   | > 1.00E-4 |  |
| SK-MEL-28                                                                                | 0.964     | 2.673 | 2.610                  | 2.657                                 | 2.454 | 0.948 | 0.993 | 96             | 99   | 87             | -2   | 2    | 2.62E-6       | .         | > 1.00E-4 |  |
| SK-MEL-5                                                                                 | 1.104     | 3.173 | 3.108                  | 3.163                                 | 1.791 | 0.022 | 0.025 | 97             | 99   | 33             | -98  | -98  | 5.58E-7       | 1.79E-6   | 4.30E-6   |  |
| UACC-257                                                                                 | 1.261     | 2.841 | 2.750                  | 2.831                                 | 2.620 | 0.871 | 0.563 | 94             | 99   | 86             | -31  | -55  | 2.03E-6       | 5.44E-6   | 6.03E-5   |  |
| UACC-62                                                                                  | 0.982     | 2.891 | 2.861                  | 2.862                                 | 2.210 | 0.706 | 0.456 | 98             | 98   | 64             | -28  | -54  | 1.43E-6       | 4.96E-6   | 7.24E-5   |  |
| Ovarian Cancer                                                                           |           |       |                        |                                       |       |       |       |                |      |                |      |      |               |           |           |  |
| IGROV1                                                                                   | 0.568     | 2.312 | 2.173                  | 2.325                                 | 1.717 | 0.520 | 0.342 | 92             | 101  | 66             | -8   | -40  | 1.64E-6       | 7.70E-6   | > 1.00E-4 |  |
| OVCAR-3                                                                                  | 0.585     | 1.920 | 1.894                  | 1.943                                 | 1.516 | 0.189 | 0.024 | 98             | 102  | 70             | -68  | -96  | 1.39E-6       | 3.21E-6   | 7.42E-6   |  |
| OVCAR-4                                                                                  | 0.681     | 1.750 | 1.661                  | 1.694                                 | 0.927 | 0.548 | 0.195 | 92             | 95   | 23             | -20  | -71  | 4.20E-7       | 3.46E-6   | 3.87E-5   |  |
| OVCAR-5                                                                                  | 0.534     | 1.401 | 1.318                  | 1.337                                 | 1.197 | 0.333 | 0.194 | 90             | 93   | 76             | -38  | -64  | 1.70E-6       | 4.68E-6   | 2.97E-5   |  |
| OVCAR-8                                                                                  | 0.413     | 2.133 | 1.961                  | 2.059                                 | 1.089 | 0.291 | 0.100 | 90             | 96   | 39             | -30  | -76  | 6.45E-7       | 3.71E-6   | 2.76E-5   |  |
| NCI/ADR-RES                                                                              | 0.583     | 2.214 | 2.156                  | 2.235                                 | 1.253 | 0.570 | 0.413 | 96             | 101  | 41             | -2   | -29  | 7.11E-7       | 8.88E-6   | > 1.00E-4 |  |
| SK-OV-3                                                                                  | 1.100     | 2.585 | 2.583                  | 2.611                                 | 2.440 | 0.953 | 0.736 | 100            | 102  | 90             | -13  | -33  | 2.45E-6       | 7.43E-6   | > 1.00E-4 |  |
| Renal Cancer                                                                             |           |       |                        |                                       |       |       |       |                |      |                |      |      |               |           |           |  |
| 786-0                                                                                    | 0.762     | 2.636 | 2.544                  | 2.572                                 | 2.323 | 0.381 | 0.053 | 95             | 97   | 83             | -50  | -93  | 1.78E-6       | 4.22E-6   | 1.00E-5   |  |
| A498                                                                                     | 1.775     | 2.641 | 2.406                  | 2.504                                 | 2.303 | 1.259 | 0.496 | 73             | 84   | 61             | -29  | -72  | 1.32E-6       | 4.75E-6   | 3.07E-5   |  |
| ACHN                                                                                     | 0.340     | 1.501 | 1.456                  | 1.536                                 | 1.383 | 0.192 | 0.015 | 96             | 103  | 90             | -44  | -96  | 1.99E-6       | 4.71E-6   | 1.32E-5   |  |
| CAKI-1                                                                                   | 0.741     | 2.518 | 2.364                  | 2.413                                 | 2.243 | 0.747 | 0.464 | 91             | 94   | 85             | .    | -37  | 2.57E-6       | 1.02E-5   | > 1.00E-4 |  |
| RXF 393                                                                                  | 1.312     | 2.008 | 1.930                  | 2.025                                 | 1.874 | 0.800 | 0.334 | 89             | 102  | 81             | -39  | -75  | 1.80E-6       | 4.72E-6   | 2.03E-5   |  |
| SN12C                                                                                    | 0.644     | 2.550 | 2.454                  | 2.477                                 | 1.862 | 0.620 | 0.290 | 95             | 96   | 64             | -4   | -55  | 1.61E-6       | 8.81E-6   | 8.00E-5   |  |
| TK-10                                                                                    | 0.784     | 1.910 | 1.712                  | 1.752                                 | 1.777 | 0.544 | 0.261 | 82             | 86   | 88             | -31  | -67  | 2.10E-6       | 5.52E-6   | 3.44E-5   |  |
| UO-31                                                                                    | 0.902     | 2.031 | 1.841                  | 1.955                                 | 1.828 | 0.437 | 0.003 | 83             | 93   | 82             | -52  | -100 | 1.74E-6       | 4.11E-6   | 9.74E-6   |  |
| Prostate Cancer                                                                          |           |       |                        |                                       |       |       |       |                |      |                |      |      |               |           |           |  |
| PC-3                                                                                     | 0.542     | 2.056 | 1.978                  | 2.014                                 | 1.166 | 0.565 | 0.534 | 95             | 97   | 41             | 2    | -1   | 6.96E-7       | 3.21E-5   | > 1.00E-4 |  |
| DU-145                                                                                   | 0.762     | 2.517 | 2.493                  | 2.572                                 | 2.464 | 0.799 | 0.458 | 99             | 103  | 97             | 2    | -40  | 3.13E-6       | 1.12E-5   | > 1.00E-4 |  |
| Breast Cancer                                                                            |           |       |                        |                                       |       |       |       |                |      |                |      |      |               |           |           |  |
| MCF7                                                                                     | 0.288     | 1.785 | 1.657                  | 1.737                                 | 1.225 | 0.283 | 0.182 | 91             | 97   | 63             | -2   | -37  | 1.57E-6       | 9.40E-6   | > 1.00E-4 |  |
| MDA-MB-231/ATCC                                                                          | 0.730     | 1.657 | 1.650                  | 1.719                                 | 1.538 | 0.292 | 0.200 | 99             | 107  | 87             | -60  | -73  | 1.79E-6       | 3.91E-6   | 8.55E-6   |  |
| HS 578T                                                                                  | 1.059     | 2.292 | 2.168                  | 2.194                                 | 2.015 | 0.965 | 0.893 | 90             | 92   | 78             | -9   | -16  | 2.08E-6       | 7.89E-6   | > 1.00E-4 |  |
| BT-549                                                                                   | 0.955     | 2.092 | 1.821                  | 1.951                                 | 1.497 | 0.163 | 0.212 | 76             | 88   | 48             | -83  | -78  | 8.74E-7       | 2.32E-6   | 5.60E-6   |  |
| T-47D                                                                                    | 1.039     | 2.473 | 2.244                  | 2.318                                 | 2.229 | 0.650 | 0.597 | 84             | 89   | 83             | -37  | -43  | 1.88E-6       | 4.89E-6   | > 1.00E-4 |  |
| MDA-MB-468                                                                               | 0.864     | 1.838 | 1.759                  | 1.818                                 | 1.509 | 0.366 | 0.187 | 92             | 98   | 66             | -58  | -78  | 1.35E-6       | 3.42E-6   | 8.68E-6   |  |

Figure S2. NCI-60 dose-response report for 6c. Page 2 of 4.

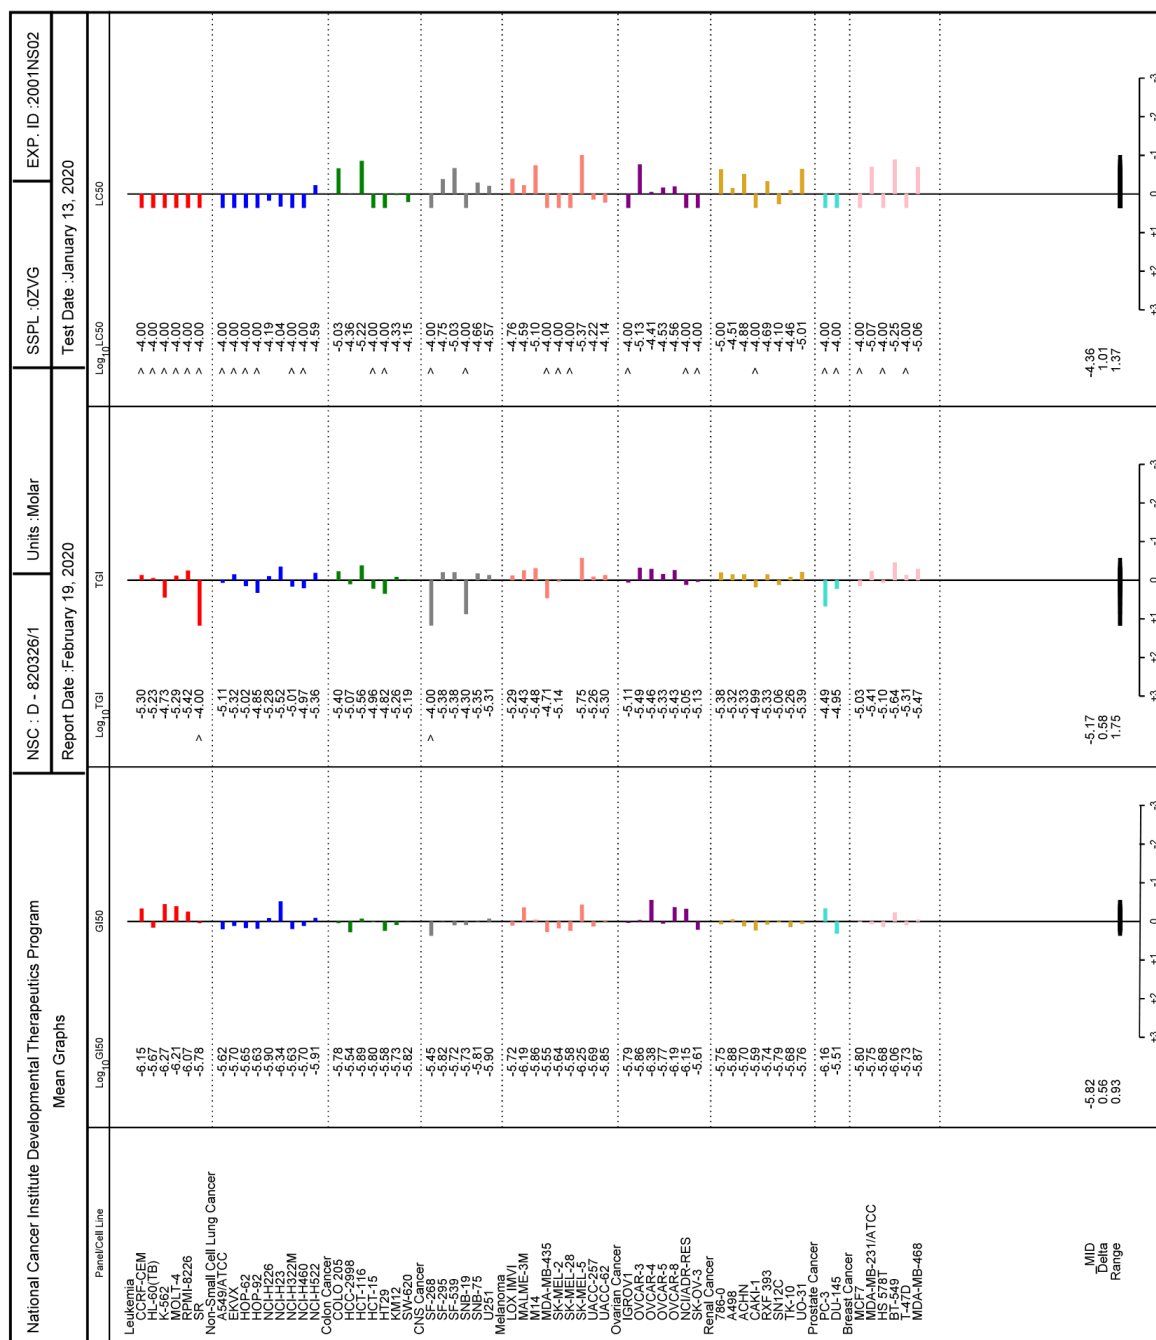

Figure S3. NCI-60 dose-response report for 6c. Page 3 of 4.

**Figure S4.** NCI-60 dose-response report for **6c**. Page 4 of 4.

### 3. GENERAL STRUCTURE USED TO ASSIGN THE CHEMICAL SHIFTS IN NMR SPECTROSCOPY

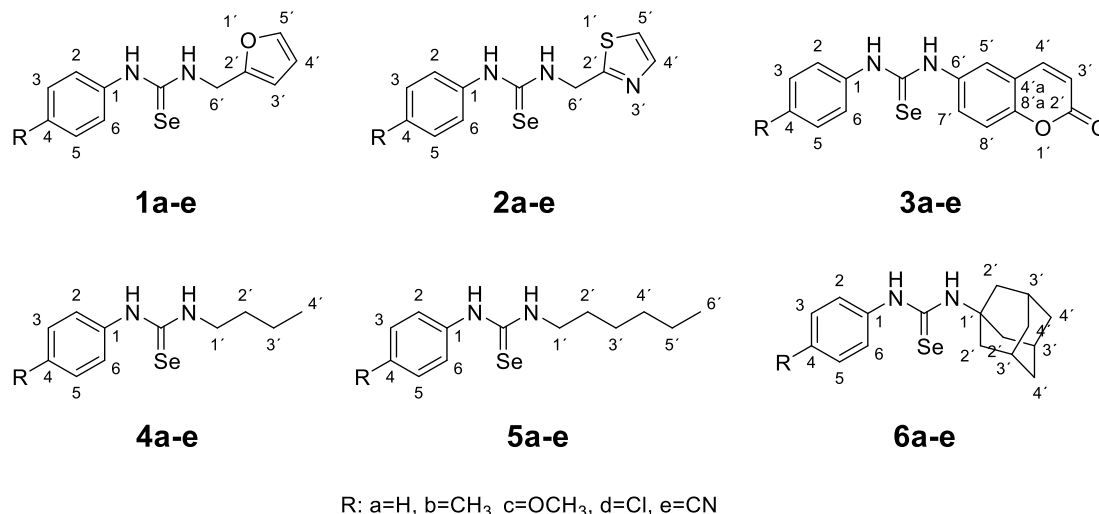

**Figure S5.** General structure of the new *N,N'*-disubstituted selenoureas.

*N'*-(furan-2-ylmethyl)-*N*-phenylselenourea (**1a**). Yield 80%, mp 109 °C. IR (KBr)  $\bar{\nu}$  cm<sup>-1</sup>: 3262 (N-H), 3141 (N-H), 2993 (C<sub>sp</sub><sup>3</sup>-H). <sup>1</sup>H NMR (400 MHz, CDCl<sub>3</sub>)  $\delta$ : 8.34 (br s, 1H, NH), 7.44 (dd, 2H, J<sub>3-4</sub> = J<sub>5-6</sub> = 7.7 Hz; J<sub>3-2</sub> = J<sub>5-6</sub> = 7.7 Hz; H<sub>3</sub>+H<sub>5</sub>), 7.36 – 7.30 (m, 2H, H<sub>4</sub>+H<sub>6</sub>), 7.21 (d, 2H, H<sub>2</sub>+H<sub>6</sub>), 6.51 (br s, 1H, N'H), 6.31 (d, 2H, J<sub>3'-5'</sub> = J<sub>4'-5'</sub> = 1.3 Hz, H<sub>3</sub>+H<sub>4'</sub>), 4.93 (d, 2H, J<sub>6'-N'H</sub> = 5.1 Hz, H<sub>6'</sub>). <sup>13</sup>C NMR (100 MHz, CDCl<sub>3</sub>)  $\delta$ : 179.3 (C=Se), 149.8 (C<sub>2'</sub>), 142.7 (C<sub>5'</sub>), 135.7 (C<sub>1</sub>), 130.53 (C<sub>3</sub>+C<sub>5</sub>), 128.0 (C<sub>4</sub>), 125.3 (C<sub>2</sub>+C<sub>6</sub>), 110.64 (C<sub>4'</sub>), 108.59 (C<sub>3'</sub>), 45.35 (C<sub>6'</sub>). <sup>77</sup>Se NMR (76 MHz, CDCl<sub>3</sub>)  $\delta$ : 222.2 (Se=C). HRMS calcd. For C<sub>12</sub>H<sub>12</sub>N<sub>2</sub>OSe [M+H]: 281.0188, found 281.0191 [M+H].

*N'*-(furan-2-ylmethyl)-*N*-(4-methyl)phenylselenourea (**1b**). Yield 60%, mp 157 °C. IR (KBr)  $\bar{\nu}$  cm<sup>-1</sup>: 3282 (N-H), 3155 (N-H), 3085 (C<sub>sp</sub><sup>2</sup>-H), 2936 (C<sub>sp</sub><sup>3</sup>-H). <sup>1</sup>H NMR (400 MHz, CDCl<sub>3</sub>)  $\delta$ : 8.17 (br s, 1H, NH), 7.33 (s, 1H, H<sub>5'</sub>), 7.23 (d, 2H, J<sub>3-2</sub> = J<sub>5-6</sub> = 8.1 Hz; H<sub>3</sub>+H<sub>5</sub>), 7.09 (d, 2H, H<sub>2</sub>+H<sub>6</sub>), 6.43 (br s, 1H, N'H), 6.31 (s, 2H, H<sub>3</sub>+H<sub>4'</sub>), 4.92 (d, 2H, J<sub>6'-N'H</sub> = 5.1 Hz, H<sub>6'</sub>), 2.35 (s, 3H, CH<sub>3</sub>-Ph). <sup>13</sup>C NMR (100 MHz, CDCl<sub>3</sub>)  $\delta$ : 179.1 (C=Se), 150.0 (C<sub>2'</sub>), 142.6 (C<sub>5'</sub>), 138.3 (C<sub>1</sub>), 132.9 (C<sub>4</sub>), 131.1 (C<sub>3</sub>+C<sub>5</sub>), 125.5 (C<sub>2</sub>+C<sub>6</sub>), 110.6 (C<sub>4'</sub>), 108.5 (C<sub>3'</sub>), 45.5 (C<sub>6'</sub>), 21.2 (CH<sub>3</sub>-Ph). HRMS calcd. For C<sub>13</sub>H<sub>14</sub>N<sub>2</sub>OSe [M+H]: 295.0344, found 295.0349 [M+H].

*N'*-(furan-2-ylmethyl)-*N*-(4-methoxy)phenylselenourea (**1c**). Yield 86%, mp 128 °C. IR (KBr)  $\bar{\nu}$  cm<sup>-1</sup>: 3322 (N-H), 3171 (N-H), 2963 (C<sub>sp</sub><sup>3</sup>-H). <sup>1</sup>H NMR (400 MHz, CDCl<sub>3</sub>)  $\delta$ : 8.30 (s, 1H, NH), 7.32 (dd, 1H, J<sub>5'-3'</sub> = 1.7 Hz, J<sub>5'-4'</sub> = 0.9 Hz, H<sub>5'</sub>), 7.14 (d, 2H, J<sub>2-3</sub> = J<sub>6-5</sub> = 8.8 Hz, H<sub>2</sub>+H<sub>6</sub>), 6.92 (d, 2H, H<sub>3</sub>+H<sub>5</sub>), 6.41 – 6.24 (m, 3H, NH+H<sub>3</sub>+H<sub>4'</sub>), 4.90 (d, 2H, J<sub>6'-N'H</sub> = 5.2 Hz, H<sub>6'</sub>), 3.80 (s, 3H, OCH<sub>3</sub>). <sup>13</sup>C NMR (100 MHz, CDCl<sub>3</sub>)  $\delta$ : 179.7 (C=Se), 159.4 (C<sub>4</sub>), 150.0 (C<sub>2'</sub>), 142.6 (C<sub>5'</sub>), 128.0 (C<sub>1</sub>), 127.6 (C<sub>2</sub>+C<sub>6</sub>), 115.6 (C<sub>3</sub>+C<sub>5</sub>), 110.6 (C<sub>4'</sub>), 108.5 (C<sub>3'</sub>), 55.7 (OCH<sub>3</sub>), 45.3 (C<sub>1'</sub>). <sup>77</sup>Se NMR (76 MHz, CDCl<sub>3</sub>)  $\delta$ : 206.7 (Se=C). HRMS calcd. For C<sub>13</sub>H<sub>14</sub>N<sub>2</sub>O<sub>2</sub>Se [M+H]: 311.0293, found 311.0284 [M+H].

*N'*-(furan-2-ylmethyl)-*N*-(4-chloro)phenylselenourea (**1d**). Yield 79%, mp 128 °C. IR (KBr)  $\bar{\nu}$  cm<sup>-1</sup>: 3357 (N-H), 3152 (N-H), 3033 (C<sub>sp</sub><sup>2</sup>-H). <sup>1</sup>H NMR (400 MHz, CDCl<sub>3</sub>)  $\delta$ : 8.78 (s, 1H, NH), 7.38 (d, 2H, J<sub>3-2</sub> = J<sub>5-6</sub> = 8.7 Hz, H<sub>3</sub>+H<sub>5</sub>), 7.35 – 7.31 (m, 1H, H<sub>5'</sub>), 7.17 (d, 2H, H<sub>2</sub>+H<sub>6</sub>), 6.47 (br s, 1H, N'H), 6.31 (d, 2H, H<sub>3</sub>+H<sub>4'</sub>), 4.90 (d, 2H, J<sub>6'-N'</sub> = 4.6 Hz, H<sub>6'</sub>). <sup>13</sup>C NMR (100 MHz, CDCl<sub>3</sub>)  $\delta$ : 179.4 (C=Se), 149.6 (C<sub>2'</sub>), 142.8 (C<sub>5'</sub>), 134.3 (C<sub>1</sub>), 133.6 (C<sub>4</sub>), 130.6 (C<sub>3</sub>+C<sub>5</sub>), 126.7 (C<sub>2</sub>+C<sub>6</sub>), 110.7 (C<sub>4'</sub>), 108.8 (C<sub>3'</sub>), 45.3 (C<sub>6'</sub>). <sup>77</sup>Se NMR (76 MHz, CDCl<sub>3</sub>)  $\delta$ : 229.3 (Se=C). HRMS calcd. For C<sub>12</sub>H<sub>11</sub>N<sub>2</sub>OSeCl [M+H]: 314.9798, found 314.9789 [M+H].

*N'-(furan-2-ylmethyl)-N-(4-cyano)phenylselenourea (1e)*. Yield 79%, mp 128°C. IR (KBr)  $\bar{\nu}$  cm<sup>-1</sup>: 3353 (N-H), 3166 (N-H), 3052 (C<sub>sp2</sub>-H), 2982 (C<sub>sp3</sub>-H), 2226 (C≡N). <sup>1</sup>H NMR (400 MHz, DMSO)  $\delta$ : 10.33 (br s, 1H, NH), 9.03 (br s, 1H, N'H), 7.78 (d, 2H, J<sub>3-2</sub>=J<sub>5-6</sub>= 8.8 Hz, H<sub>3</sub>+H<sub>5</sub>), 7.68 (d, 2H, H<sub>2</sub>+H<sub>6</sub>), 7.65 - 7.60 (m, 1H, H<sub>5'</sub>), 6.43 (dd, 1H, J<sub>4'-3'</sub> = 3.1 Hz, J<sub>4'-5'</sub> = 1.9 Hz, H<sub>4'</sub>), 6.39 (d, 1H, H<sub>3'</sub>), 4.84 (d, 2H, J<sub>6'-NH</sub> = 1.4 Hz, H<sub>6'</sub>). <sup>13</sup>C NMR (100 MHz, DMSO)  $\delta$  180.3 (C=Se), 150.7 (C<sub>2'</sub>), 143.7 (C<sub>1</sub>), 142.4 (C<sub>5'</sub>), 132.9 (C<sub>3</sub>+C<sub>5</sub>), 122.7 (C<sub>2</sub>+C<sub>6</sub>), 118.9 (C<sub>4</sub>), 110.5 (C<sub>4'</sub>), 107.9 (C<sub>3'</sub>), 105.9 (CN), 43.5 (C<sub>6'</sub>). <sup>77</sup>Se NMR (76 MHz, CDCl<sub>3</sub>)  $\delta$ : 251.53 (Se=C). HRMS calcd. For C<sub>13</sub>H<sub>11</sub>N<sub>3</sub>OSe [M+H]: 306.0140, found 306.0153 [M+H].

*N'-(thiazol-2-ylmethyl)-N-phenylselenourea (2a)*. Yield 65%, mp 149°C. IR (KBr)  $\bar{\nu}$  cm<sup>-1</sup>: 3131 (N-H), 3048 (C<sub>sp2</sub>-H), 2969 (C<sub>sp3</sub>-H). <sup>1</sup>H NMR (400 MHz, DMSO)  $\delta$ : 10.30 (br s, 1H, NH), 8.74 (br s, 1H, N'H), 7.74 (d, 1H, J<sub>4'-5'</sub> = 3.2 Hz, H<sub>4'</sub>), 7.63 (d, 1H, H<sub>5'</sub>), 7.39 (t, 2H, J = 7.7 Hz, H<sub>3</sub>+H<sub>5</sub>), 7.33 (d, 2H, J<sub>2-3</sub>=J<sub>6-5</sub>=7.3 Hz, H<sub>2</sub>+H<sub>6</sub>), 7.23 (t, 1H, J<sub>4-3</sub>=J<sub>4-5</sub>= 7.2 Hz, H<sub>4</sub>), 5.14 (d, 2H J<sub>6'-N'</sub> = 4.0 Hz, H<sub>6'</sub>). <sup>13</sup>C NMR (101 MHz, DMSO)  $\delta$ : 178.0 (C=Se), 168.6 (C<sub>2'</sub>), 142.0 (C<sub>4'</sub>), 138.2 (C<sub>1</sub>), 129.14 (C<sub>3</sub>+C<sub>5</sub>), 125.7 (C<sub>4</sub>), 124.6 (C<sub>2</sub>+C<sub>6</sub>), 119.9 (C<sub>5'</sub>), 48.5 (C<sub>6'</sub>). <sup>77</sup>Se NMR (76 MHz, DMSO)  $\delta$ : 219.4 (C=Se). HRMS calcd. For C<sub>11</sub>H<sub>11</sub>N<sub>3</sub>Se [M+H]: 297.9912, found 297.9915 [M+H].

*N'-(thiazol-2-ylmethyl)-N-(4-methyl)phenylselenourea (2b)*. Yield 58%, mp 154 °C. IR (KBr)  $\bar{\nu}$  cm<sup>-1</sup>: 3253 (N-H), 3205 (N-H), 2976 (C<sub>sp3</sub>-H). <sup>1</sup>H NMR (400 MHz, DMSO)  $\delta$ : 10.20 (br s, 1H, NH), 8.61 (br s, 1H, NH), 7.73 (d, 1H, J<sub>4'-5'</sub> = 3.2 Hz; H<sub>4'</sub>), 7.62 (d, 1H, H<sub>5'</sub>), 7.19 (s, 4H, H<sub>2</sub>+H<sub>3</sub>+H<sub>5</sub>+H<sub>6</sub>), 5.12 (d, 2H J<sub>6'-N'H</sub> = 4.5 Hz; 2H), 2.29 (s, 3H, CH<sub>3</sub>-Ph). <sup>13</sup>C NMR (101 MHz, DMSO)  $\delta$ : 179.8 (C=Se), 168.8 (C<sub>2'</sub>), 142.0 (C<sub>4'</sub>), 135.4 (C<sub>1</sub>), 135.2 (C<sub>4</sub>), 129.6 (C<sub>3</sub>+C<sub>5</sub>), 124.8 (C<sub>2</sub>+C<sub>6</sub>), 119.8 (C<sub>5'</sub>), 48.5 (C<sub>6'</sub>), 20.5 (CH<sub>3</sub>-Ph). <sup>77</sup>Se NMR (76 MHz, DMSO)  $\delta$ : 213.4 (C=Se). HRMS calcd. For C<sub>12</sub>H<sub>13</sub>N<sub>3</sub>SSe [M+H]: 312.0068, found 312.0099 [M+H].

*N'-(thiazol-2-ylmethyl)-N-(4-methoxy)phenylselenourea (2c)*. Yield 62%, mp 150 °C. IR (KBr)  $\bar{\nu}$  cm<sup>-1</sup>: 3191 (N-H), 2957 (C<sub>sp3</sub>-H). <sup>1</sup>H NMR (400 MHz, DMSO)  $\delta$ : 10.11 (br s, 1H, NH), 8.51 (br s, 1H, N'H), 7.72 (d, 1H, J<sub>4'-5'</sub> = 3.3 Hz, H<sub>4'</sub>), 7.61 (d, 1H, H<sub>5'</sub>), 7.19 (d, 2H, J<sub>3-2</sub>=J<sub>5-6</sub>= 8.9 Hz, H<sub>3</sub>+H<sub>5</sub>), 6.96 (d, 2H, H<sub>2</sub>+H<sub>6</sub>), 5.10 (d, 2H, J<sub>6'-N'H</sub> = 5.1 Hz, H<sub>6'</sub>), 3.75 (s, 3H, OCH<sub>3</sub>). <sup>13</sup>C NMR (101 MHz, DMSO)  $\delta$  1780.0 (C=Se), 169.0 (C<sub>2'</sub>), 157.5 (C<sub>1</sub>), 142.0 (C<sub>4'</sub>), 130.6 (C<sub>4</sub>), 126.9 (C<sub>3</sub>+C<sub>5</sub>), 119.8 (C<sub>5'</sub>), 114.4 (C<sub>2</sub>+C<sub>6</sub>), 55.3 (OCH<sub>3</sub>), 48.5 (C<sub>6'</sub>). HRMS calcd. For C<sub>12</sub>H<sub>13</sub>N<sub>3</sub>OSse [M+H]: 328.0017, found 328.0082 [M+H].

*N'-(thiazol-2-ylmethyl)-N-(4-chloro)phenylselenourea (2d)*. Yield 76%, mp 165 °C. IR (KBr)  $\bar{\nu}$  cm<sup>-1</sup>: 3266 (N-H), 3191 (N-H), 3089 (C<sub>sp2</sub>-H), 2975 (C<sub>sp3</sub>-H). <sup>1</sup>H NMR (400 MHz, DMSO)  $\delta$ : 10.31 (br s, 1H, NH), 8.85 (br s, 1H, NH), 7.74 (d, 1H, J<sub>4'-5'</sub> = 3.2 Hz; H<sub>4'</sub>), 7.63 (d, 1H, H<sub>5'</sub>), 7.44 (d, 2H, J<sub>3-2</sub> = J<sub>5-6</sub> = 8.7 Hz; H<sub>3</sub>+H<sub>5</sub>), 7.37 (d, 2H, H<sub>2</sub>+H<sub>6</sub>), 5.13 (s, 2H, H<sub>6'</sub>). <sup>13</sup>C NMR (101 MHz, DMSO)  $\delta$ : 180.5 (C=Se), 168.3 (C<sub>2'</sub>), 142.0 (C<sub>4'</sub>), 137.4 (C<sub>1</sub>), 129.7 (C<sub>4</sub>), 128.9 (C<sub>3</sub>+C<sub>5</sub>), 126.3 (C<sub>2</sub>+C<sub>6</sub>), 120.0 (C<sub>5'</sub>), 48.4 (C<sub>6'</sub>). <sup>77</sup>Se NMR (76 MHz, DMSO)  $\delta$ : 224.0 (C=Se). HRMS calcd. For C<sub>11</sub>H<sub>10</sub>N<sub>3</sub>SSeCl [M+H]: 331.9522, found 331.9517 [M+H].

*N'-(thiazol-2-ylmethyl)-N-(4-cyano)phenylselenourea (2e)*. Yield 68%, mp 152°C. IR (KBr)  $\bar{\nu}$  cm<sup>-1</sup>: 3199 (N-H), 2924 (C<sub>sp3</sub>-H), 2225 (C≡N). <sup>1</sup>H NMR (400 MHz, DMSO)  $\delta$ : 10.44 (br s, 1H, NH), 9.30 (br s, 1H, NH), 7.81 (d, 2H, J<sub>3-2</sub> = J<sub>5-6</sub> = 8.5 Hz; H<sub>3</sub>+H<sub>5</sub>), 7.76 (d, 1H, J<sub>4'-5'</sub> = 3.0 Hz; H<sub>4'</sub>), 7.68 (d, 2H, H<sub>2</sub>+H<sub>6</sub>), 7.65 (d, 1H, H<sub>5'</sub>), 5.17 (s, 2H, H<sub>6'</sub>). <sup>13</sup>C NMR (100 MHz, DMSO)  $\delta$ : 181.4 (C=Se), 167.9 (C<sub>2'</sub>), 143.8 (C<sub>1</sub>), 142.5 (C<sub>4'</sub>), 133.6 (C<sub>3</sub>+C<sub>5</sub>), 123.6 (C<sub>2</sub>+C<sub>6</sub>), 120.7 (C<sub>5'</sub>), 119.4 (C<sub>4</sub>), 106.8 (CN), 48.7 (C<sub>6'</sub>). <sup>77</sup>Se NMR (76 MHz, DMSO)  $\delta$ : 255.5 (C=Se). HRMS calcd. For C<sub>12</sub>H<sub>10</sub>N<sub>4</sub>SSe [M+H]: 322.9864, found 322.9867 [M+H].

*N'-(6-Coumarin)-N-Phenylselenourea (3a)*. Yield 78 %, mp 169°C. IR (KBr)  $\bar{\nu}$  cm<sup>-1</sup>: 3273 (N-H), 3153 (N-H), 1729 (C=O). <sup>1</sup>H NMR (400 MHz, DMSO)  $\delta$ : 10.27 (br s, 1H, NH), 10.21 (br s, 1H, NH), 8.07 (d, 1H, J<sub>H4'-H3'</sub> = 9.6 Hz; H<sub>4'</sub>), 7.73 (d, 1H, J<sub>H7'-H8'</sub> = 2.3 Hz; H<sub>7'</sub>), 7.60 (dd, 1H, J<sub>H8'-H5'</sub> = 8.8 Hz; J<sub>H8'-H7'</sub> = 2.3 Hz; H<sub>8'</sub>), 7.44 – 7.32 (m, 5H, H<sub>2</sub>+H<sub>3</sub>+H<sub>5</sub>+H<sub>6</sub>+H<sub>5'</sub>), 7.19 (t, 1H, J<sub>H4-H3,H5</sub> = 7.2 Hz, H<sub>4</sub>), 6.50 (d, 1H, H<sub>3'</sub>). <sup>13</sup>C



NMR (100 MHz, DMSO)  $\delta$ : 179.7 (C=Se), 160.4 (C<sub>2'</sub>), 151.5 (C<sub>8'a</sub>), 144.5 (C<sub>4'</sub>), 139.9 (C<sub>1</sub>), 136.7 (C<sub>6'</sub>), 130.2 (C<sub>8'</sub>), 129.1 (C<sub>3</sub>+C<sub>5</sub>), 125.9 (C<sub>4</sub>), 125.3 (C<sub>2</sub>+C<sub>6</sub>), 125.2 (C<sub>7</sub>), 119.0 (C<sub>4'a</sub>), 116.8 (C<sub>3</sub>+C<sub>5</sub>). HRMS calcd. For C<sub>16</sub>H<sub>12</sub>N<sub>2</sub>O<sub>2</sub>Se [M+H]: 345.0137, found 345.0138 [M+H].

*N'*-(6-Coumarin)-*N*-(4-methylphenyl)selenourea (**3b**). Yield 86 %, mp 145 °C. IR (KBr)  $\bar{\nu}$  cm<sup>-1</sup>: 3278 (N-H), 3100 (N-H), 1720 (C=O). <sup>1</sup>H NMR (400 MHz, DMSO)  $\delta$ : 10.17 (br s, 1H, NH), 10.07 (br s, 1H, N'H), 8.06 (d, 1H, J<sub>H4'-H3'</sub> = 9.6 Hz; H<sub>4'</sub>), 7.72 (d, 1H, J<sub>H7'-H8'</sub> = 2.3 Hz; H<sub>7'</sub>), 7.59 (dd, 1H, J<sub>H8'-H5'</sub> = 8.8 Hz; J<sub>H8'-H7'</sub> = 2.4 Hz; H<sub>8'</sub>), 7.37 (d, 1H, H<sub>5'</sub>), 7.27 (d, 2H, J<sub>H3-H2</sub> = J<sub>H5-H6</sub> = 8.2 Hz; H<sub>3</sub>+H<sub>5</sub>), 7.16 (d, 2H, H<sub>2</sub>+H<sub>6</sub>), 6.49 (d, 1H, H<sub>3'</sub>), 2.29 (s, 3H, CH<sub>3</sub>-Ph). <sup>13</sup>C NMR (100 MHz, DMSO)  $\delta$ : 179.6 (C=Se), 160.4 (C<sub>2'</sub>), 151.5 (C<sub>8'a</sub>), 144.6 (C<sub>4'</sub>), 137.2 (C<sub>1</sub>), 136.8 (C<sub>6'</sub>), 135.3 (C<sub>4</sub>), 130.3 (C<sub>8'</sub>), 129.6 (C<sub>3</sub>+C<sub>5</sub>), 125.4 (C<sub>2</sub>+C<sub>6</sub>), 125.3 (C<sub>7</sub>), 119.0 (C<sub>4'a</sub>), 116.7 (C<sub>3</sub>+C<sub>5'</sub>), 21.0 (CH<sub>3</sub>-Ph). HRMS calcd. For C<sub>17</sub>H<sub>14</sub>N<sub>2</sub>O<sub>2</sub>Se [M+H]: 359.0293, found 359.0293 [M+H].

*N'*-(6-Coumarin)-*N*-(4-methoxyphenyl)selenourea (**3c**). Yield 62 %, mp 159 °C. IR (KBr)  $\bar{\nu}$  cm<sup>-1</sup>: 3264 (N-H), 3118 (N-H), 1717 (C=O). <sup>1</sup>H NMR (400 MHz, DMSO)  $\delta$ : 10.09 (br s, 1H, NH), 9.99 (br s, 1H, N'H), 8.06 (d, 1H, J<sub>H4'-H3'</sub> = 9.6 Hz; H<sub>4'</sub>), 7.71 (s, 1H, H<sub>7'</sub>), 7.59 (d, 1H, J<sub>H8'-H5'</sub> = 8.8 Hz; H<sub>8'</sub>), 7.37 (d, 1H, H<sub>5'</sub>), 7.27 (d, 2H, J<sub>H3-H2</sub> = J<sub>H5-H6</sub> = 8.5 Hz; H<sub>3</sub>+H<sub>5</sub>), 6.92 (d, 2H, H<sub>2</sub>+H<sub>6</sub>), 6.49 (d, 1H, H<sub>3'</sub>), 3.75 (s, 3H, OCH<sub>3</sub>). <sup>13</sup>C NMR (100 MHz, DMSO)  $\delta$ : 179.68 (C=Se), 160.4 (C<sub>2'</sub>), 157.7 (C<sub>4</sub>), 151.5 (C<sub>8'a</sub>), 144.6 (C<sub>4'</sub>), 136.7 (C<sub>6'</sub>), 132.6 (C<sub>1</sub>), 130.3 (C<sub>8'</sub>), 127.4 (C<sub>3</sub>+C<sub>5</sub>), 125.3 (C<sub>7</sub>), 119.0 (C<sub>4'a</sub>), 116.7 (C<sub>3</sub>+C<sub>5'</sub>), 114.4 (C<sub>2</sub>+C<sub>6</sub>), 55.7 (OCH<sub>3</sub>). HRMS calcd. For C<sub>17</sub>H<sub>14</sub>N<sub>2</sub>O<sub>3</sub>Se [M+H]: 375.0242, found 375.0238 [M+H].

*N'*-(6-Coumarin)-*N*-(4-chlorophenyl)selenourea (**3d**). Yield 96 %, mp 156 °C. IR (KBr)  $\bar{\nu}$  cm<sup>-1</sup>: 3280 (N-H), 3109 (N-H), 1716 (C=O). <sup>1</sup>H NMR (400 MHz, DMSO)  $\delta$ : 10.30 (br s, 1H, NH), 10.26 (br s, 1H, N'H), 8.07 (d, 1H, J<sub>H4'-H3'</sub> = 9.3 Hz; H<sub>4'</sub>), 7.73 (s, 1H, H<sub>7'</sub>), 7.60 (d, 1H, J<sub>H8'-H5'</sub> = 7.8 Hz; H<sub>8'</sub>), 7.52-7.35 (m, 5H, H<sub>2</sub>+H<sub>3</sub>+H<sub>5</sub>+H<sub>6</sub>+H<sub>5'</sub>), 6.50 (d, 1H, H<sub>3'</sub>). <sup>13</sup>C NMR (100 MHz, DMSO)  $\delta$ : 180.0 (C=Se), 160.4 (C<sub>2'</sub>), 151.6 (C<sub>8'a</sub>), 144.5 (C<sub>4'</sub>), 139.0 (C<sub>1</sub>), 136.4 (C<sub>6'</sub>), 130.1 (C<sub>8'</sub>), 129.9 (C<sub>4</sub>), 129.0 (C<sub>3</sub>+C<sub>5</sub>), 127.1 (C<sub>2</sub>+C<sub>6</sub>), 125.1 (C<sub>7</sub>), 119.1 (C<sub>4'a</sub>), 116.9 (C<sub>3'</sub>), 116.8 (C<sub>5'</sub>). HRMS calcd. For C<sub>16</sub>H<sub>11</sub>N<sub>2</sub>O<sub>2</sub>SeCl [M+H]: 378.9747, found 378.9763 [M+H].

*N'*-(6-Coumarin)-*N*-(4-cyanophenyl)selenourea (**3e**). Yield 72 %, mp 140 °C. IR (KBr)  $\bar{\nu}$  cm<sup>-1</sup>: 3269 (N-H), 2223 (C≡N), 1727 (C=O). <sup>1</sup>H NMR (400 MHz, DMSO)  $\delta$ : 10.62 (s, 2H, NH+N'H), 8.08 (d, 1H, J<sub>H4'-H3'</sub> = 9.6 Hz; H<sub>4'</sub>), 7.80 (d, 2H, J<sub>H3-H2</sub> = J<sub>H5-H6</sub> = 8.6 Hz; H<sub>3</sub>+H<sub>5</sub>), 7.75 (d, 1H, J<sub>H7'-H8'</sub> = 2.2 Hz; H<sub>7'</sub>), 7.69 (d, 2H, H<sub>2</sub>+H<sub>6</sub>), 7. (dd, 1H, J<sub>H8'-H5'</sub> = 8.8 Hz; J<sub>H8'-H7'</sub> = 2.3 Hz; H<sub>8'</sub>), 7.41 (d, 1H, H<sub>5'</sub>), 6.51 (d, 1H, H<sub>3'</sub>). <sup>13</sup>C NMR (101 MHz, DMSO)  $\delta$ : 179.8 (C=Se), 159.8 (C<sub>2'</sub>), 151.2 (C<sub>8'a</sub>), 144.1 (C<sub>1</sub>), 144.0 (C<sub>4'</sub>), 135.8 (C<sub>6'</sub>), 132.7 (C<sub>3</sub>+C<sub>5</sub>), 129.3 (C<sub>8'</sub>), 124.4 (C<sub>7</sub>), 123.9 (C<sub>2</sub>+C<sub>6</sub>), 118.9 (C<sub>4'a</sub>), 118.7 (C<sub>4</sub>), 116.6 (C<sub>5'</sub>), 116.4 (C<sub>3'</sub>), 106.4 (CN). HRMS calcd. For C<sub>17</sub>H<sub>11</sub>N<sub>3</sub>O<sub>2</sub>Se [M+H]: 370.0089, found 370.0103 [M+H].

*N*-butyl-*N'*-phenylselenourea (**4a**). Yield 82%, mp 69°C. IR (KBr)  $\bar{\nu}$  cm<sup>-1</sup>: 3356 (N-H), 3123 (N-H), 2962 (C<sub>sp3</sub>-H). <sup>1</sup>H NMR (400 MHz, CDCl<sub>3</sub>)  $\delta$ : 8.33 (br s, 1H, NH), 7.44 (dd, 2H, J<sub>3-4</sub> = J<sub>5-4</sub> = 7.7 Hz; J<sub>3-2</sub> = J<sub>5-6</sub> = 7.7 Hz; H<sub>3</sub>+H<sub>5</sub>), 7.33 (t, 1H, H<sub>4</sub>), 7.20 (d, 2H, H<sub>2</sub>+H<sub>6</sub>), 6.23 (br s, 1H, NH), 3.69 (dt, 2H, J<sub>H1'-NH</sub> = 6.3; J<sub>H1'-H2'</sub> = 6.5 Hz; H<sub>1'</sub>), 1.55 (quint, 2H, J = 7.4 Hz; H<sub>2'</sub>), 1.38 – 1.25 (m, 2H, H<sub>3'</sub>), 0.91 (t, 3H, J<sub>H4'-JH3'</sub> = 7.3 Hz; H<sub>4'</sub>). <sup>13</sup>C NMR (100 MHz, CDCl<sub>3</sub>)  $\delta$ : 179.0 (C=Se), 135.8, 130.5, 127.9, 125.4 (aryl), 48.2 (C<sub>1'</sub>), 31.1 (C<sub>2'</sub>), 20.1 (C<sub>3'</sub>), 13.8 (C<sub>4'</sub>).

*N*-butyl-*N'*-(4-methyl)selenourea (**4b**). Yield 81%, mp 46°C. IR (KBr)  $\bar{\nu}$  cm<sup>-1</sup>: 3256 (N-H), 3194 (N-H), 2961 (C<sub>sp3</sub>-H). <sup>1</sup>H NMR (400 MHz, CDCl<sub>3</sub>)  $\delta$ : 8.16 (br s, 1H, NH), 7.23 (d, 2H, J<sub>3-2</sub> = J<sub>5-6</sub> = 8.1 Hz; H<sub>3</sub>+H<sub>5</sub>), 7.08 (d, 2H, H<sub>2</sub>+H<sub>6</sub>), 6.15 (br s, 1H, NH), 3.68 (dt, J<sub>H1'-NH</sub> = 6.3; J<sub>H1'-H2'</sub> = 6.5 Hz; H<sub>1'</sub>), 2.35 (s, 3H, CH<sub>3</sub>-Ph), 1.54 (quint, 2H, J = 7.4 Hz; H<sub>2'</sub>), 1.37 – 1.25 (m, 2H, H<sub>3'</sub>), 0.90 (t, 3H, J<sub>H4'-JH3'</sub> = 7.3 Hz; H<sub>4'</sub>). <sup>13</sup>C NMR (100 MHz, CDCl<sub>3</sub>)  $\delta$ : 178.8 (C=Se), 138.1, 133.0, 131.0, 125.6 (Aryl), 48.2 (C<sub>1'</sub>), 31.2 (C<sub>2'</sub>), 21.2 (CH<sub>3</sub>-Ph), 20.1 (C<sub>3'</sub>), 13.86 (C<sub>4'</sub>).

*N*-butyl-*N'*-(4-methoxyphenyl)selenourea (**4c**). Yield 87%, mp 89°C. IR (KBr)  $\bar{\nu}$  cm<sup>-1</sup>: 3319 (N-H), 3203 (N-H), 3053 (C<sub>sp2</sub>-H), 2955 (C<sub>sp3</sub>-H). <sup>1</sup>H NMR (400 MHz, CDCl<sub>3</sub>)  $\delta$ : 8.07 (br s, 1H, NH), 7.13 (d, 2H, J<sub>3-2</sub> = J<sub>5-6</sub> = 8.8 Hz, H<sub>3</sub>+H<sub>5</sub>), 6.94 (d, 2H, H<sub>2</sub>+H<sub>6</sub>), 6.01 (br s, 1H, NH), 3.81 (s, 3H, OCH<sub>3</sub>), 3.67 (dt, 2H, J<sub>H1'-NH</sub> = 6.3; J<sub>H1'-H2'</sub> = 6.5 Hz, H<sub>1'</sub>), 1.53 (quint, 2H, J = 7.4; H<sub>2'</sub>), 1.36 – 1.22 (m, 2H, H<sub>3'</sub>), 0.90 (t, 3H, J<sub>H4'-H3'</sub> = 7.3 Hz, H<sub>4'</sub>). <sup>13</sup>C NMR (100 MHz, CDCl<sub>3</sub>)  $\delta$ : 179.2 (C=Se), 159.4, 128.1, 127.8, 115.6 (Aryl), 55.7 (OCH<sub>3</sub>), 48.1 (C<sub>1'</sub>), 31.2 (C<sub>2'</sub>), 20.1 (C<sub>3'</sub>), 13.9 (C<sub>4'</sub>).

*N*-butyl-*N'*-(4-chlorophenyl)selenourea (**4d**). Yield 60%, mp 116°C. IR (KBr)  $\bar{\nu}$  cm<sup>-1</sup>: 3229 (N-H), 3127 (N-H), 3051 (C<sub>sp2</sub>-H), 2954 (C<sub>sp3</sub>-H). <sup>1</sup>H NMR (400 MHz, CDCl<sub>3</sub>)  $\delta$ : 8.47 (br s, 1H, NH), 7.41 (d, 2H, J<sub>3-2</sub> = J<sub>5-6</sub> = 8.6 Hz, H<sub>3</sub>+H<sub>5</sub>), 7.16 (d, 2H, H<sub>2</sub>+H<sub>6</sub>), 6.15 (br s, 1H, NH), 3.69 (d, 2H, J<sub>H1'-H2'</sub> = 5.3 Hz, H<sub>1'</sub>), 1.55 (quint, 2H, J = 7.4; H<sub>2'</sub>), 1.47 – 1.14 (m, 2H, H<sub>3'</sub>), 0.92 (t, 3H, J<sub>H4'-H3'</sub> = 7.3 Hz, H<sub>4'</sub>). <sup>13</sup>C NMR (100 MHz, CDCl<sub>3</sub>)  $\delta$ : 179.0 (C=Se), 134.3, 133.6, 130.7, 126.8 (Aryl), 48.2 (C<sub>1'</sub>), 31.1 (C<sub>2'</sub>), 20.1 (C<sub>3'</sub>), 13.9 (C<sub>4'</sub>). HRMS calcd. For C<sub>11</sub>H<sub>15</sub>N<sub>2</sub>SeCl [M+H]: 291.0162, found 291.0158 [M+H].

*N*-butyl-*N'*-(4-cyanophenyl)selenourea (**4e**). Yield 70%, mp 145 °C. IR (KBr)  $\bar{\nu}$  cm<sup>-1</sup>: 3316 (N-H), 3136 (N-H), 2953 (C<sub>sp3</sub>-H), 2229 (C≡N). <sup>1</sup>H NMR (400 MHz, CDCl<sub>3</sub>)  $\delta$ : 8.52 (br s, 1H, NH), 7.72 (d, 2H, J<sub>3-2</sub> = J<sub>5-6</sub> = 8.3 Hz, H<sub>3</sub>+H<sub>5</sub>), 7.33 (br s, 2H, H<sub>2</sub>+H<sub>6</sub>), 6.46 (br s, 1H, NH), 3.73 (br s, 2H, H<sub>1'</sub>), 1.63 (quint, 2H, J = 7.4; H<sub>2'</sub>), 1.38 (m, 2H, H<sub>3'</sub>), 0.95 (t, 3H, J<sub>H4'-H3'</sub> = 7.3 Hz, H<sub>4'</sub>). <sup>13</sup>C NMR (101 MHz, DMSO)  $\delta$ : 179.3 (C=Se), 143.7 (C<sub>1</sub>), 133.1 (C<sub>3</sub>+C<sub>5</sub>), 122.3 (C<sub>2</sub>+C<sub>6</sub>), 119.0 (C<sub>4</sub>), 105.4 (CN), 46.5 (C<sub>1'</sub>), 30.2 (C<sub>2'</sub>), 19.6 (C<sub>3'</sub>), 13.7 (C<sub>4'</sub>). <sup>77</sup>Se NMR (76 MHz, DMSO)  $\delta$ : 249.4 (C=Se). HRMS calcd. For C<sub>11</sub>H<sub>15</sub>N<sub>3</sub>Se [M+H]: 282.0504, found 282.0507 [M+H].

*N*-hexyl-*N'*-phenylselenourea (**5a**). Yield 80%, mp 59°C. IR (KBr)  $\bar{\nu}$  cm<sup>-1</sup>: 3203 (N-H), 3047 (C<sub>sp2</sub>-H), 2956 (C<sub>sp3</sub>-H). <sup>1</sup>H NMR (400 MHz, CDCl<sub>3</sub>)  $\delta$ : 8.24 (br s, 1H, NH), 7.44 (dd, 2H, J<sub>3-4</sub> = J<sub>5-6</sub> = 7.7 Hz; J<sub>3-2</sub> = J<sub>5-6</sub> = 7.7 Hz; H<sub>3</sub>+H<sub>5</sub>), 7.33 (t, 1H, H<sub>4</sub>), 7.21 (d, 2H, H<sub>2</sub>+H<sub>6</sub>), 6.23 (br s, 1H, NH), 3.68 (dt, 2H, J<sub>H1'-NH</sub> = 6.5; J<sub>H1'-H2'</sub> = 6.5 Hz; H<sub>1'</sub>), 1.59-1.54 (m, 2H, H<sub>2'</sub>), 1.32 – 1.22 (m, 6H, H<sub>3</sub>+H<sub>4</sub>+H<sub>5</sub>), 0.86 (t, 3H, J<sub>H6'-H5'</sub> = 6.8 Hz; H<sub>6'</sub>). <sup>13</sup>C NMR (100 MHz, CDCl<sub>3</sub>)  $\delta$ : 178.8 (C=Se), 135.8, 130.5, 128.0, 125.5 (Aryl), 48.5 (C<sub>1'</sub>), 31.47 (C<sub>2'</sub>), 29.0 (C<sub>3'</sub>), 26.6 (C<sub>4'</sub>), 22.6 (C<sub>5'</sub>), 14.0 (C<sub>6'</sub>).

*N*-hexyl-*N'*-(4-methylphenyl)selenourea (**5b**). Yield 85%, mp 88 °C. IR (KBr)  $\bar{\nu}$  cm<sup>-1</sup>: 3232 (N-H), 3058 (C<sub>sp2</sub>-H), 2925 (C<sub>sp3</sub>-H). <sup>1</sup>H NMR (400 MHz, CDCl<sub>3</sub>)  $\delta$ : 8.13 (br s, 1H, NH), 7.23 (d, 2H, J<sub>3-2</sub> = J<sub>5-6</sub> = 8.1 Hz; H<sub>3</sub>+H<sub>5</sub>), 7.08 (d, 2H, H<sub>2</sub>+H<sub>6</sub>), 6.15 (br s, 1H), 3.67 (dt, 2H, J<sub>H1'-NH</sub> = 6.5; J<sub>H1'-H2'</sub> = 6.5 Hz; H<sub>1'</sub>), 2.36 (s, 3H, CH<sub>3</sub>-Ph), 1.58-1.50 (m, 2H, H<sub>2'</sub>), 1.26 (br s, 6H), 0.86 (t, 3H, J<sub>H6'-H5'</sub> = 6.8 Hz; H<sub>6'</sub>). <sup>13</sup>C NMR (100 MHz, CDCl<sub>3</sub>)  $\delta$ : 178.8 (C=Se), 138.1, 132.9, 131.0, 125.5 (aryl), 48.4 (C<sub>1'</sub>), 31.4 (C<sub>2'</sub>), 28.9 (C<sub>3'</sub>), 26.4 (C<sub>4'</sub>), 22.5 (C<sub>5'</sub>), 21.1 (CH<sub>3</sub>-Ph), 13.9 (C<sub>6'</sub>).

*N*-hexyl-*N'*-(4-methoxyphenyl)selenourea (**5c**). Yield 88%, mp 97°C. IR (KBr)  $\bar{\nu}$  cm<sup>-1</sup>: 3202 (N-H), 3054 (C<sub>sp2</sub>-H), 2918 (C<sub>sp3</sub>-H). <sup>1</sup>H NMR (400 MHz, CDCl<sub>3</sub>)  $\delta$ : 8.14 (br s, 1H), 7.13 (d, 2H, J<sub>3-2</sub> = J<sub>5-6</sub> = 8.8 Hz; H<sub>3</sub>+H<sub>5</sub>), 6.93 (d, 2H, H<sub>2</sub>+H<sub>6</sub>), 6.02 (br s, 1H, NH), 3.81 (s, 3H, OCH<sub>3</sub>), 3.65 (dt, 2H, J<sub>H1'-NH</sub> = 6.5; J<sub>H1'-H2'</sub> = 6.7 Hz; H<sub>1'</sub>), 1.60 – 1.49 (m, 2H, H<sub>2'</sub>), 1.25 (br s, 6H, H<sub>3</sub>+H<sub>4</sub>+H<sub>5</sub>), 0.85 (t, J<sub>H6'-H5'</sub> = 6.8 Hz; H<sub>6'</sub>). <sup>13</sup>C NMR (100 MHz, CDCl<sub>3</sub>)  $\delta$ : 179.3 (C=Se), 159.4 (C<sub>4</sub>), 128.3 (C<sub>1</sub>), 127.8 (C<sub>2</sub>+C<sub>6</sub>), 115.6 (C<sub>3</sub>+C<sub>5</sub>), 55.7 (OCH<sub>3</sub>), 48.4 (C<sub>1'</sub>), 31.5 (C<sub>2'</sub>), 29.1 (C<sub>3'</sub>), 26.5 (C<sub>4'</sub>), 22.6 (C<sub>5'</sub>), 14.0 (C<sub>6'</sub>). <sup>77</sup>Se NMR (76 MHz, CDCl<sub>3</sub>)  $\delta$ : 195.6 (C=Se). HRMS calcd. For C<sub>14</sub>H<sub>22</sub>N<sub>2</sub>OSe [M+H]: 315.0970, found 315.0966 [M+H].

*N*-hexyl-*N'*-(4-chlorophenyl)selenourea (**5d**). Yield 60%, mp 110 °C. IR (KBr)  $\bar{\nu}$  cm<sup>-1</sup>: 3226 (N-H), 3050 (C<sub>sp2</sub>-H), 2926 (C<sub>sp3</sub>-H). <sup>1</sup>H NMR (400 MHz, CDCl<sub>3</sub>)  $\delta$ : 8.47 (br s, 1H, NH), 7.40 (d, 2H, J<sub>3-2</sub> = J<sub>5-6</sub> = 8.6 Hz; H<sub>3</sub>+H<sub>5</sub>), 7.16 (d, 2H, H<sub>2</sub>+H<sub>6</sub>), 6.15 (br s, 1H, NH), 3.67 (d, 2H, J<sub>H1'-NH</sub> = 5.2 Hz, H<sub>1'</sub>), 1.62 – 1.51 (m, 2H, H<sub>2'</sub>), 1.27 (br s, 6H, H<sub>3</sub>+H<sub>4</sub>+H<sub>5</sub>), 0.86 (t, J<sub>H6'-H5'</sub> = 6.8 Hz; H<sub>6'</sub>). <sup>13</sup>C NMR (100 MHz, CDCl<sub>3</sub>)  $\delta$ : 178.9 (C=Se), 134.2 133.5, 130.6, 126.7 (Aryl), 48.4 (C<sub>1'</sub>), 31.3 (C<sub>2'</sub>), 28.9 (C<sub>3'</sub>), 26.5 (C<sub>4'</sub>), 22.5 (C<sub>5'</sub>), 13.9 (C<sub>6'</sub>). HRMS calcd. For C<sub>13</sub>H<sub>19</sub>N<sub>2</sub>SeCl [M+H]: 319.0475, found 319.0470 [M+H].

*N*-hexyl-*N'*-(4-cyanophenyl)selenourea (**5e**). Yield 70%, mp 125°C. IR (KBr)  $\bar{\nu}$  cm<sup>-1</sup>: 3312 (N-H), 3137 (N-H), 2927 (C<sub>sp3</sub>-H). <sup>1</sup>H NMR (400 MHz, CDCl<sub>3</sub>)  $\delta$ : 8.95 (br s, 1H, NH), 7.69 (d, 2H, J<sub>3-2</sub> = J<sub>5-6</sub> = 8.6 Hz; H<sub>3</sub>+H<sub>5</sub>), 7.36 (d, 2H, H<sub>2</sub>+H<sub>6</sub>), 6.55 (br s, 1H, NH), 3.70 (s, 2H, H<sub>1</sub>), 1.70 – 1.54 (m, 2H, H<sub>2</sub>'), 1.31 (s, 6H, H<sub>3</sub>' + H<sub>4</sub>' + H<sub>5</sub>'), 0.88 (t, J<sub>H6'-H5'</sub> = 6.7 Hz; H<sub>6</sub>'). <sup>13</sup>C NMR (100 MHz, CDCl<sub>3</sub>)  $\delta$ : 179.0 (C=Se), 140.3, 134.3, 123.9, 118.0 (Aryl), 109.9 (C $\equiv$ N), 48.6 (C<sub>1</sub>'), 31.3 (C<sub>2</sub>'), 28.7 (C<sub>3</sub>'), 26.5 (C<sub>4</sub>'), 22.5 (C<sub>5</sub>'), 13.9 (C<sub>6</sub>'). HRMS calcd. For C<sub>14</sub>H<sub>19</sub>N<sub>3</sub>Se [M+H]: 310.0817, found 310.0837 [M+H].

*N'*-adamantyl-*N*-(phenyl)selenourea (**6a**). Yield 87%, mp 161°C. IR (KBr)  $\bar{\nu}$  cm<sup>-1</sup>: 3355 (N-H), 3152 (C<sub>sp2</sub>-H), 2900 (C<sub>sp3</sub>-H). <sup>1</sup>H NMR (400 MHz, DMSO)  $\delta$ : 9.60 (br s, 1H, NH), 7.49 (br s, 1H, N'H), 7.40 – 7.29 (m, 4H, H<sub>2</sub>+H<sub>3</sub>+H<sub>5</sub>+H<sub>6</sub>), 7.18 – 7.11 (m, 1H, H<sub>4</sub>), 2.28 (s, 6H, H<sub>2</sub>'), 2.06 (s, 3H, H<sub>3</sub>'), 1.64 (s, 6H, H<sub>4</sub>'). <sup>13</sup>C NMR (100 MHz, DMSO)  $\delta$ : 175.8 (C=Se), 139.2 (C<sub>1</sub>), 128.6 (C<sub>2</sub>+C<sub>6</sub>), 125.0 (C<sub>3</sub>+C<sub>5</sub>), 124.7 (C<sub>4</sub>), 54.4 (C<sub>1</sub>'), 40.8 (C<sub>2</sub>'), 35.8 (C<sub>4</sub>'), 29.0 (C<sub>3</sub>'). <sup>77</sup>Se NMR (76 MHz, CDCl<sub>3</sub>)  $\delta$ : 275.4 (C=Se). HRMS calcd. For C<sub>17</sub>H<sub>22</sub>N<sub>2</sub>Se [M+Na]: 357.0841, found 357.0833 [M+Na].

*N'*-adamantyl-*N*-(methylphenyl)selenourea (**6b**). Yield 94%, mp 169°C. IR (KBr)  $\bar{\nu}$  cm<sup>-1</sup>: 3344 (N-H), 3159 (C<sub>sp2</sub>-H), 2909 (C<sub>sp3</sub>-H). <sup>1</sup>H NMR (400 MHz, CDCl<sub>3</sub>)  $\delta$ : 8.12 (br s, 1H, NH), 7.18 (d, 2H, J = 8.2 Hz, H<sub>3</sub>+H<sub>5</sub>), 7.06 (d, 2H, J = 7.8 Hz, H<sub>2</sub>+H<sub>6</sub>), 6.21 (br s, 1H, N'H), 2.31 (s, 3H, Ph-CH<sub>3</sub>), 2.20 (s, 6H, H<sub>2</sub>'), 2.07 (s, 3H, H<sub>3</sub>'), 1.64 (s, 6H, H<sub>4</sub>'). <sup>13</sup>C NMR (100 MHz, CDCl<sub>3</sub>)  $\delta$ : 174.3 (C=Se), 137.6 (C<sub>4</sub>), 133.5 (C<sub>1</sub>), 130.8 (C<sub>3</sub>+C<sub>5</sub>), 125.4 (C<sub>2</sub>+C<sub>6</sub>), 55.5 (Ph-CH<sub>3</sub>), 41.7 (C<sub>2</sub>'), 36.2 (C<sub>4</sub>'), 29.6 (C<sub>3</sub>'), 21.11 (Ph-CH<sub>3</sub>). <sup>77</sup>Se NMR (76 MHz, CDCl<sub>3</sub>)  $\delta$ : 267.0 (C=Se). HRMS calcd. For C<sub>18</sub>H<sub>24</sub>N<sub>2</sub>Se [M+Na]: 371.0998, found 371.0990 [M+Na].

*N'*-adamantyl-*N*-(4-methoxyphenyl)selenourea (**6c**). Yield 84%, mp 165°C. IR (KBr)  $\bar{\nu}$  cm<sup>-1</sup>: 3202 (N-H), 3157 (C<sub>sp2</sub>-H), 2906 (C<sub>sp3</sub>-H). <sup>1</sup>H NMR (400 MHz, DMSO)  $\delta$ : 9.44 (br s, 1H, NH), 7.20 (d, 2H, J<sub>3-2</sub>=J<sub>5-6</sub> = 8.8 Hz, H<sub>3</sub>+H<sub>5</sub>), 6.90 (d, 2H, H<sub>2</sub>+H<sub>6</sub>), 3.74 (s, 3H, OCH<sub>3</sub>), 2.24 (s, 6H, H<sub>2</sub>'), 2.04 (s, 3H, H<sub>3</sub>'), 1.63 (s, 6H, H<sub>4</sub>'). <sup>13</sup>C NMR (100 MHz, DMSO)  $\delta$ : 176.0 (C=Se), 156.9 (C<sub>4</sub>), 131.9 (C<sub>1</sub>), 126.9 (C<sub>3</sub>+C<sub>5</sub>), 113.9 (C<sub>2</sub>+C<sub>6</sub>), 55.2 (OCH<sub>3</sub>), 54.2 (C<sub>1</sub>'), 40.9 (C<sub>2</sub>'), 35.8 (C<sub>4</sub>'), 29.0 (C<sub>3</sub>'). <sup>77</sup>Se NMR (76 MHz, CDCl<sub>3</sub>)  $\delta$ : 259.8 (C=Se). HRMS calcd. For C<sub>18</sub>H<sub>24</sub>N<sub>2</sub>OSe [M+H]: 365.1127, found 365.1171 [M+H].

*N'*-adamantyl-*N*-(4-chlorophenyl)selenourea (**6d**). Yield 76%, mp 177°C. IR (KBr)  $\bar{\nu}$  cm<sup>-1</sup>: 3354 (N-H), 3109 (C<sub>sp2</sub>-H), 2912 (C<sub>sp3</sub>-H). <sup>1</sup>H NMR (400 MHz, DMSO)  $\delta$ : 9.62 (br s, 1H, NH), 7.71 (s, 1H), 7.41 (d, 2H, J = 8.7 Hz, H<sub>2</sub>+H<sub>6</sub>), 7.35 (d, 2H, J = 8.8 Hz, H<sub>3</sub>+H<sub>5</sub>), 2.28 (s, 6H, H<sub>2</sub>'), 2.05 (s, 3H, H<sub>3</sub>'), 1.64 (s, 6H, H<sub>4</sub>'). <sup>13</sup>C NMR (100 MHz, DMSO)  $\delta$ : 176.35 (C=Se), 138.62 (C<sub>1</sub>), 128.51 (C<sub>4</sub>), 128.29 (C<sub>3</sub>+C<sub>5</sub>), 126.07 (C<sub>2</sub>+C<sub>6</sub>), 54.54 (C<sub>1</sub>'), 40.74 (C<sub>2</sub>'), 35.83 (C<sub>4</sub>'), 29.03 (C<sub>3</sub>'). <sup>77</sup>Se NMR (76 MHz, DMSO)  $\delta$ : 277.6 (C=Se). HRMS calcd. For C<sub>17</sub>H<sub>21</sub>N<sub>2</sub>ClSe [M+Na]: 391.0449, found 391.0610 [M+Na].

*N'*-Adamantyl-*N*-(4-cyanophenyl)selenourea (**6e**). Yield 50%. IR (KBr)  $\bar{\nu}$  cm<sup>-1</sup>: 3359 (N-H), 3134 (C<sub>sp2</sub>-H), 2911 (C<sub>sp3</sub>-H). <sup>1</sup>H NMR (400 MHz, DMSO)  $\delta$ : 9.92 (br s, 1H, NH), 8.17 (br s, 1H, NH), 7.73 (d, 2H, J<sub>3-2</sub>=J<sub>5-6</sub> = 8.8 Hz, H<sub>3</sub>+H<sub>5</sub>), 7.68 (d, 2H, H<sub>2</sub>+H<sub>6</sub>), 2.31 (s, 6H, H<sub>2</sub>'), 2.07 (s, 3H, H<sub>3</sub>'), 1.64 (s, 6H, H<sub>4</sub>'). <sup>13</sup>C NMR (100 MHz, DMSO)  $\delta$ : 176.1 (C=Se), 144.3 (C<sub>1</sub>), 132.7 (C<sub>3</sub>+C<sub>5</sub>), 122.6 (C<sub>2</sub>+C<sub>6</sub>), 120.0 (C<sub>4</sub>), 105.1 (CN), 54.9 (C<sub>1</sub>'), 40.5 (C<sub>2</sub>'), 35.8 (C<sub>4</sub>'), 29.0 (C<sub>3</sub>'). <sup>77</sup>Se NMR (76 MHz, DMSO)  $\delta$ : 312.7 (C=Se). HRMS calcd. For C<sub>18</sub>H<sub>21</sub>N<sub>3</sub>Se [M+Na]: 382.0793, found 382.0788 [M+Na].

3. NMR SPECTRA ( $^1\text{H}$ ,  $^{13}\text{C}$  AND  $^{77}\text{Se}$ ) OF FINAL PRODUCTS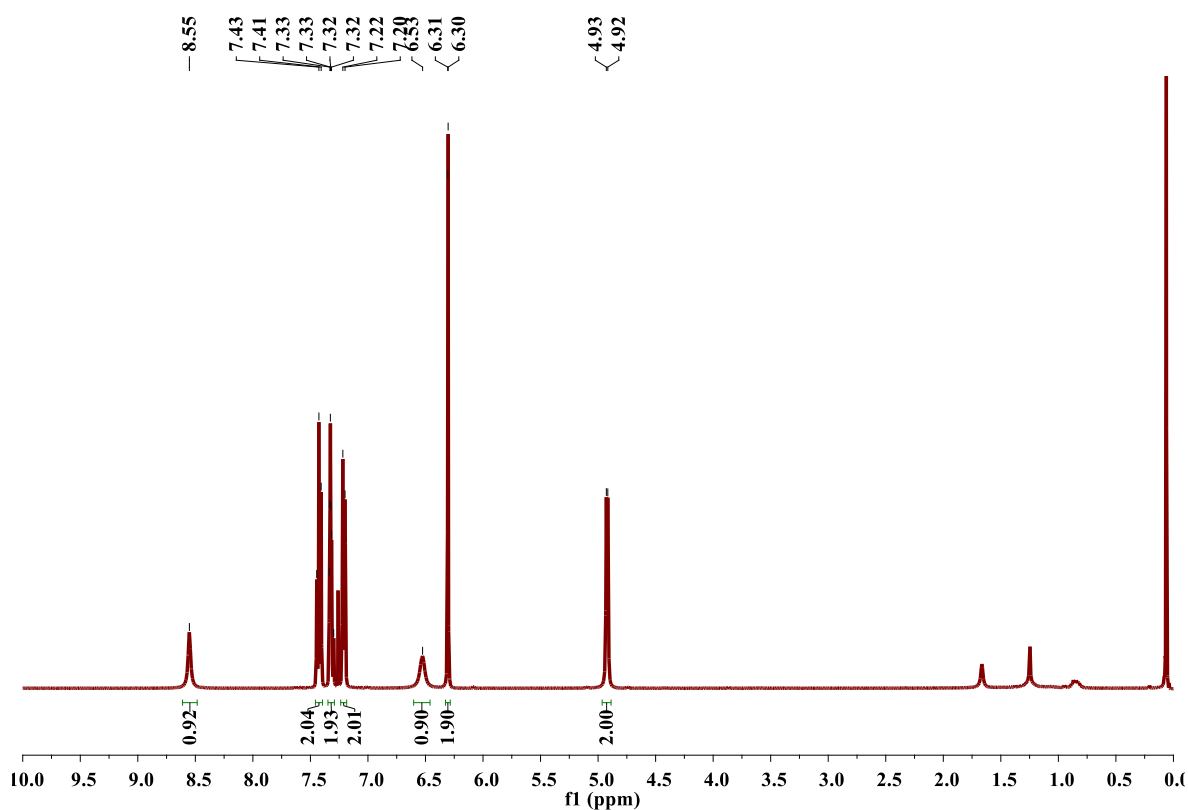Figure S6.  $^1\text{H}$ -NMR of compound 1a.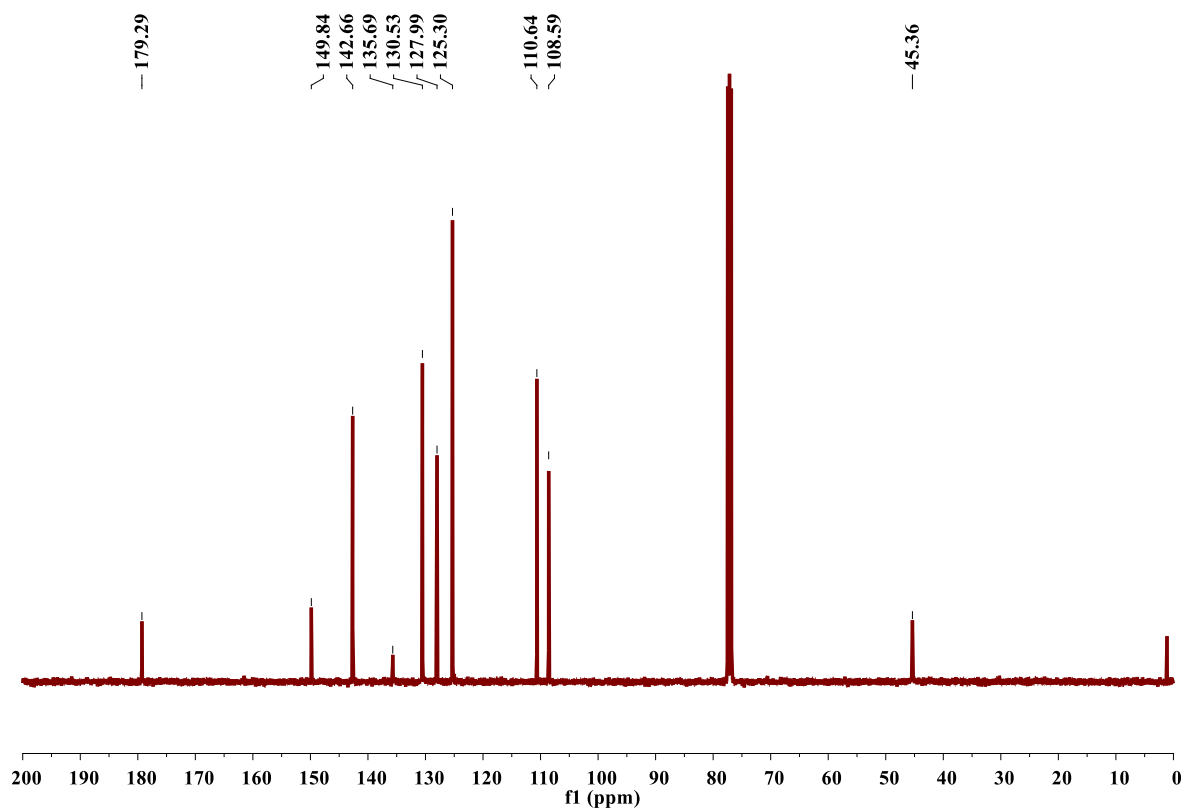Figure S7.  $^{13}\text{C}$ -NMR of compound 1a.

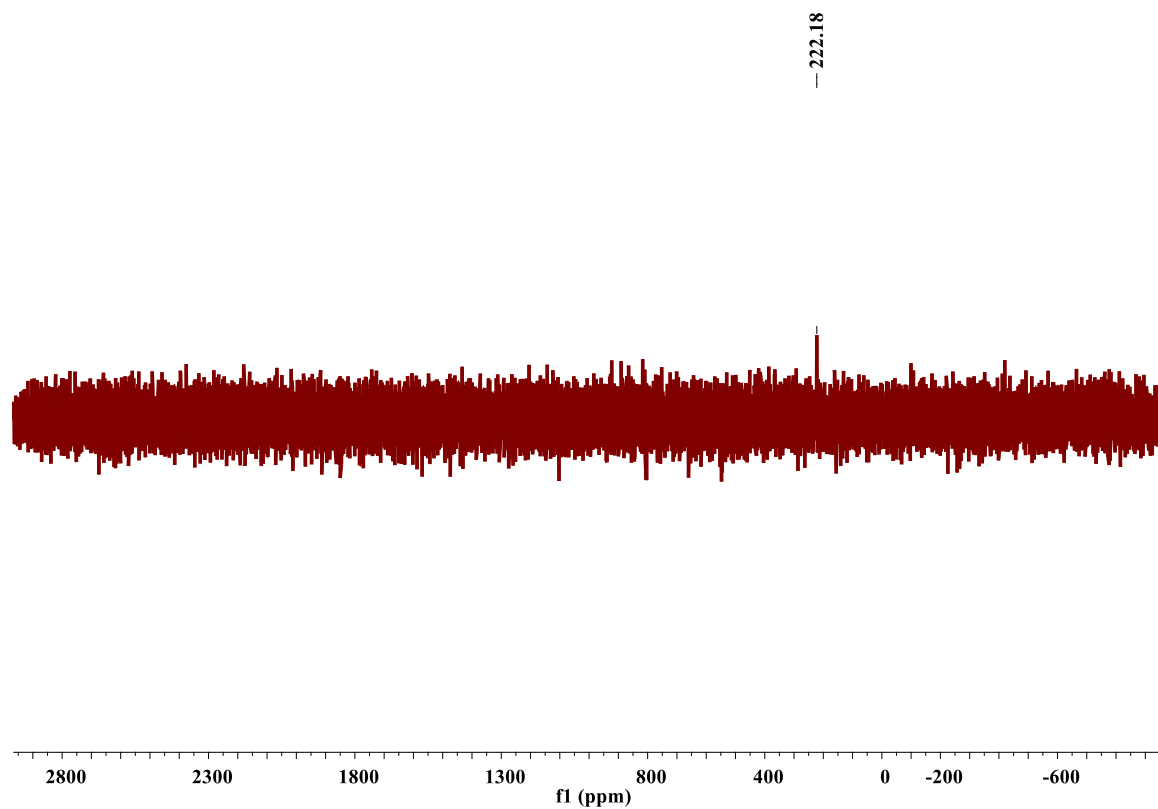

Figure S8.  $^{77}\text{Se}$ -NMR of compound **1a**.

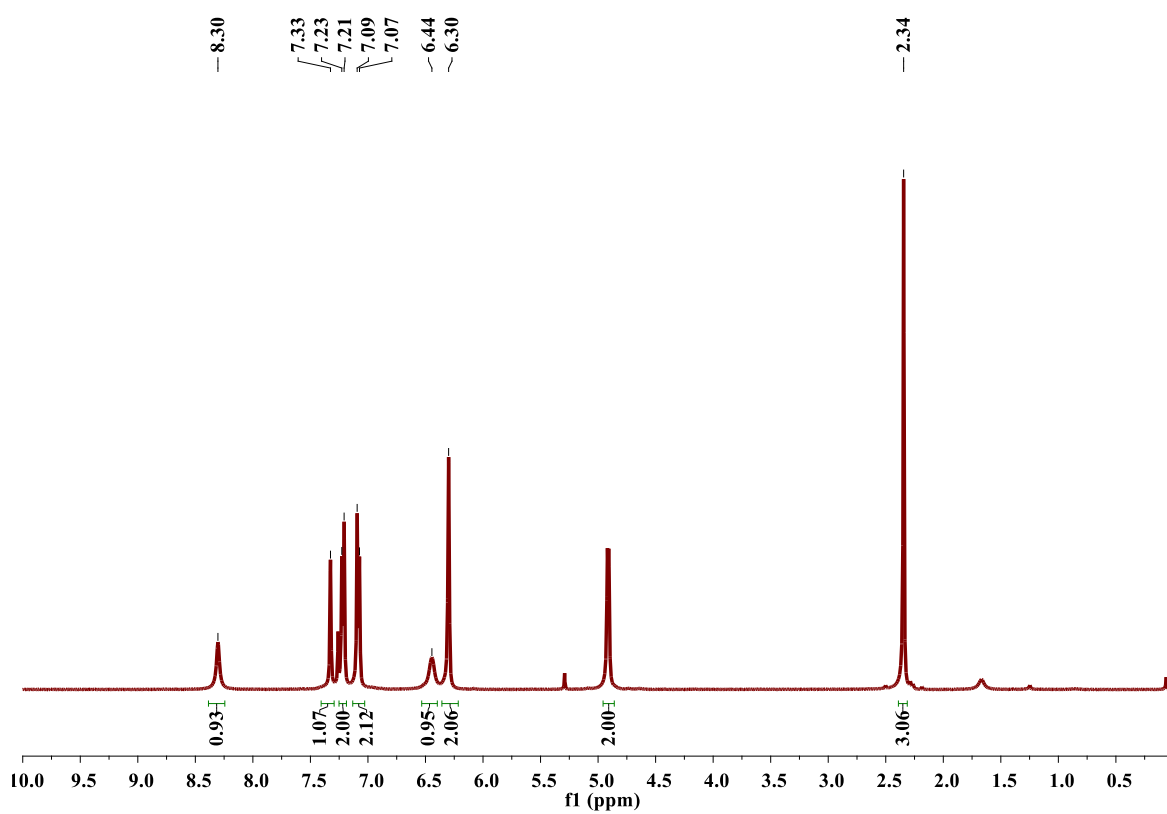

Figure S9.  $^1\text{H}$ -NMR of compound **1b**.

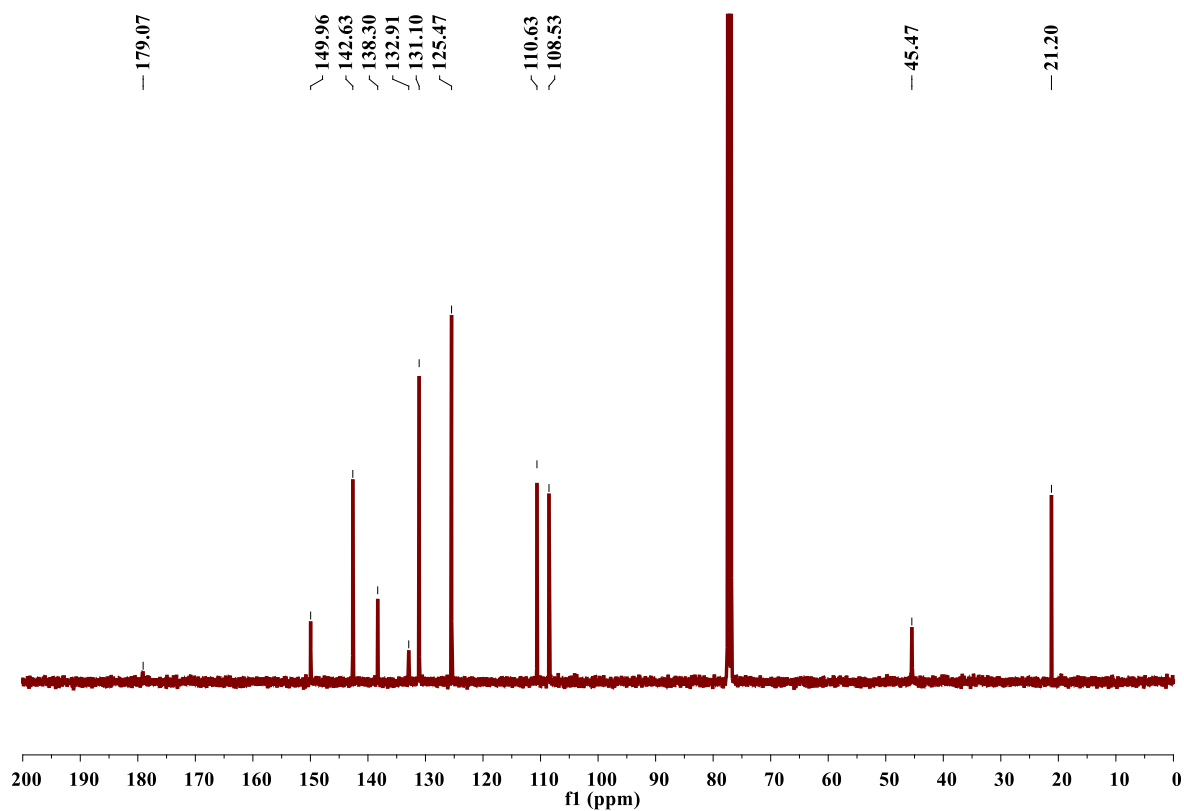Figure S10. <sup>13</sup>C-NMR of compound 1b.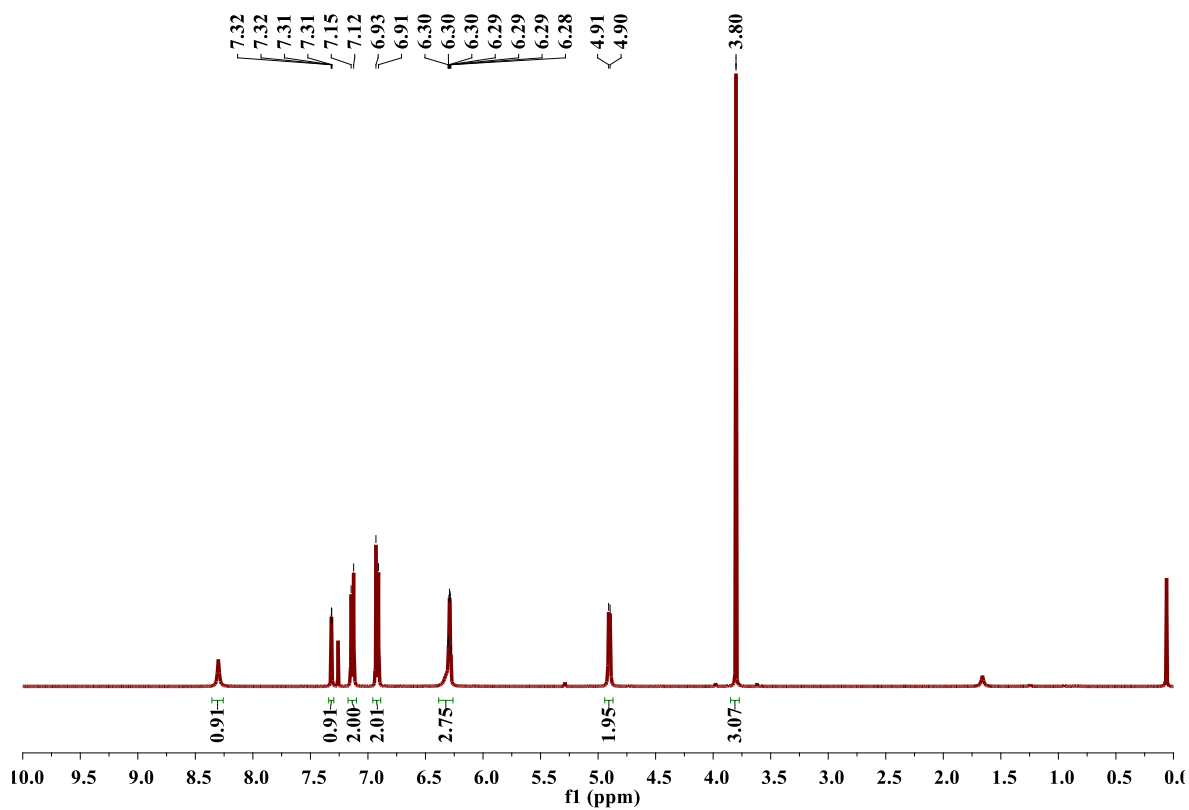Figure S11. <sup>1</sup>H-NMR of compound 1c.

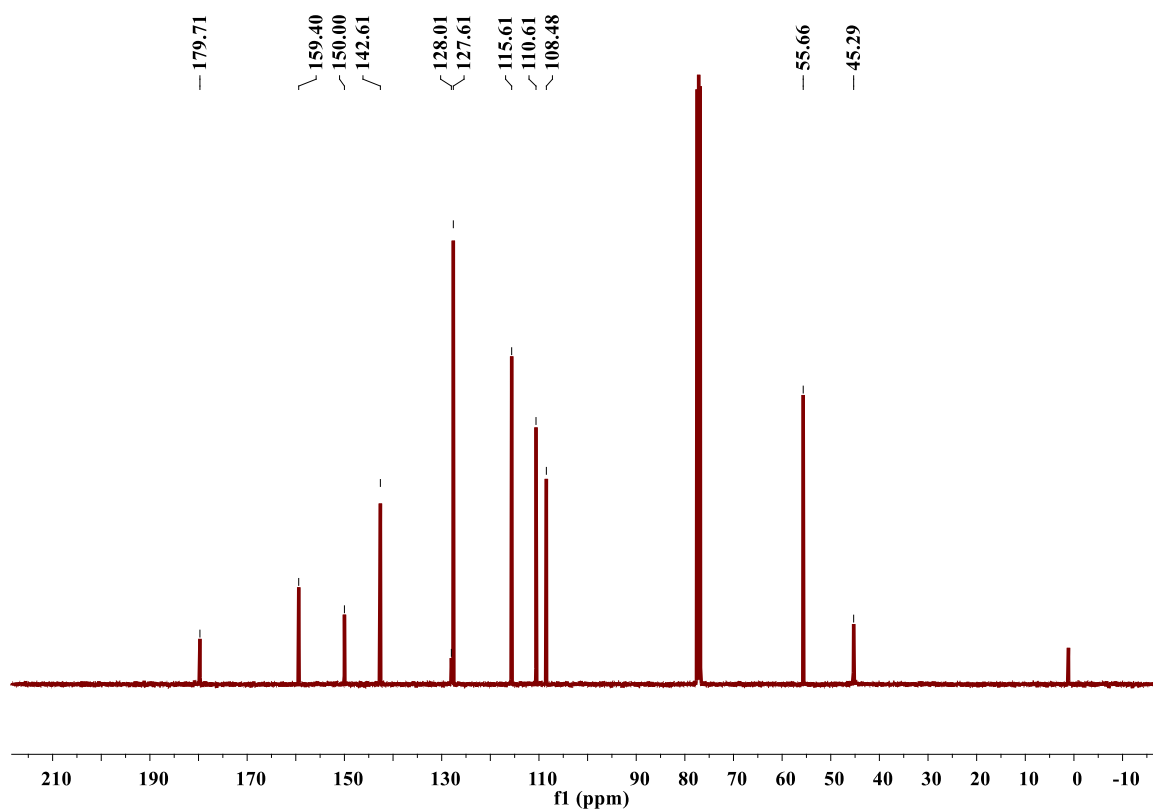

Figure S12.  $^{13}\text{C}$ -NMR of compound **1c**.

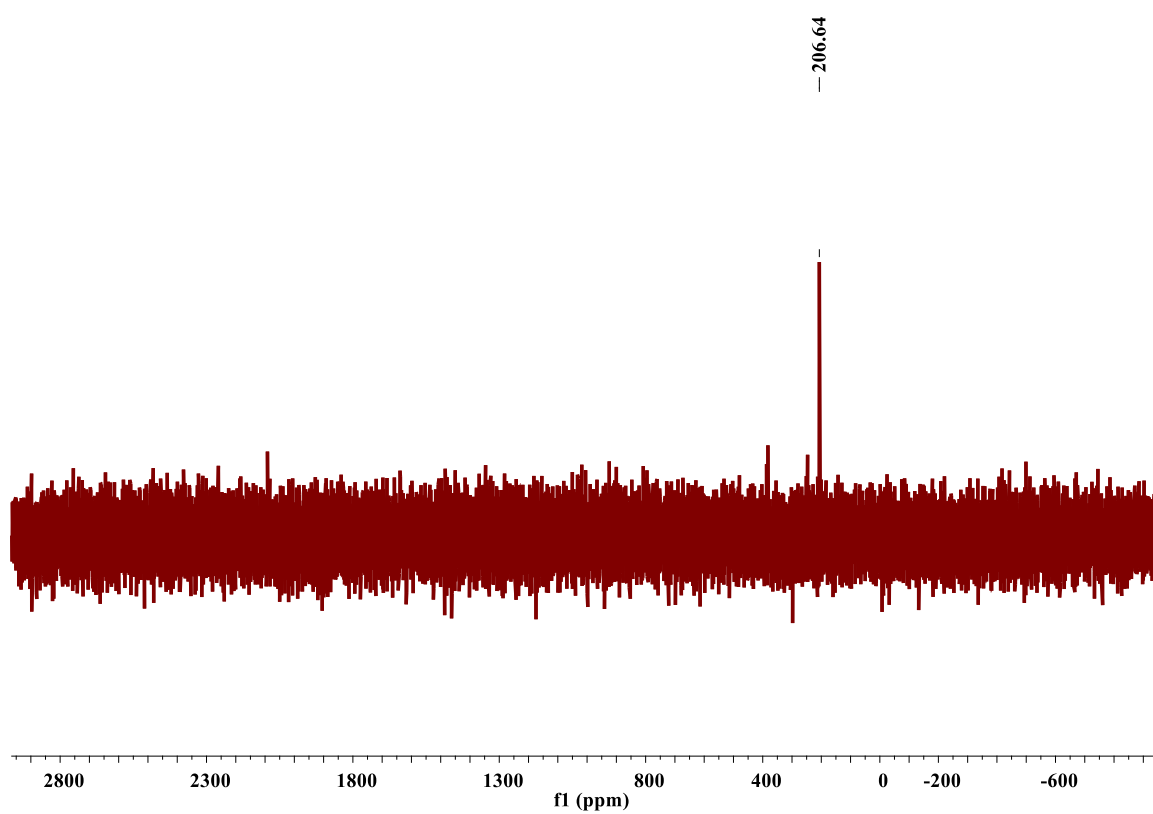

Figure S13.  $^{77}\text{Se}$ -NMR of compound **1c**.

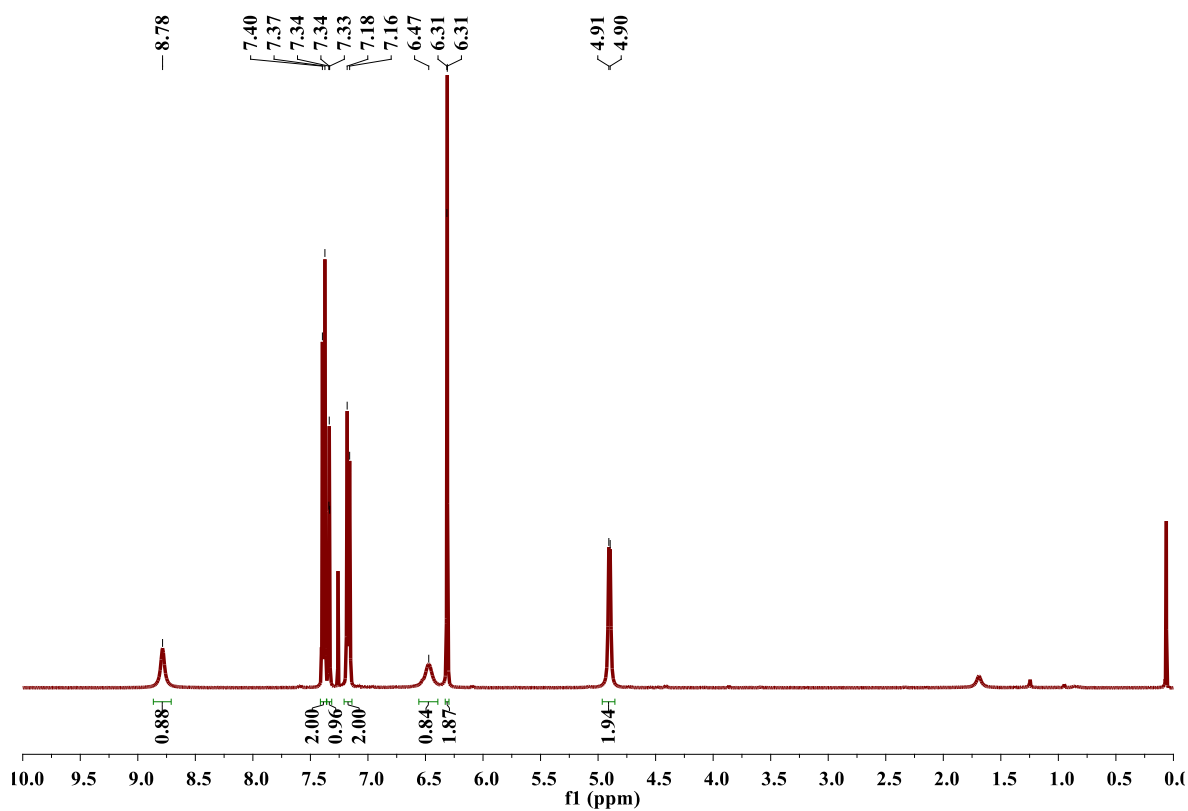Figure S14. <sup>1</sup>H-NMR of compound 1d.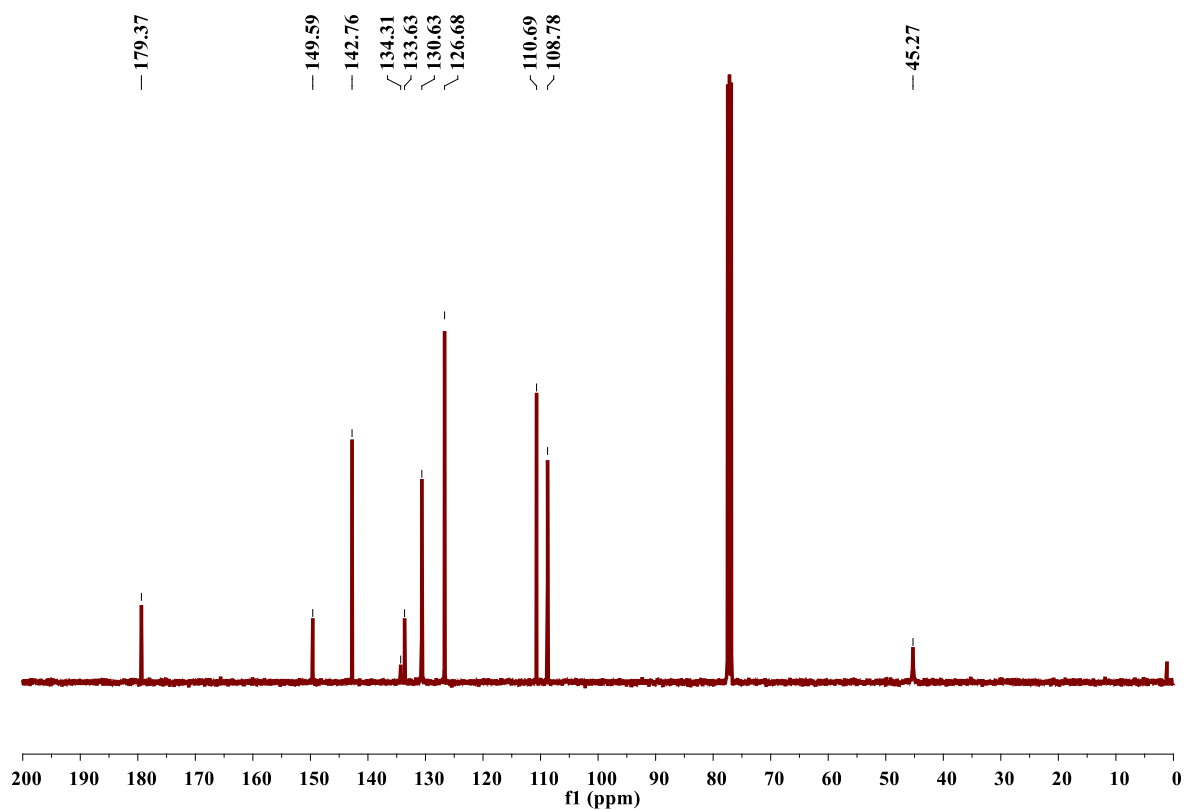Figure S15. <sup>13</sup>C-NMR of compound 1d.



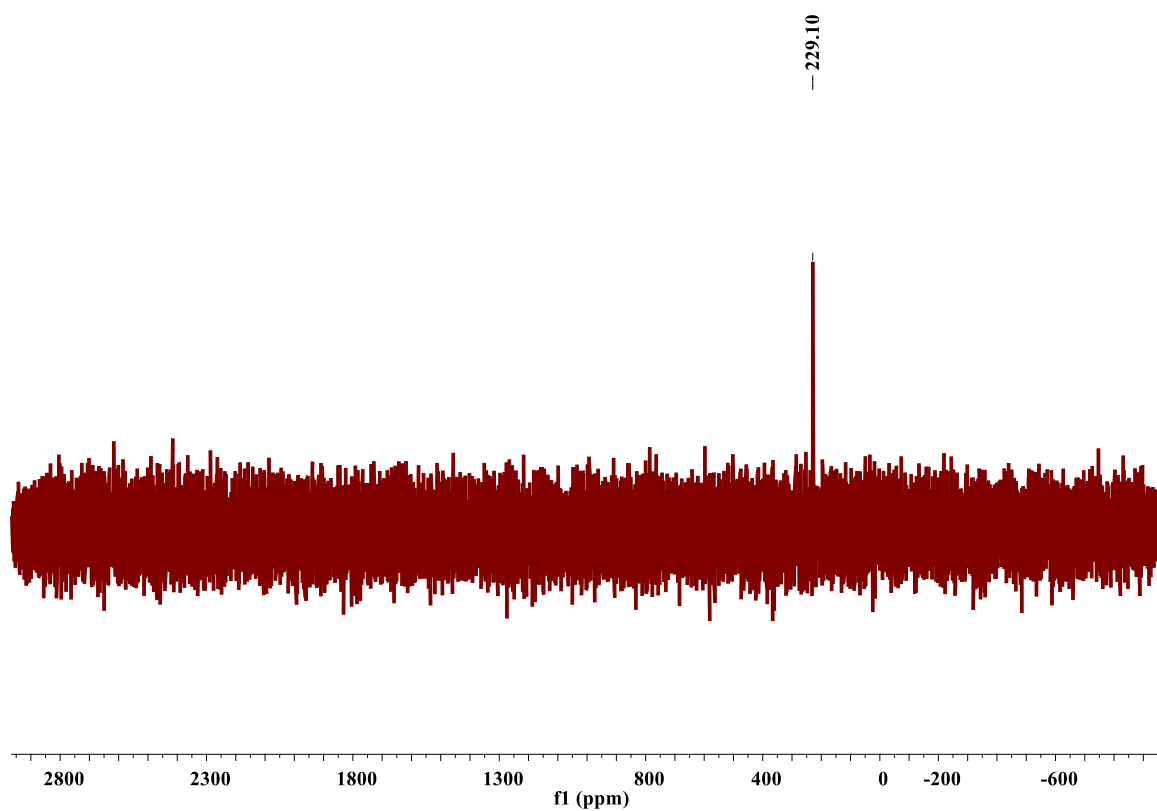

Figure S16.  $^{77}\text{Se}$ -NMR of compound **1d**.

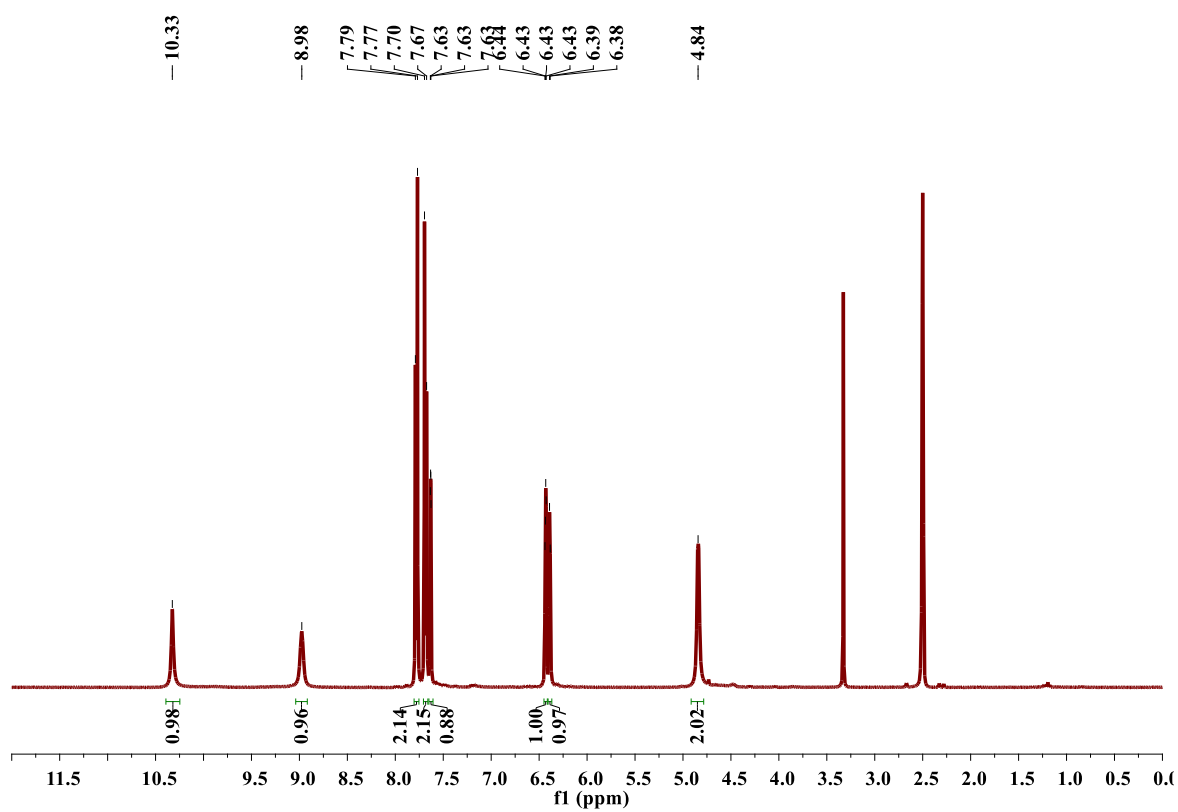

Figure S17.  $^1\text{H}$ -NMR of compound **1e**.

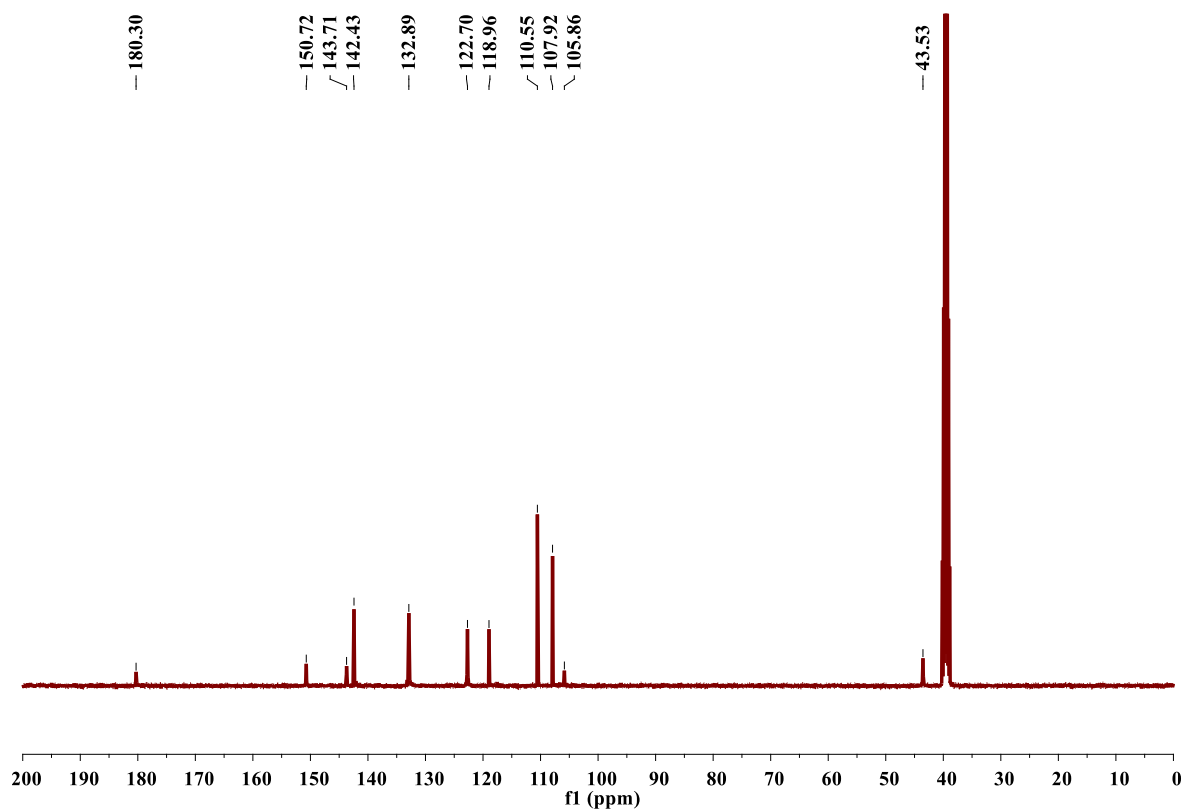

Figure S18. <sup>13</sup>C-NMR of compound **1e**.

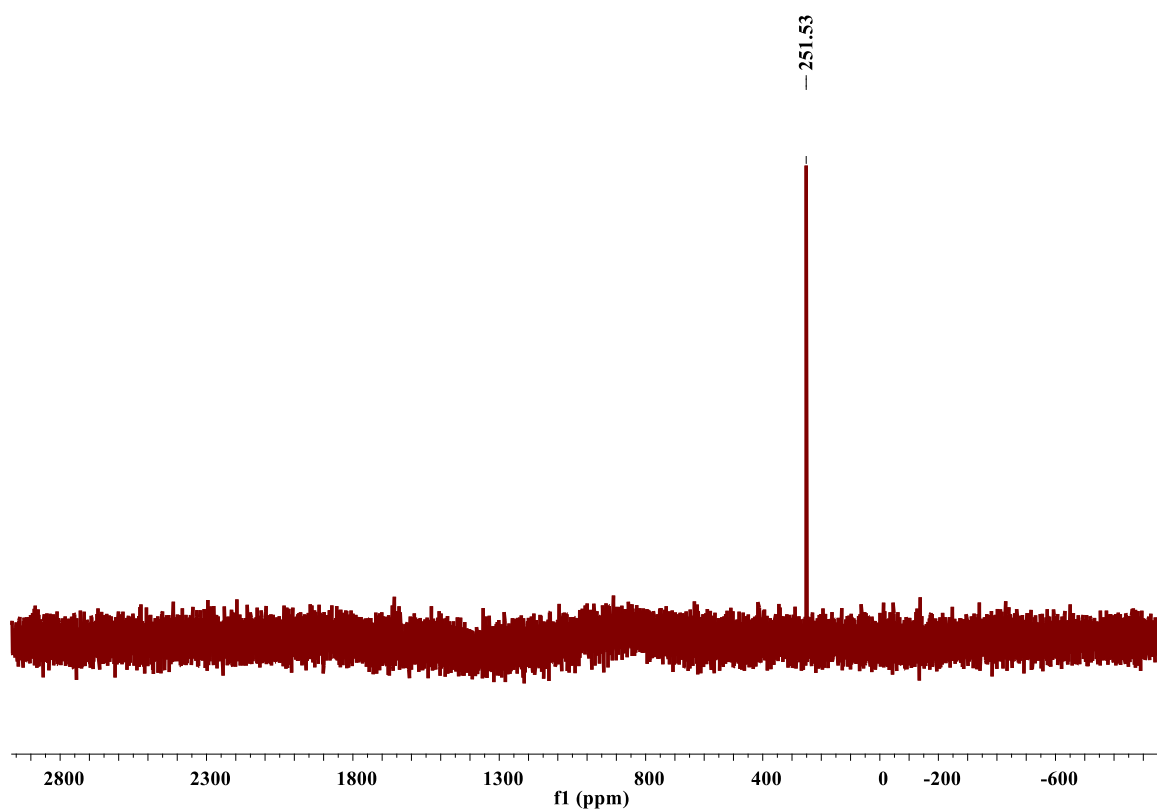

Figure S19. <sup>77</sup>Se-NMR of compound **1e**.

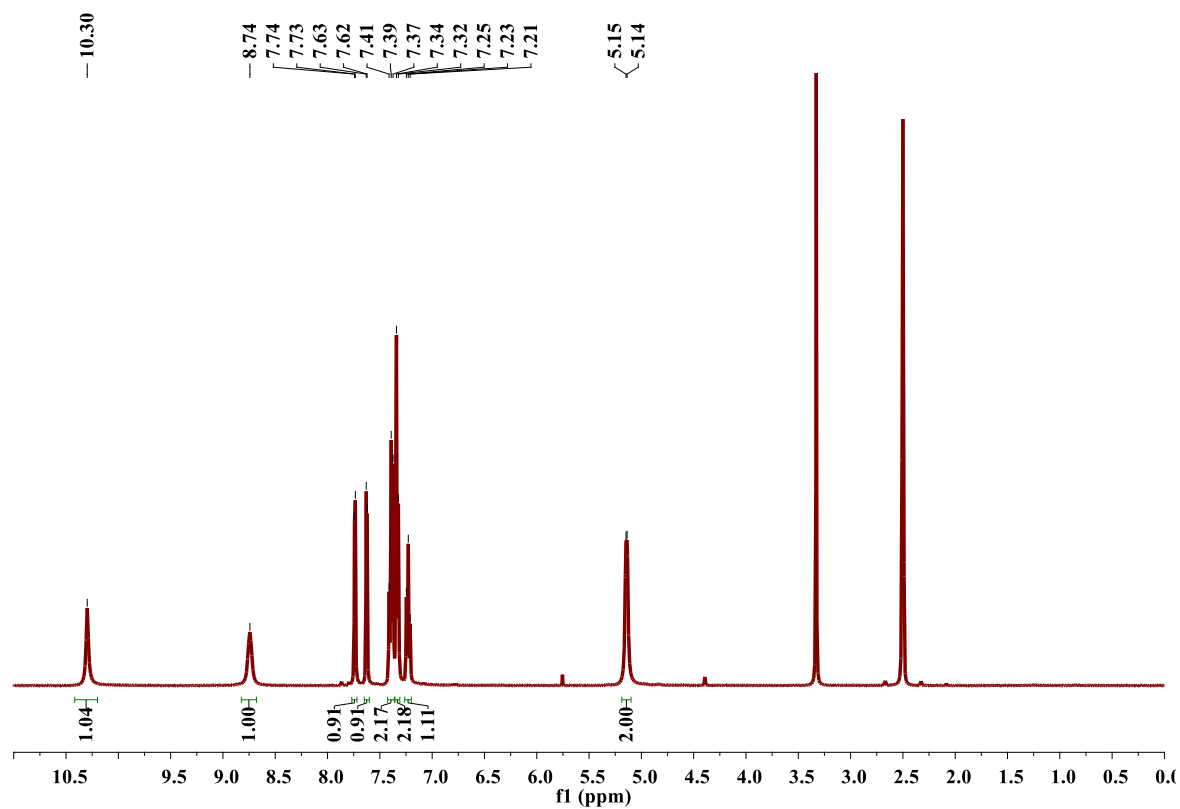Figure S20. <sup>1</sup>H-NMR of compound 2a.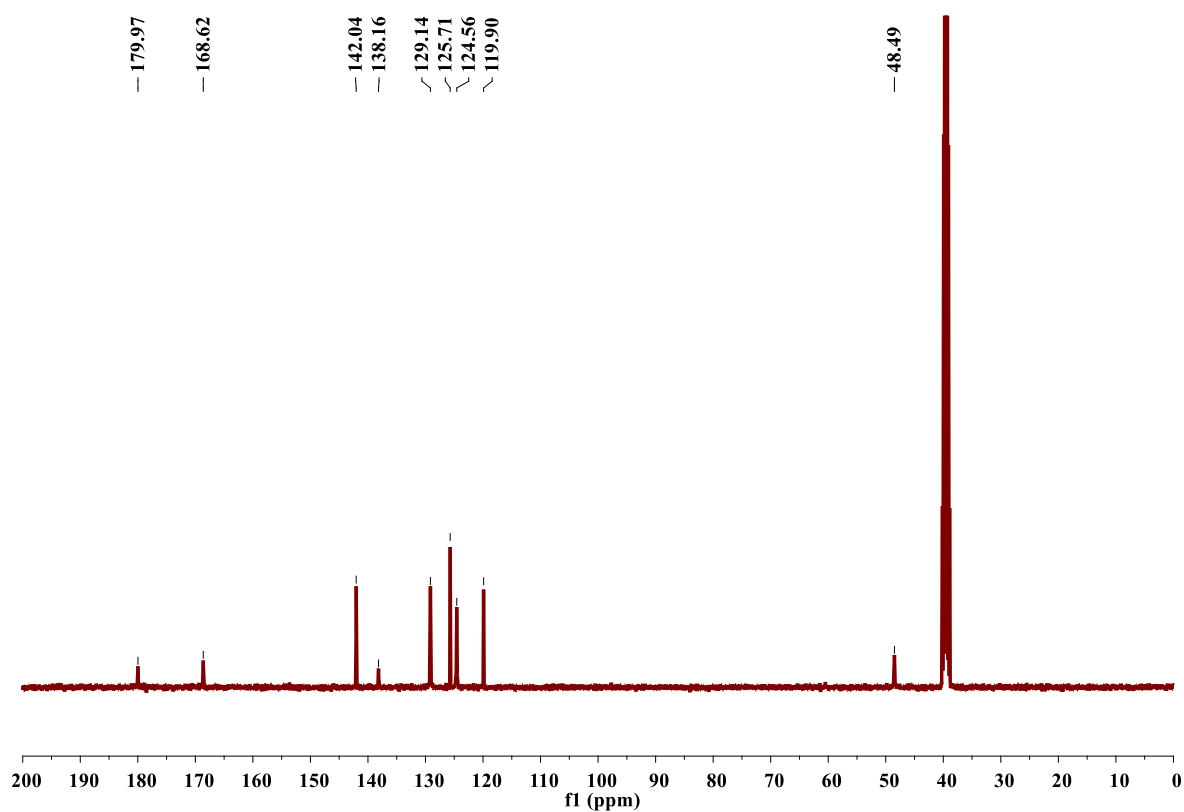Figure S21. <sup>13</sup>C-NMR of compound 2a.

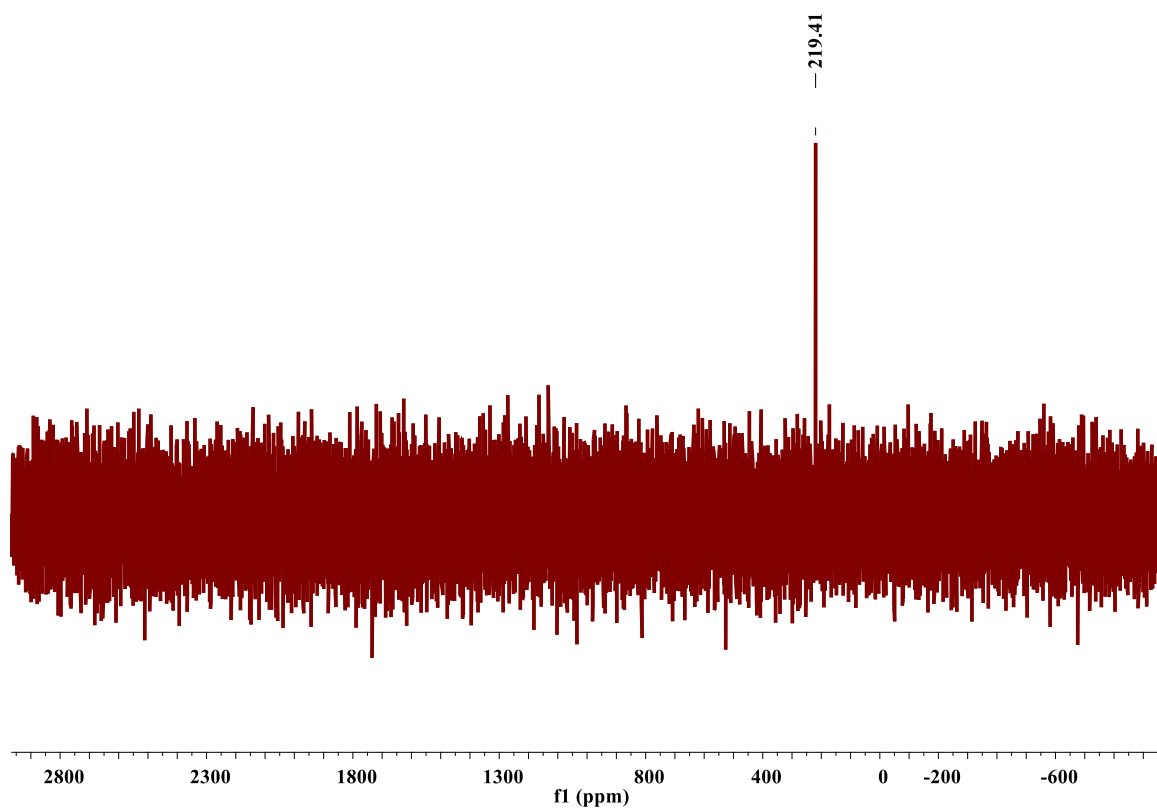Figure S22.  $^{77}\text{Se}$ -NMR of compound 2a.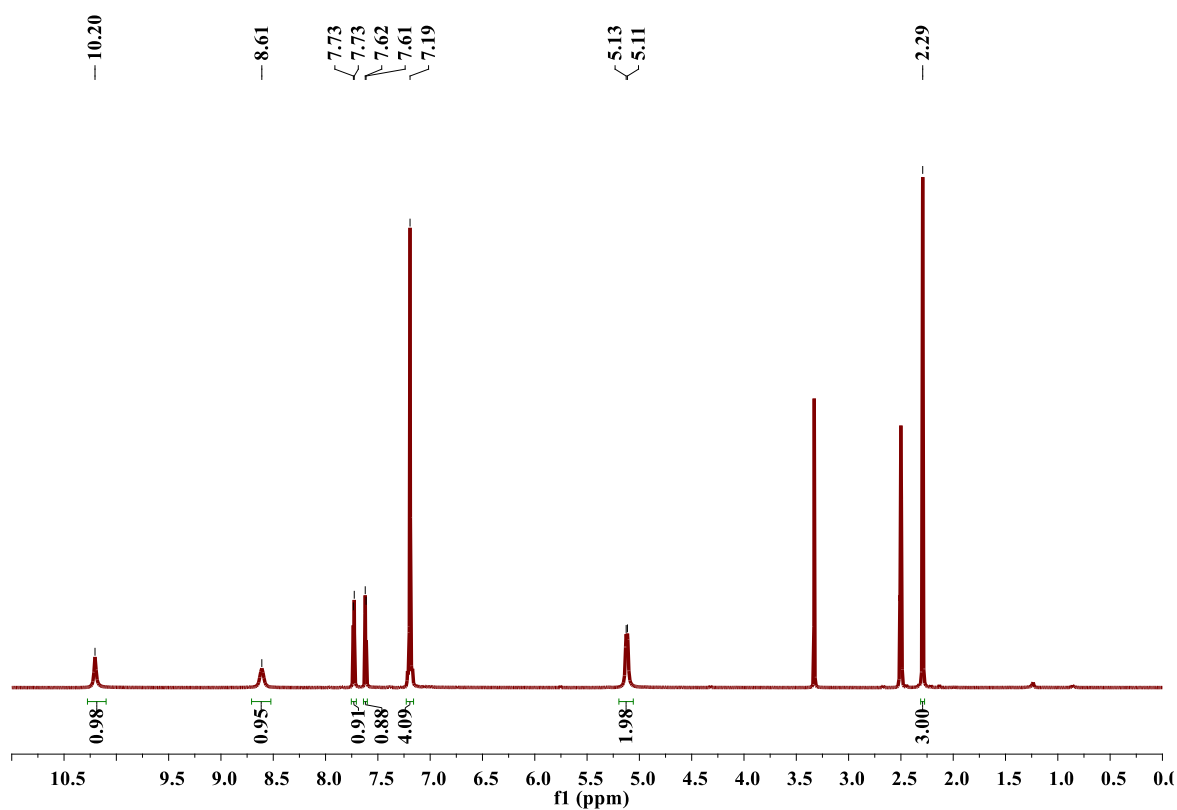Figure S23.  $^1\text{H}$ -NMR of compound 2b.

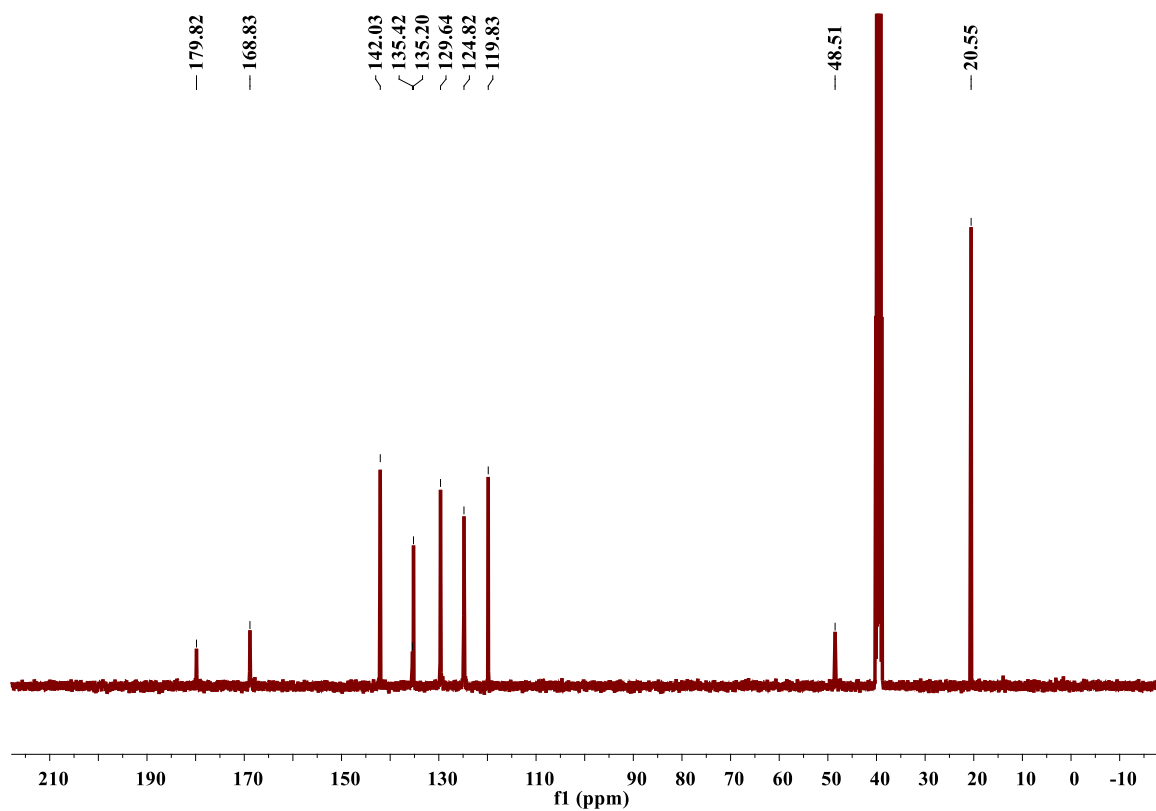

Figure S24. <sup>13</sup>C-NMR of compound 2b.

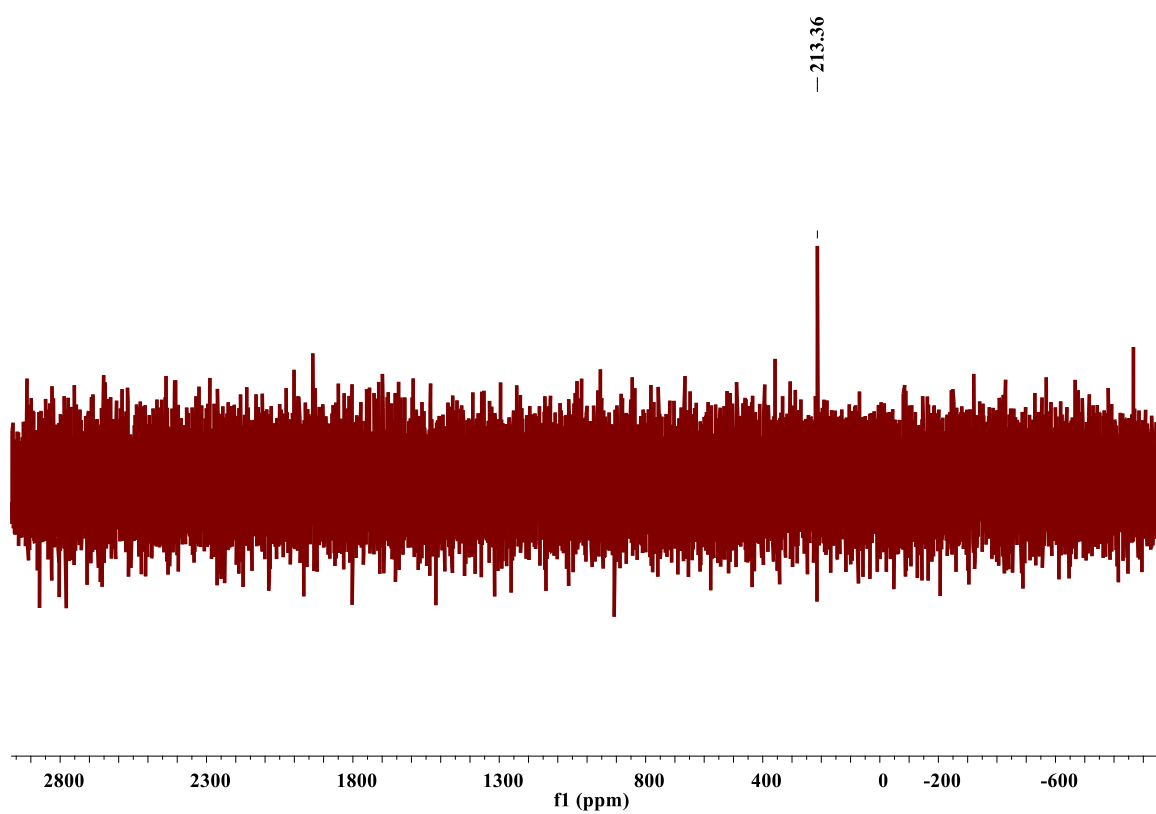

Figure S25. <sup>77</sup>Se-NMR of compound 2b.

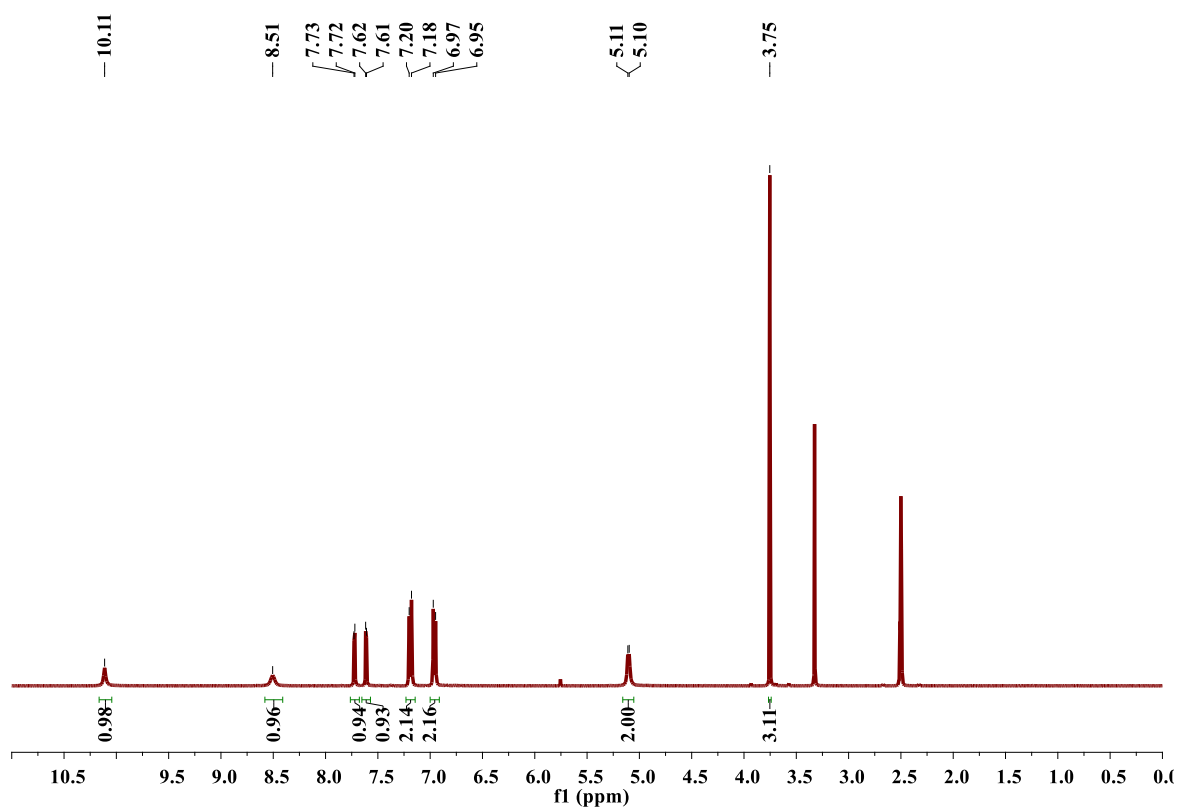Figure S26. <sup>1</sup>H-NMR of compound 2c.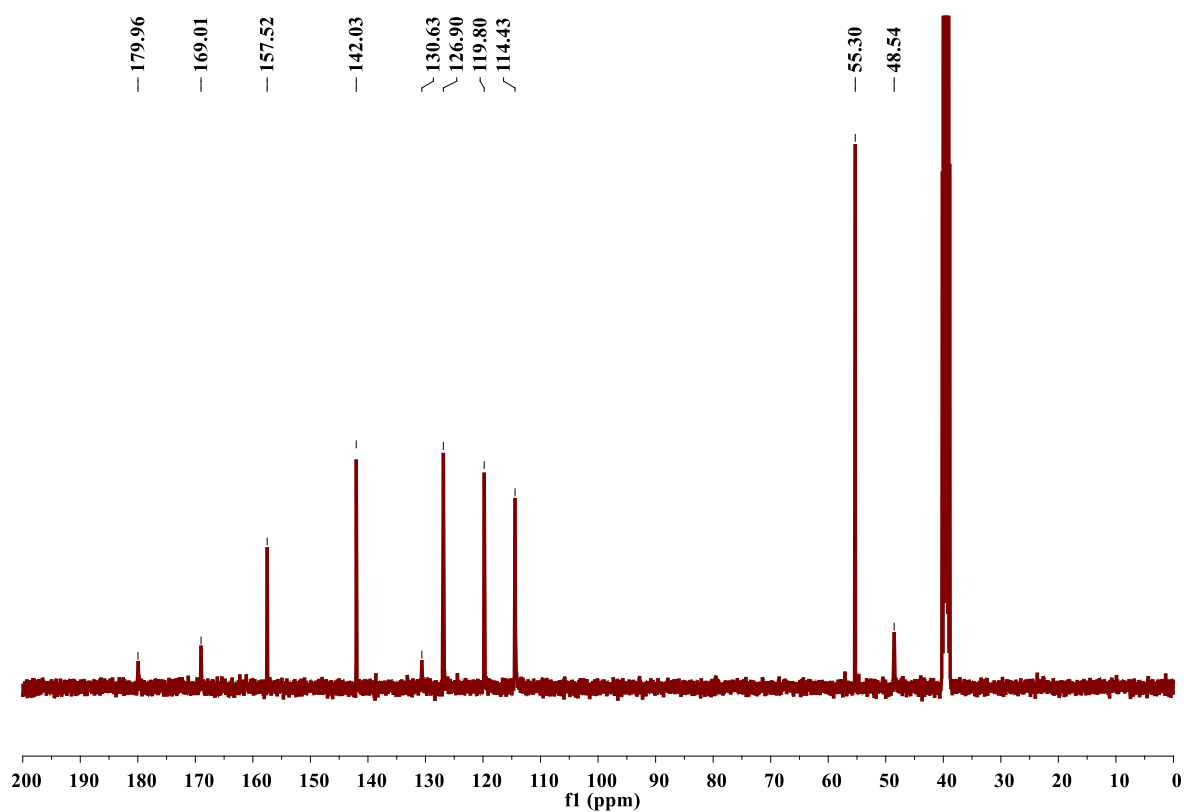Figure S27. <sup>13</sup>C-NMR of compound 2c.

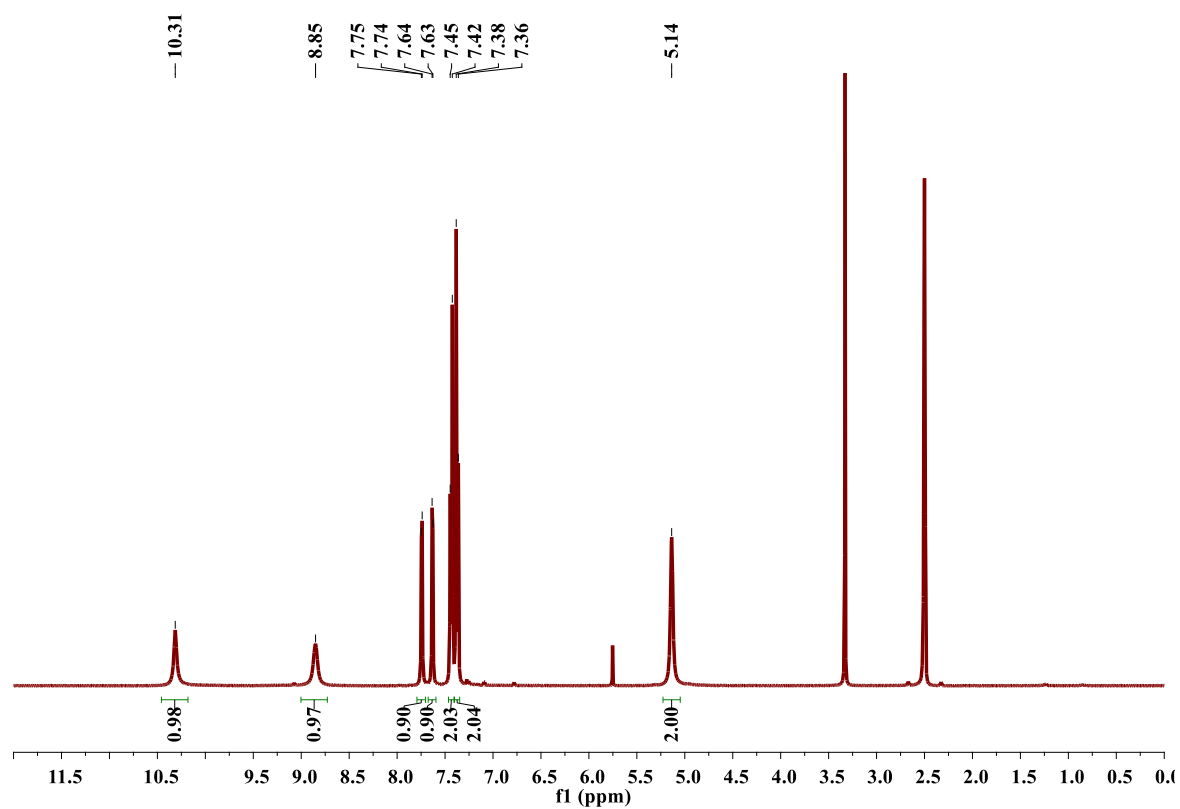Figure S28. <sup>1</sup>H-NMR of compound 2d.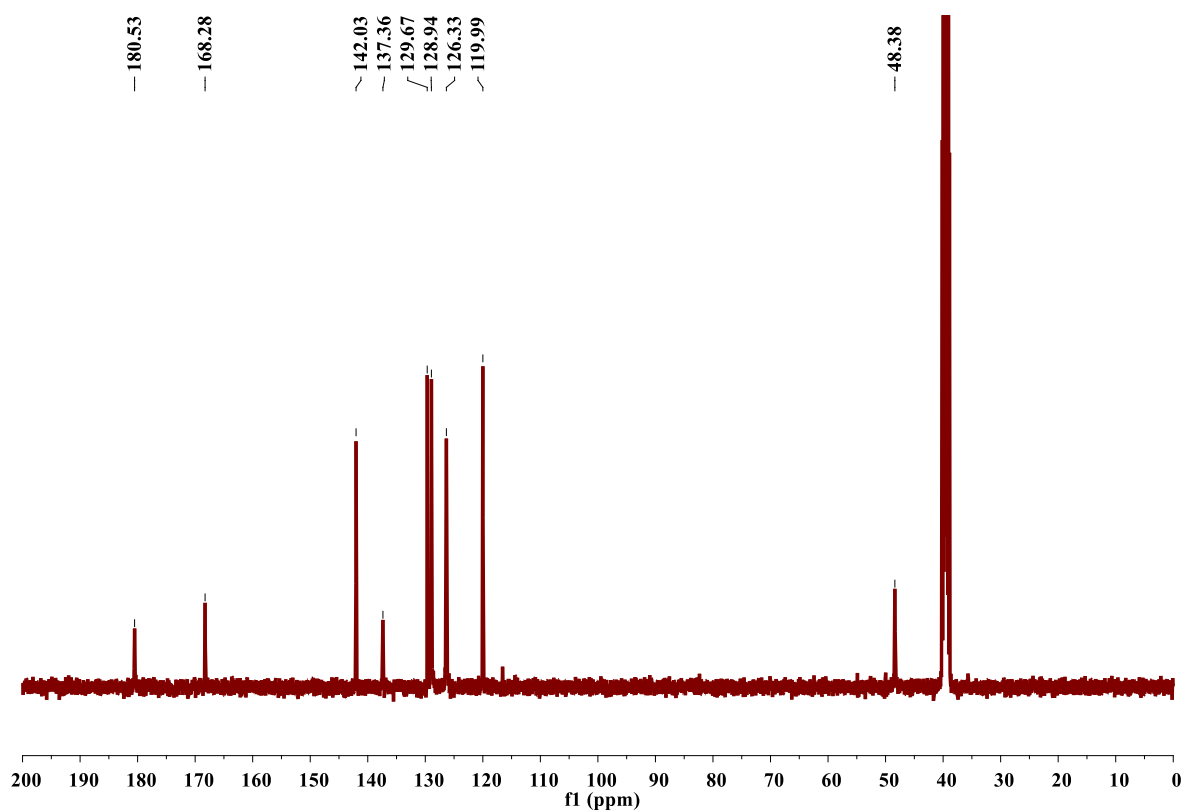Figure S29. <sup>13</sup>C-NMR of compound 2d.

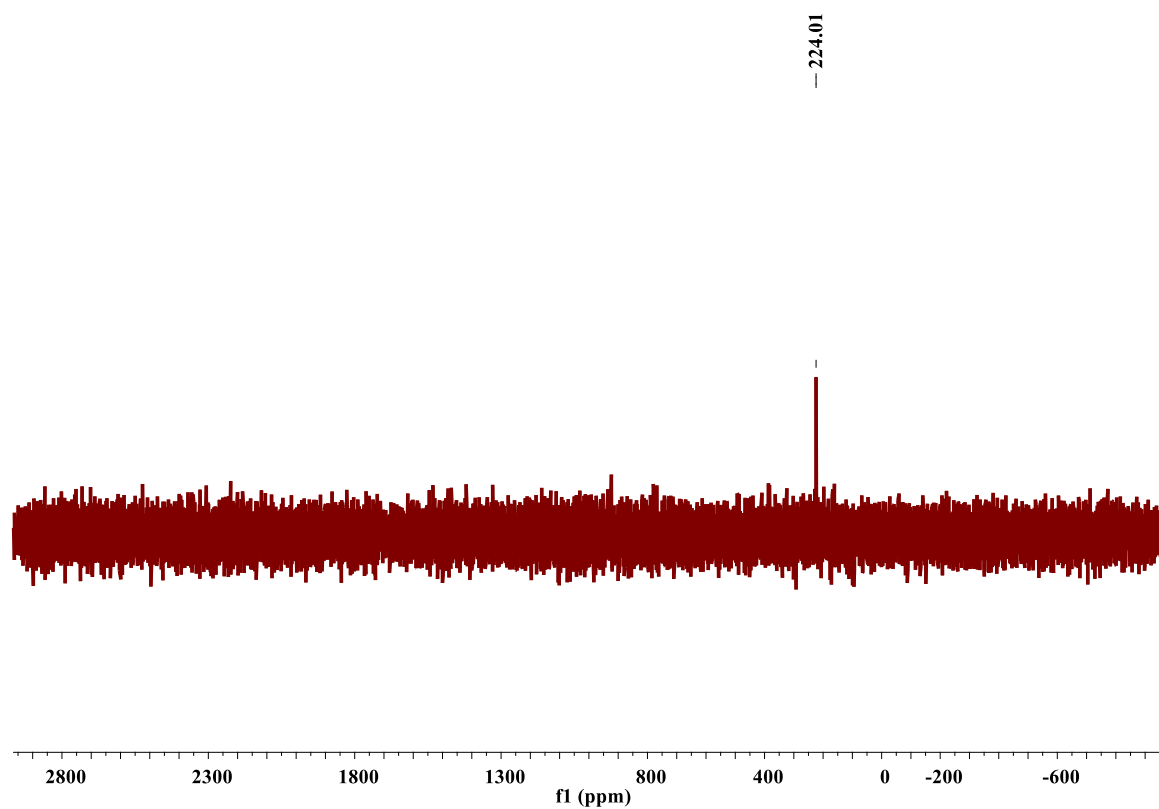

Figure S30.  $^{77}\text{Se}$ -NMR of compound 2d.

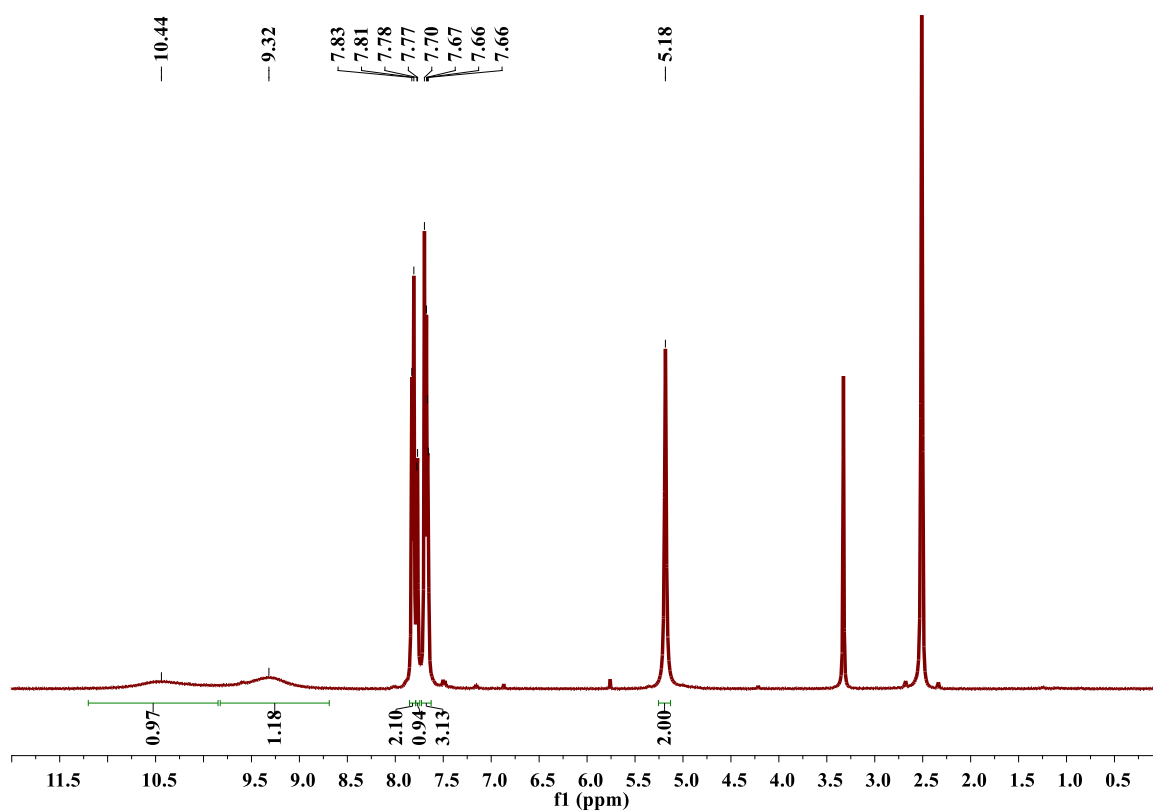

Figure S31.  $^1\text{H}$ -NMR of compound 2e.



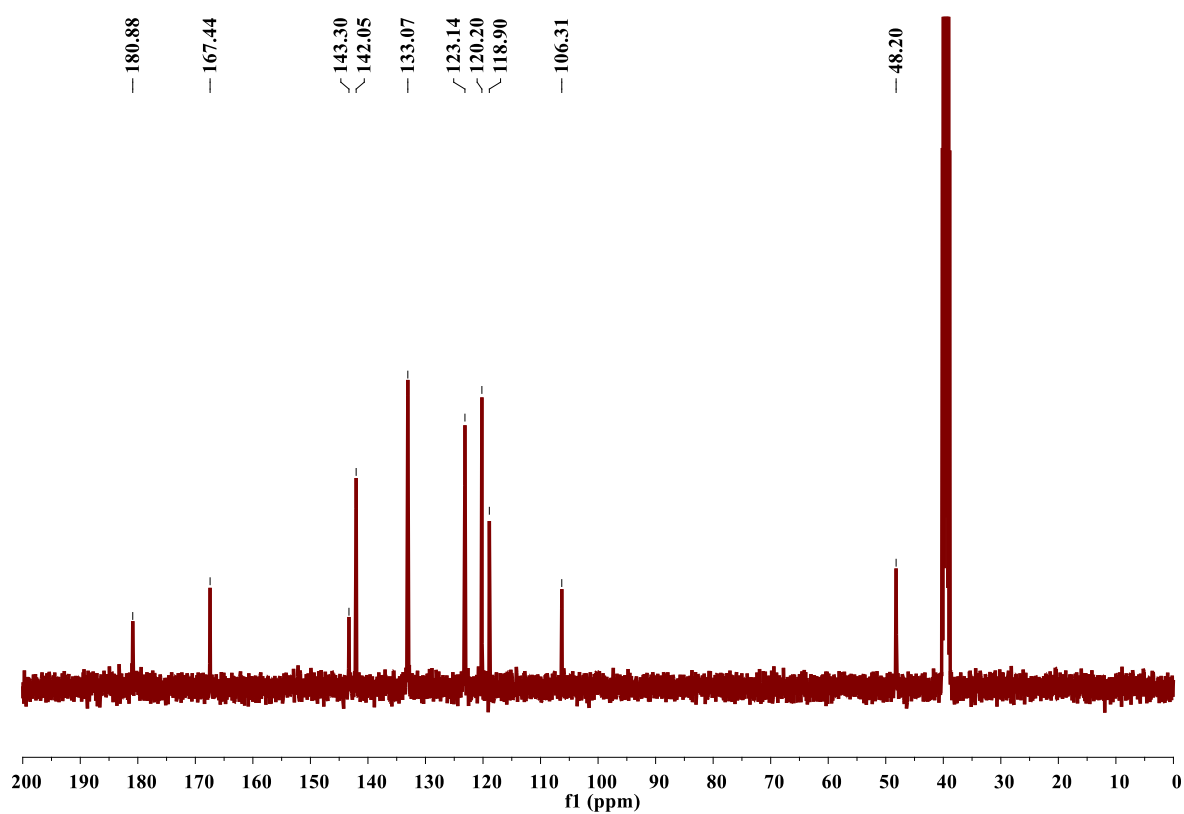

Figure S32.  $^{13}\text{C}$ -NMR of compound 2e.

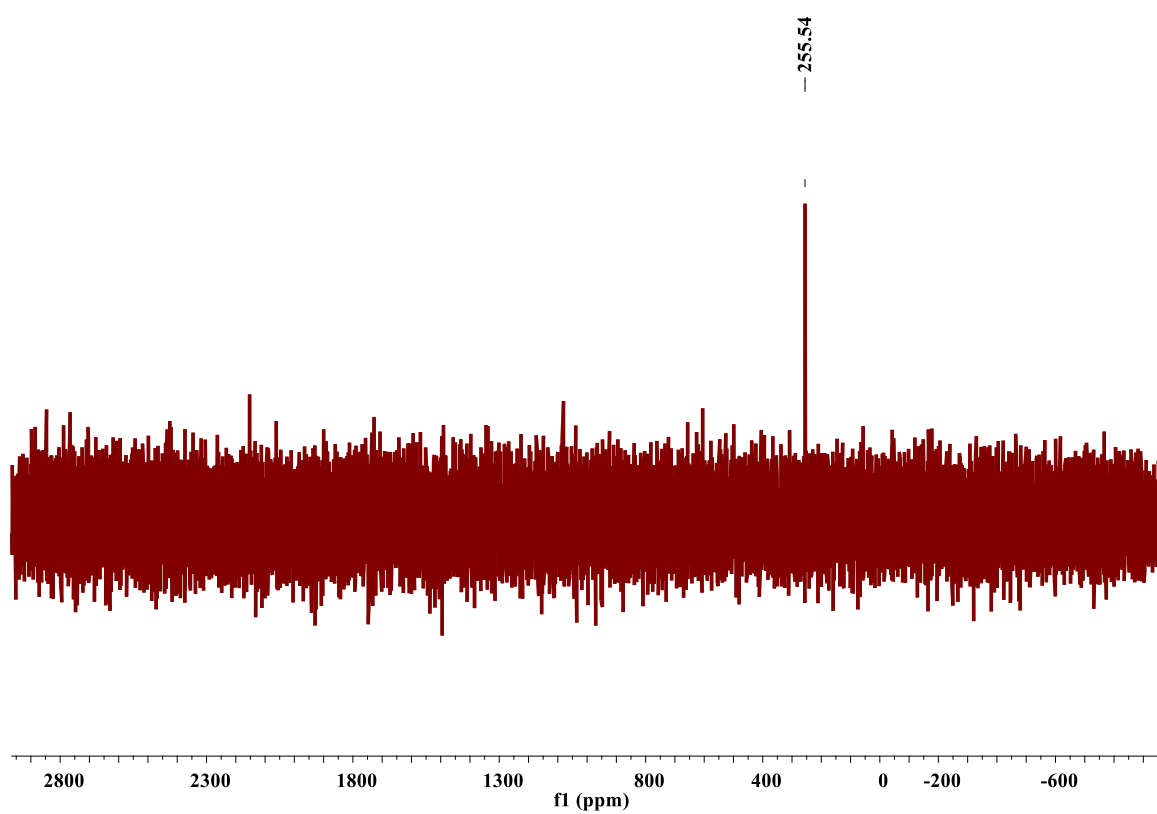

Figure S33.  $^{77}\text{Se}$ -NMR of compound 2e.

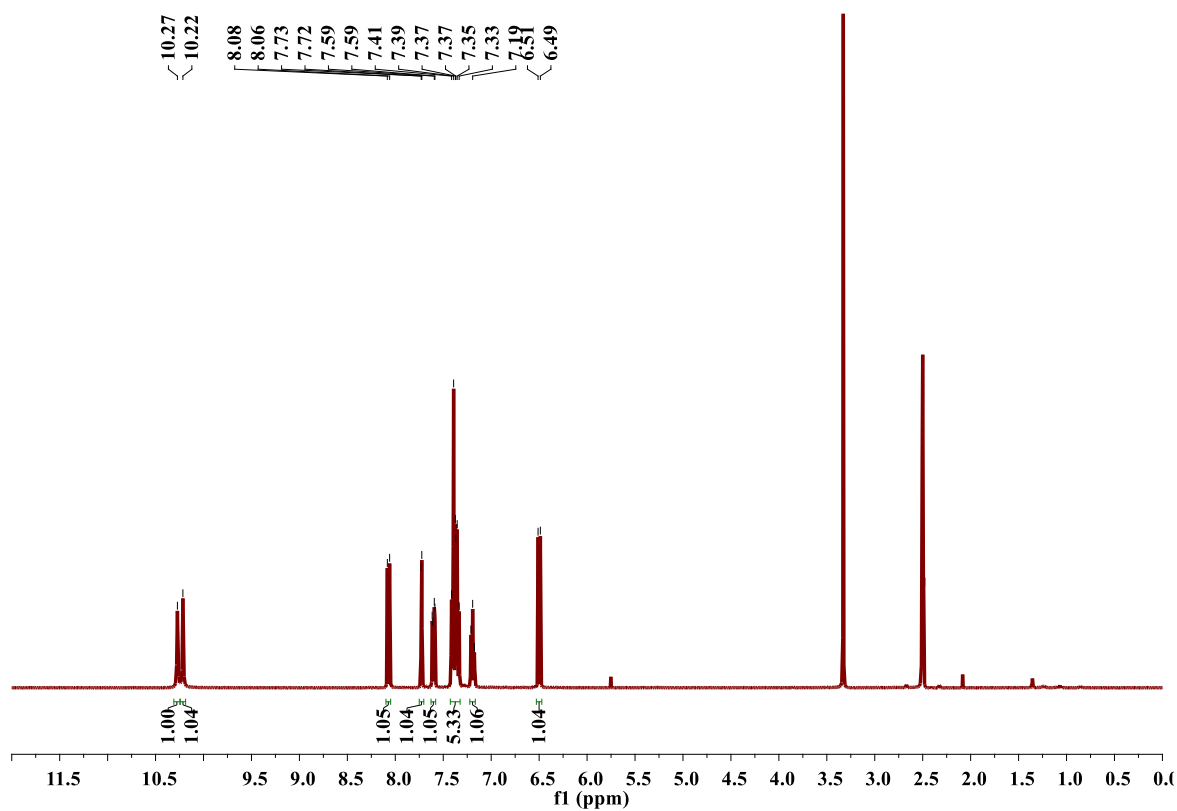Figure S34. <sup>1</sup>H-NMR of compound 3a.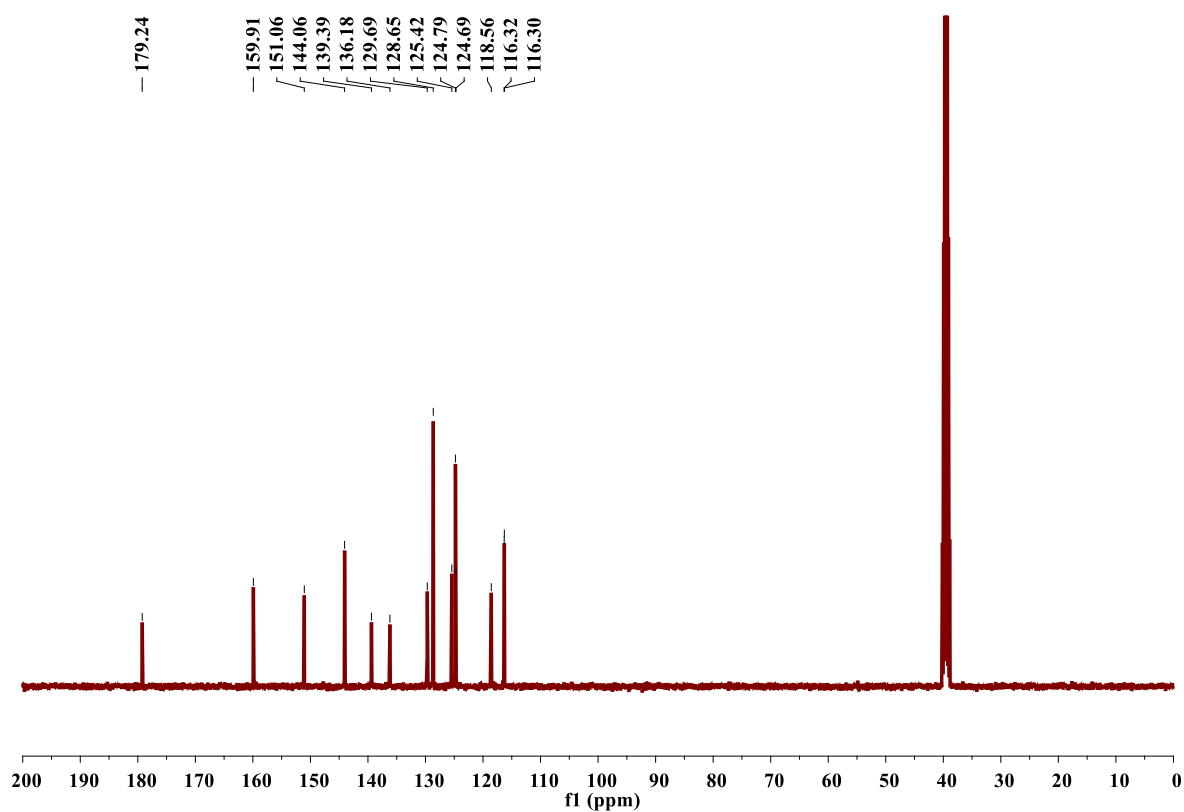Figure S35. <sup>13</sup>C-NMR of compound 3a.

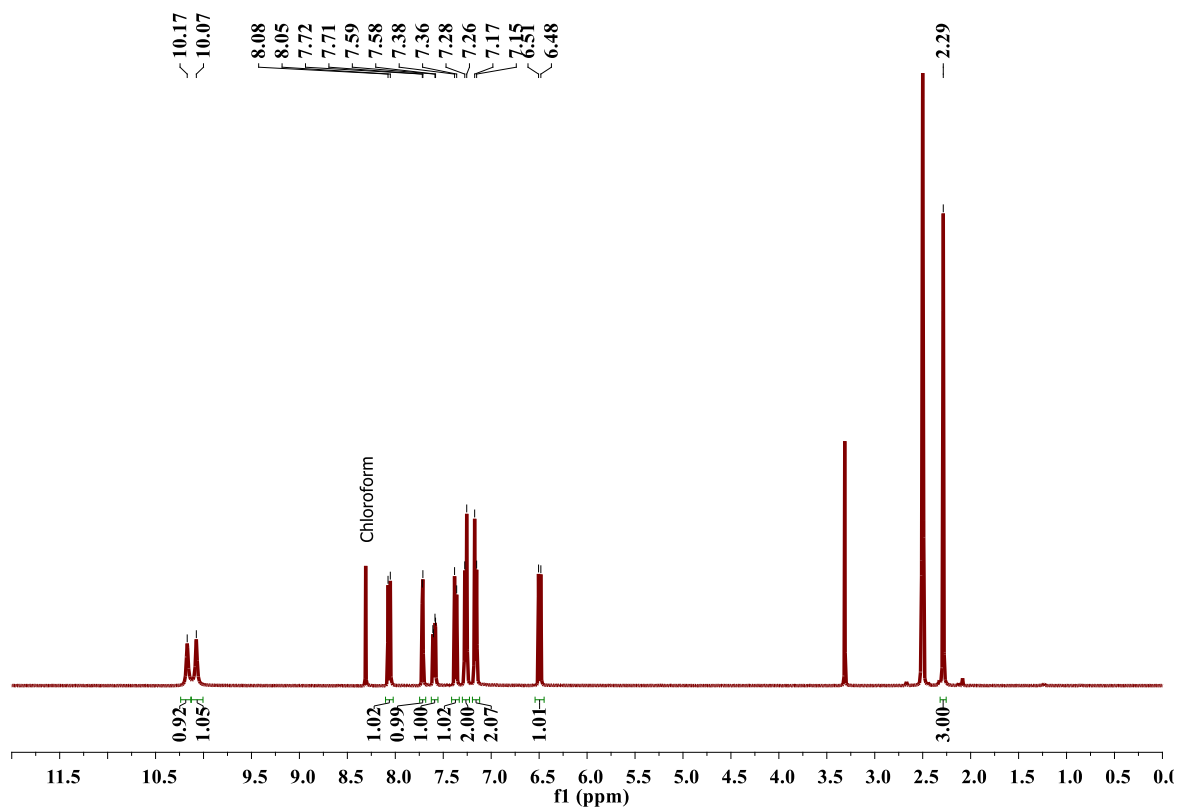Figure S36. <sup>1</sup>H-NMR of compound **3b**.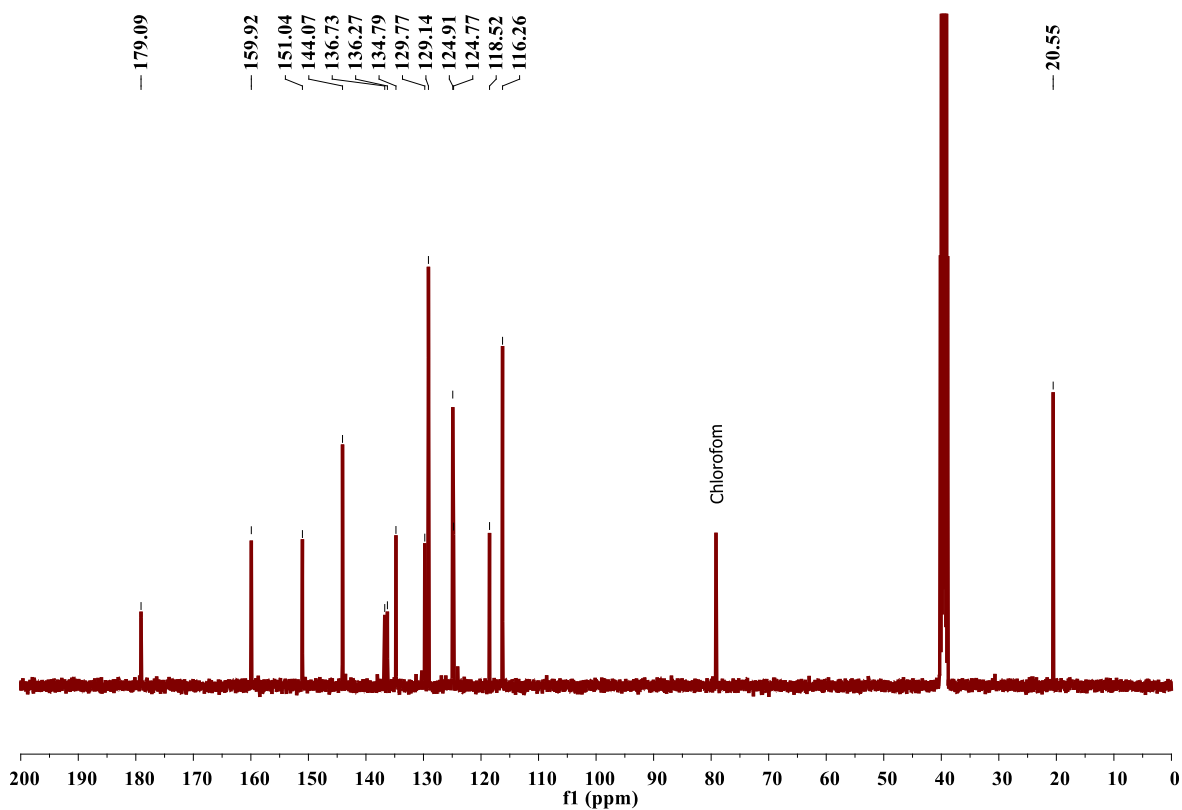Figure S37. <sup>13</sup>C-NMR of compound **3b**.

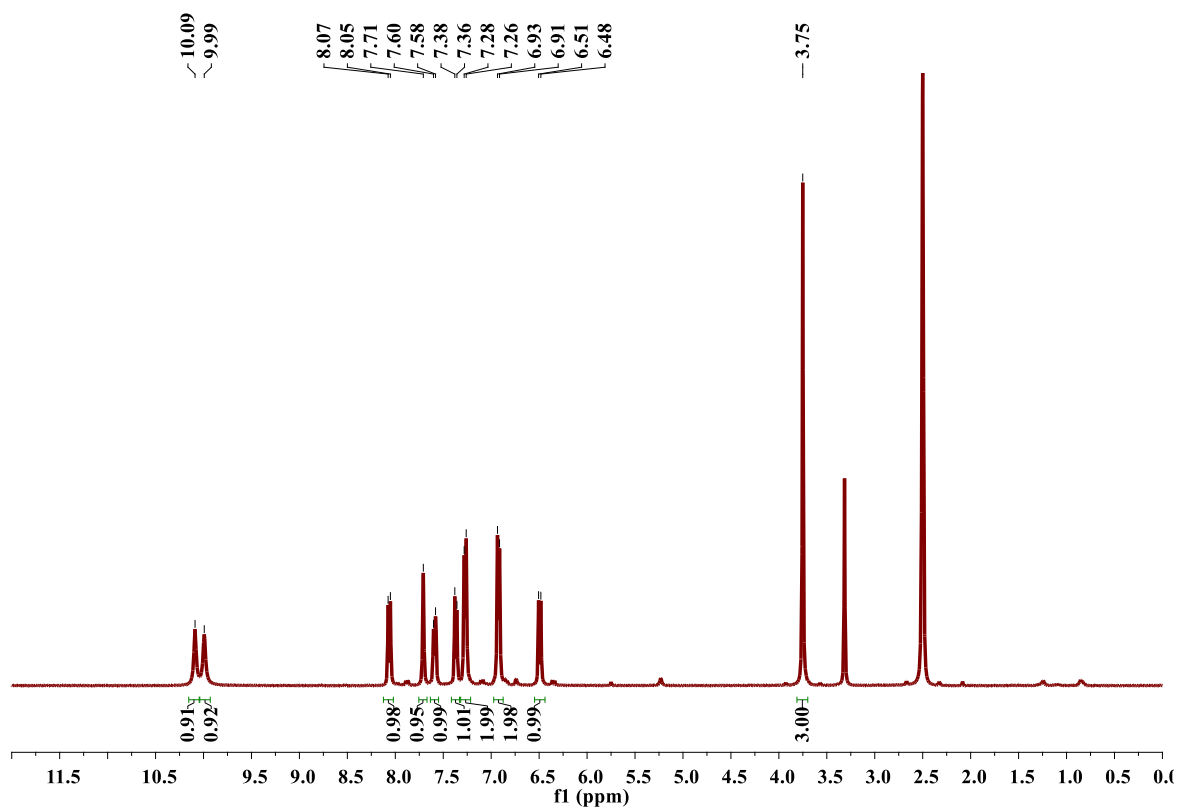Figure S38. <sup>1</sup>H-NMR of compound 3c.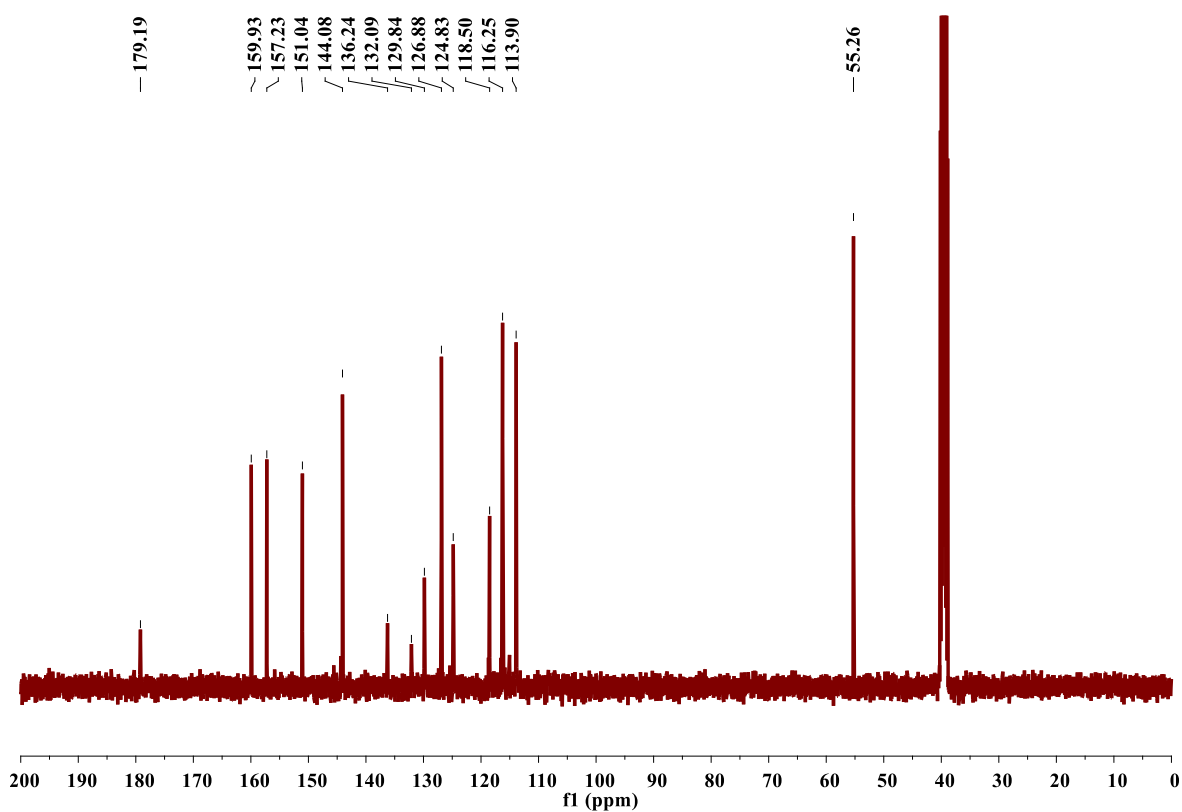Figure S39. <sup>13</sup>C-NMR of compound 3c.

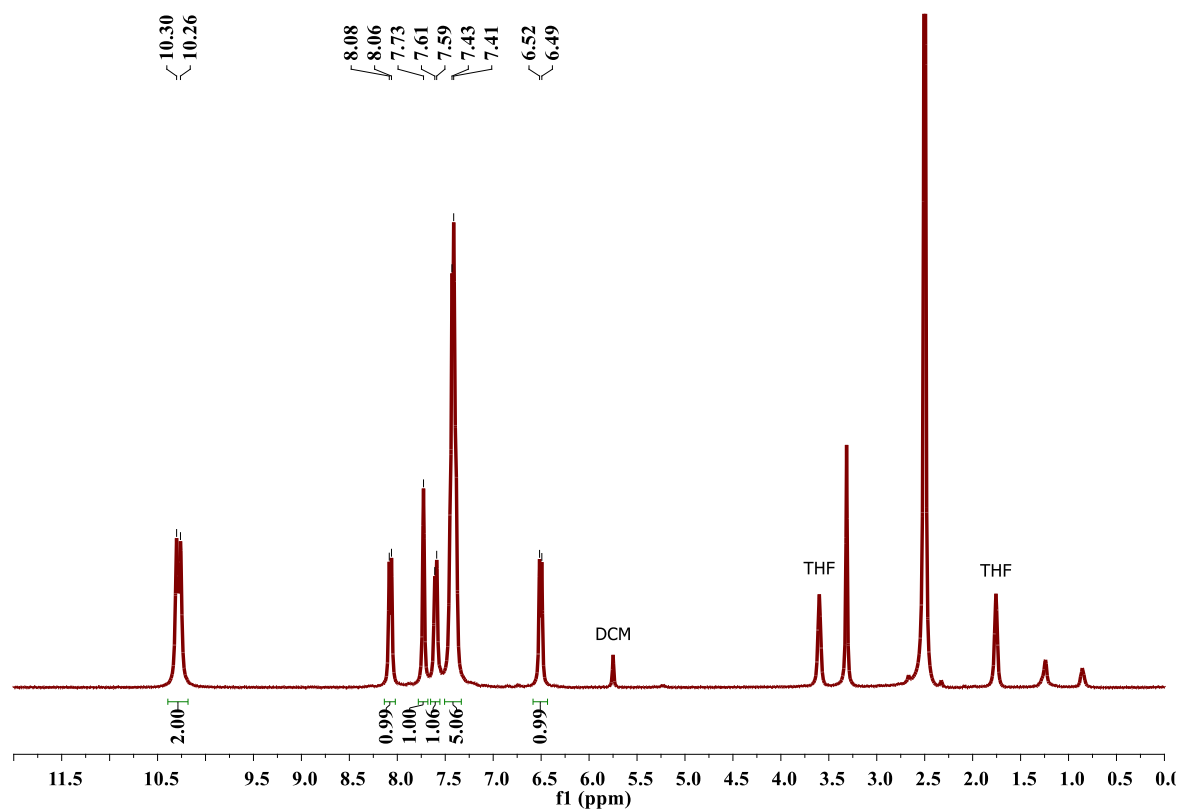Figure S40. <sup>1</sup>H-NMR of compound 3d.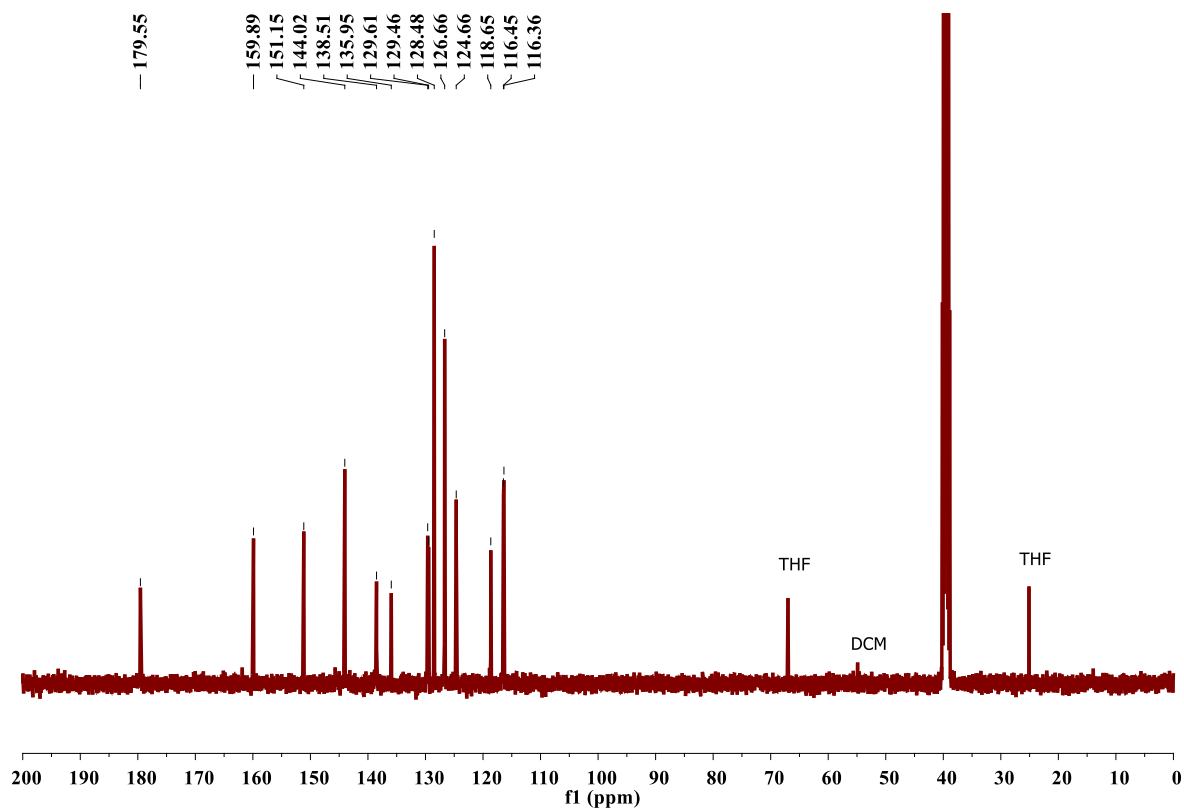Figure S41. <sup>13</sup>C-NMR of compound 3d.

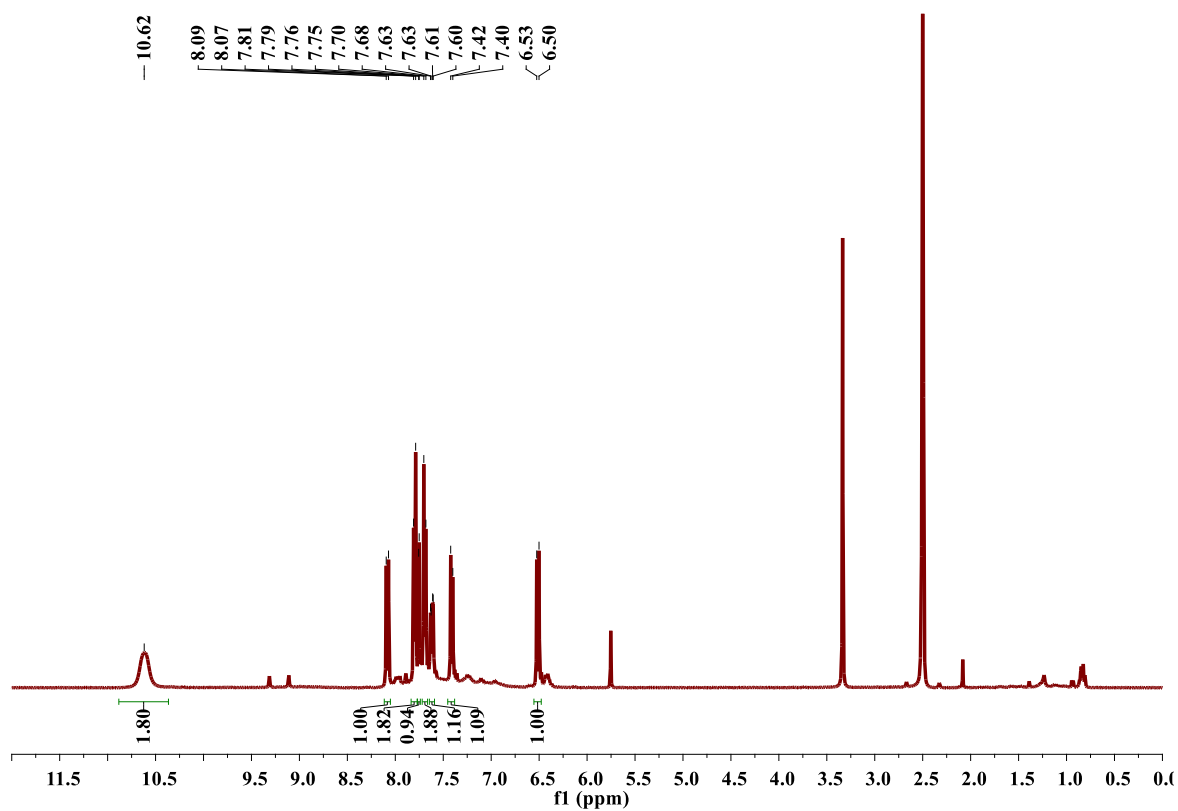Figure S42. <sup>1</sup>H-NMR of compound 3e.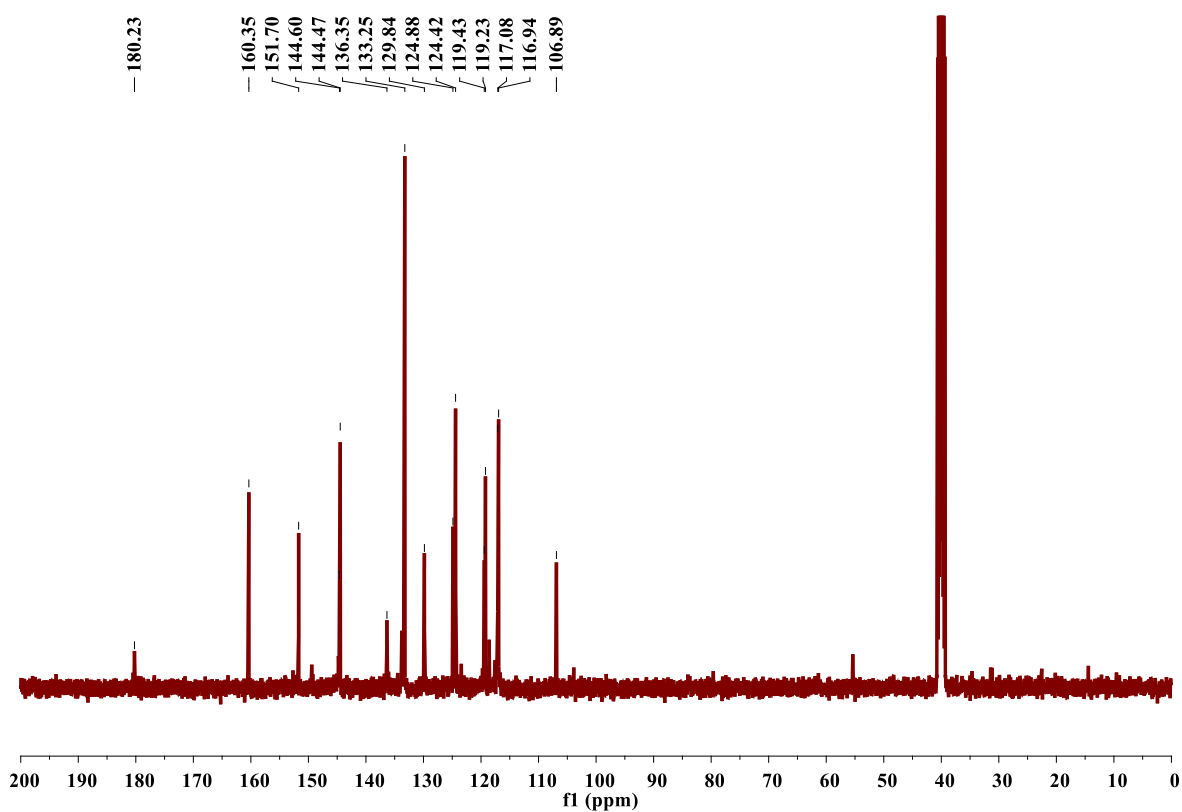Figure S43. <sup>13</sup>C-NMR of compound 3e.

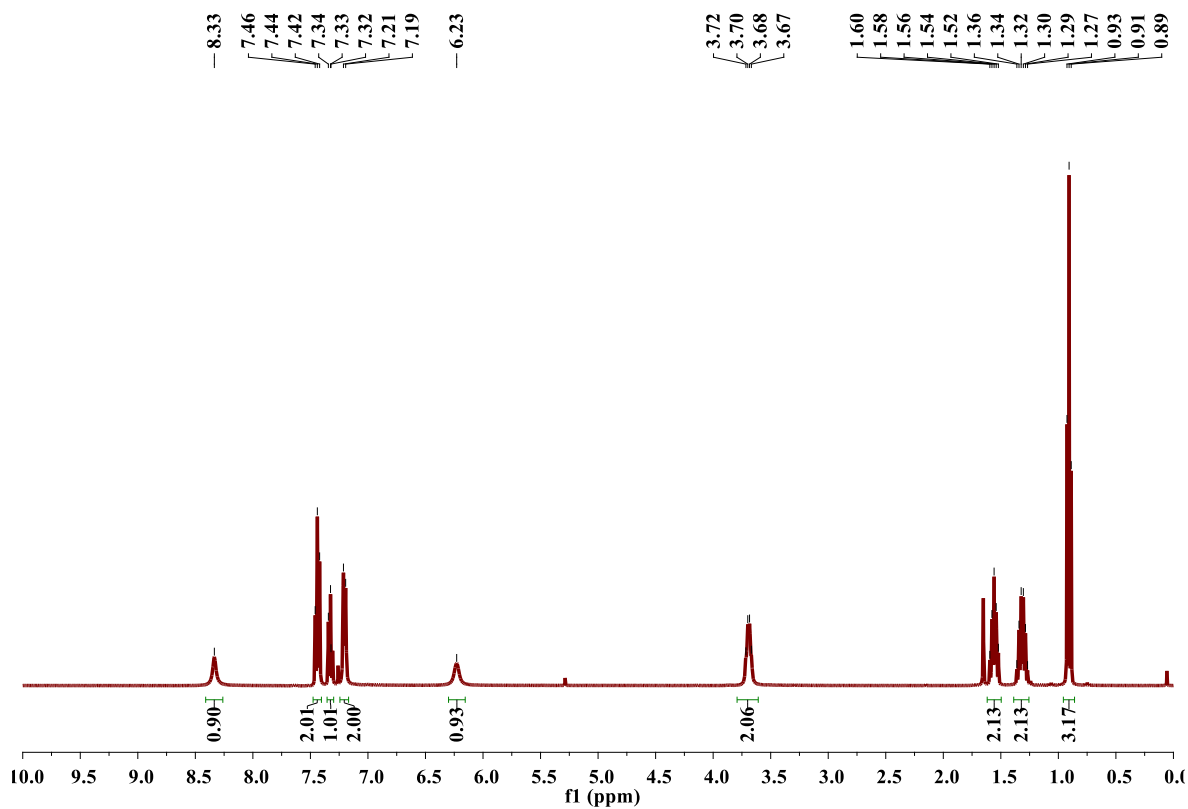Figure S44. <sup>1</sup>H-NMR of compound 4a.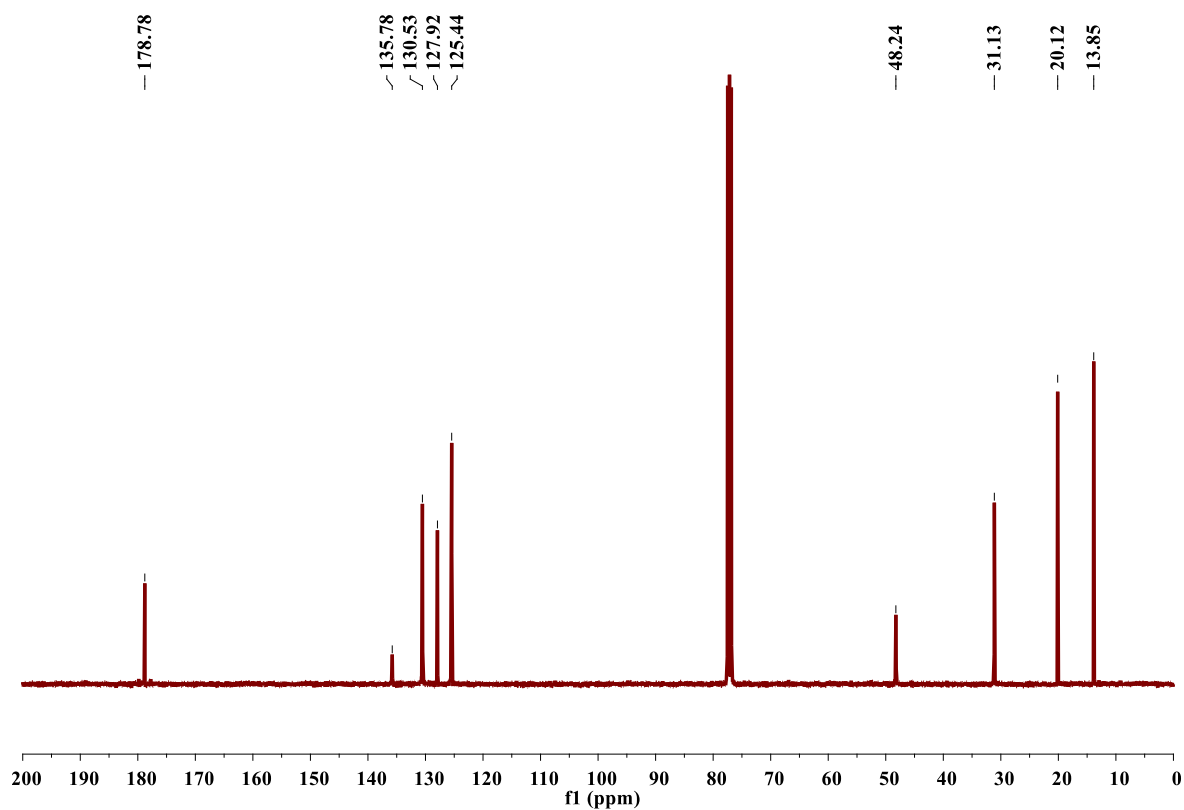Figure S45. <sup>13</sup>C-NMR of compound 4a.

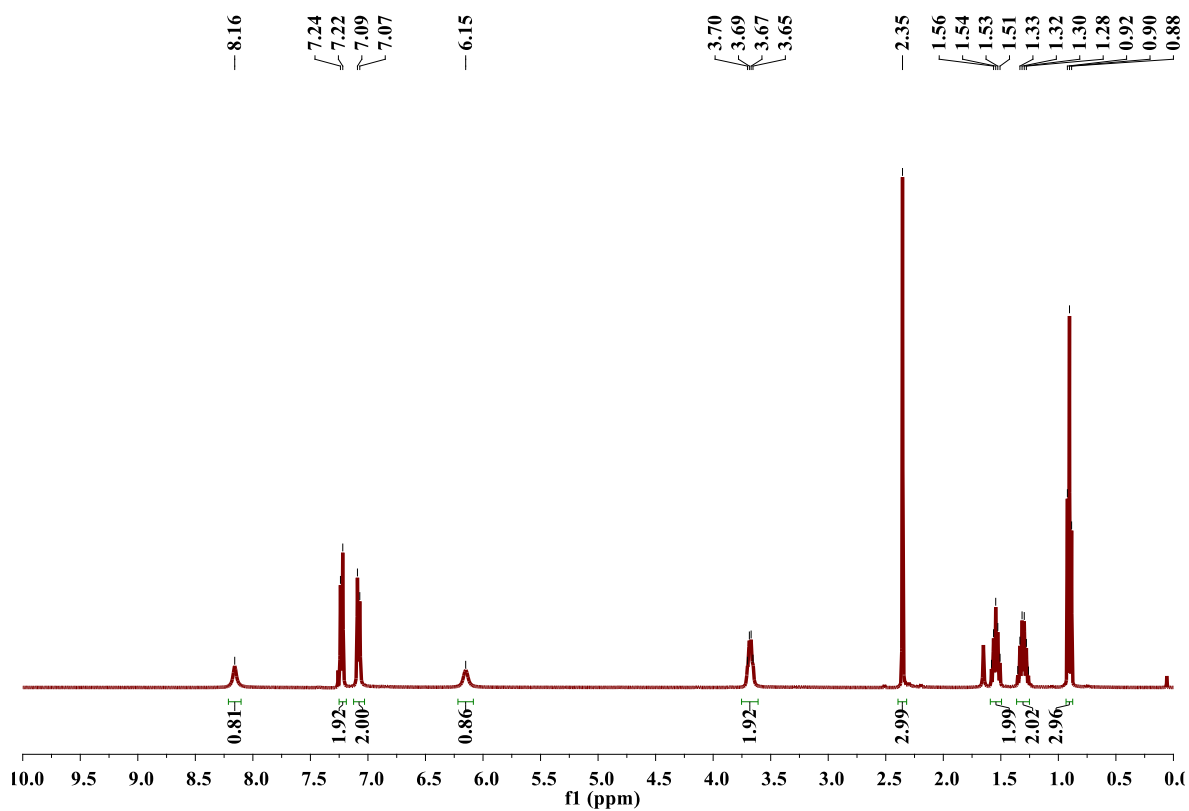Figure S46. <sup>1</sup>H-NMR of compound 4b.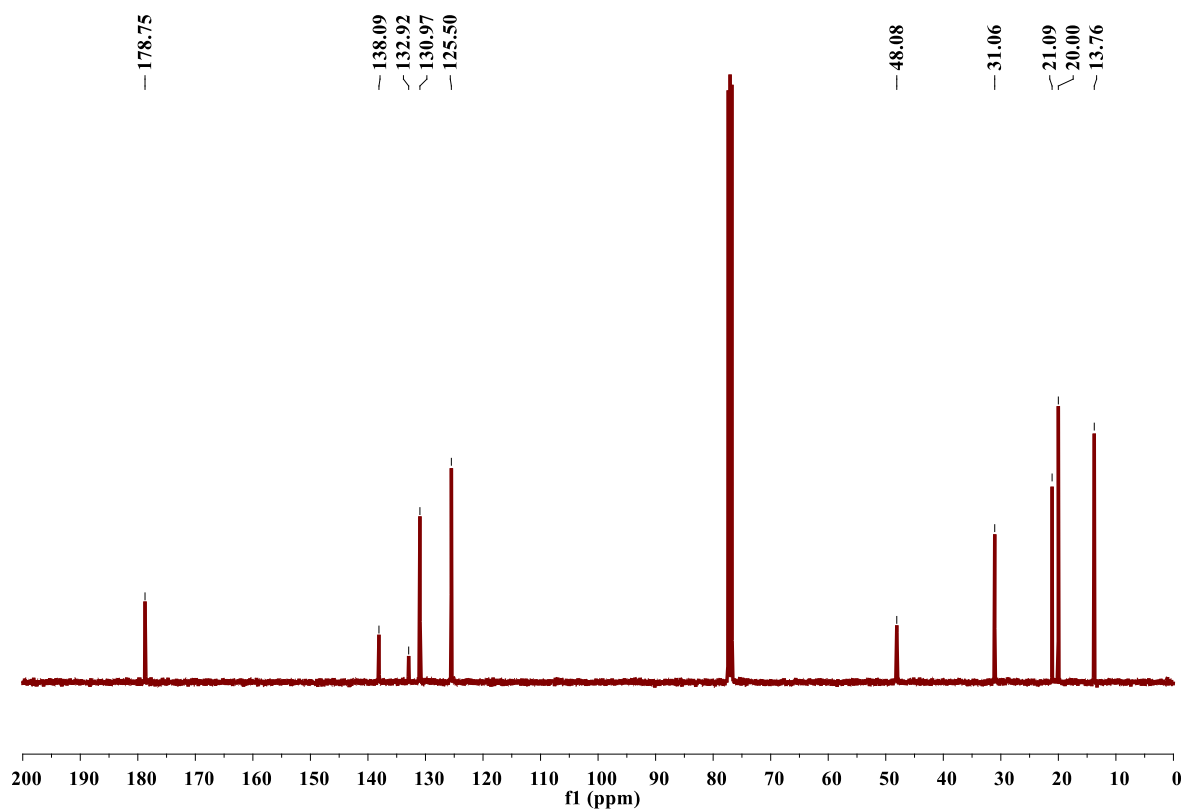Figure S47. <sup>13</sup>C-NMR of compound 4b.



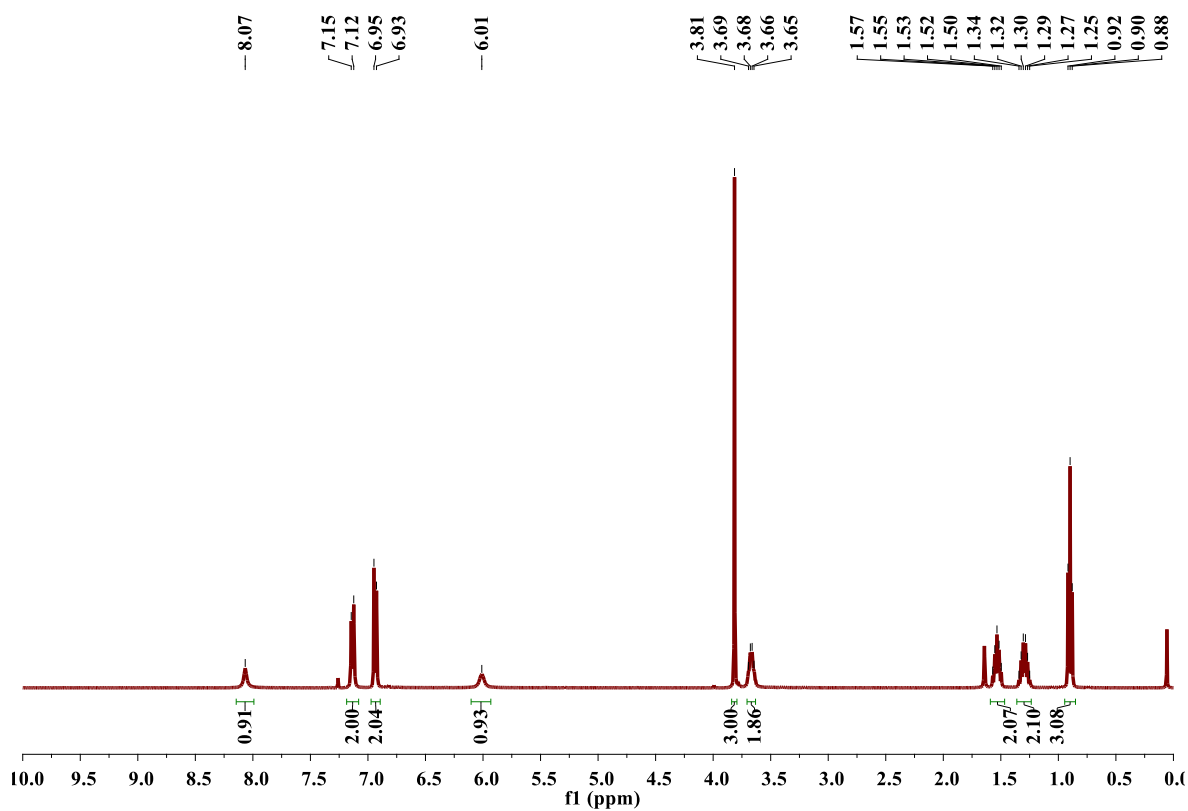Figure S48. <sup>1</sup>H-NMR of compound 4c.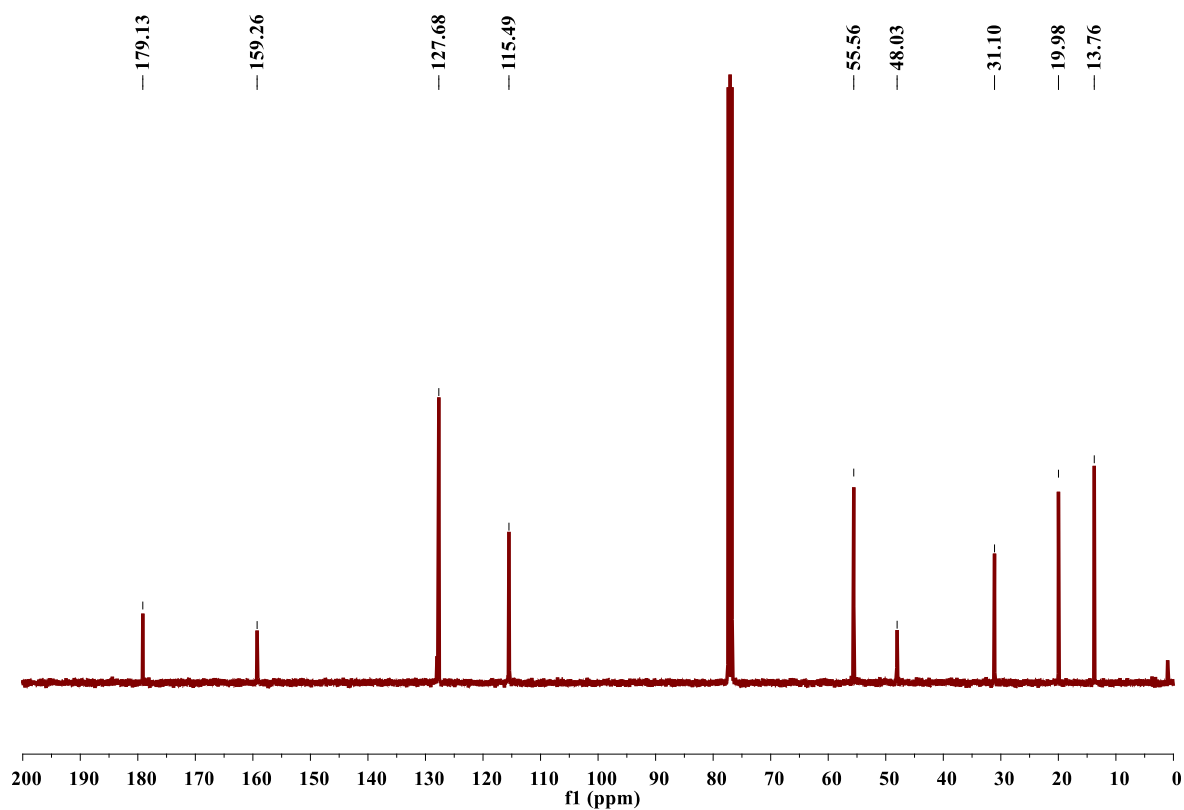Figure S49. <sup>13</sup>C-NMR of compound 4c.

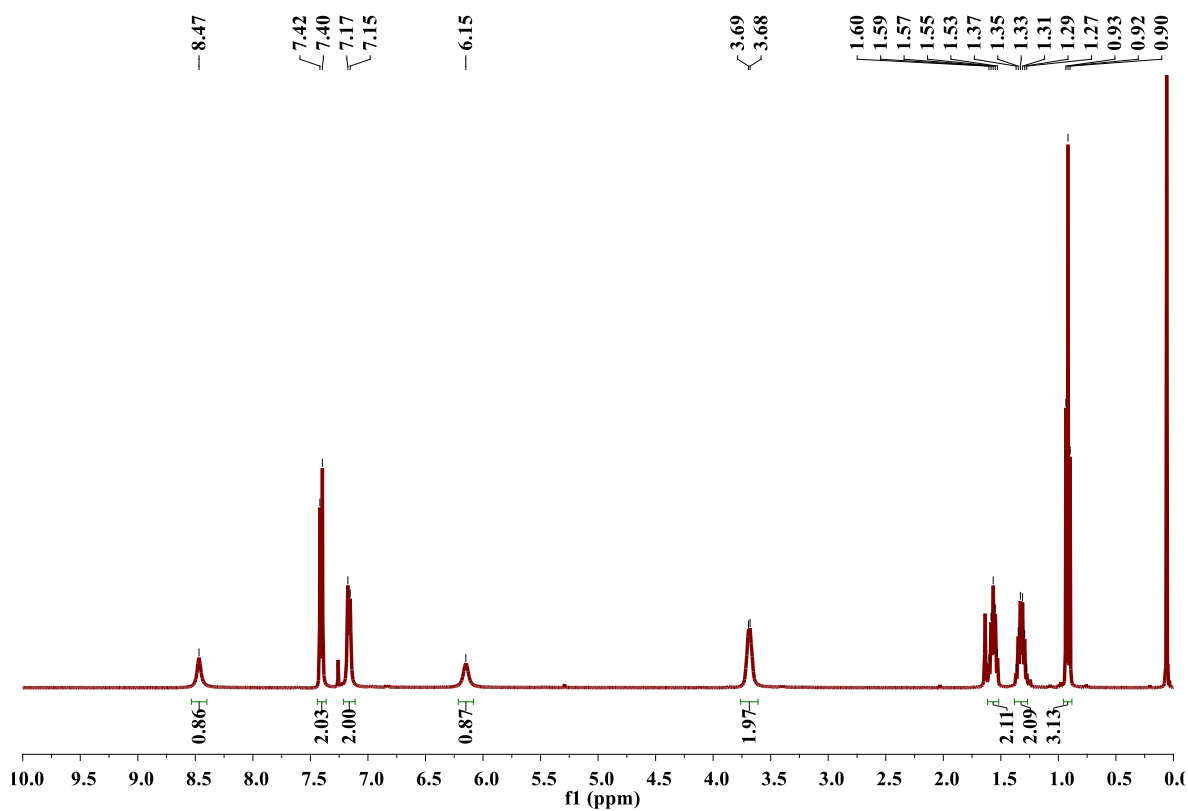Figure S50. <sup>1</sup>H-NMR of compound 4d.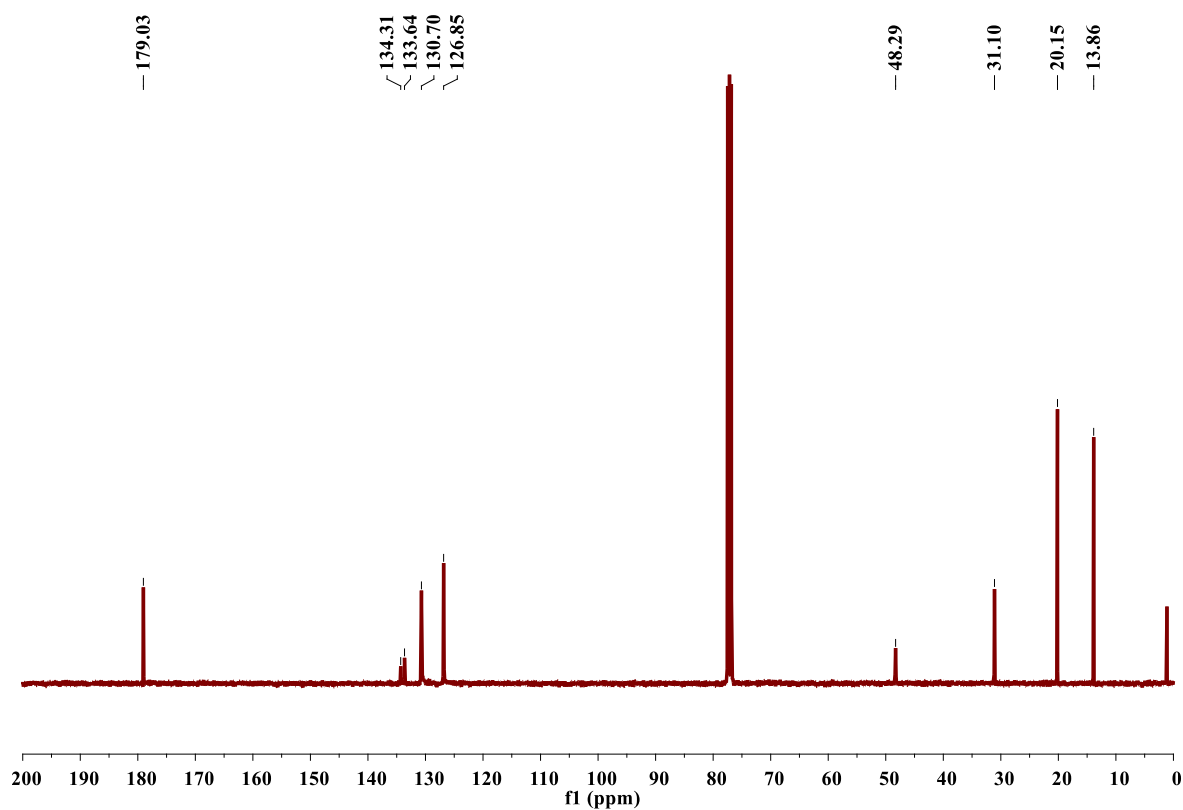Figure S51. <sup>13</sup>C-NMR of compound 4d.

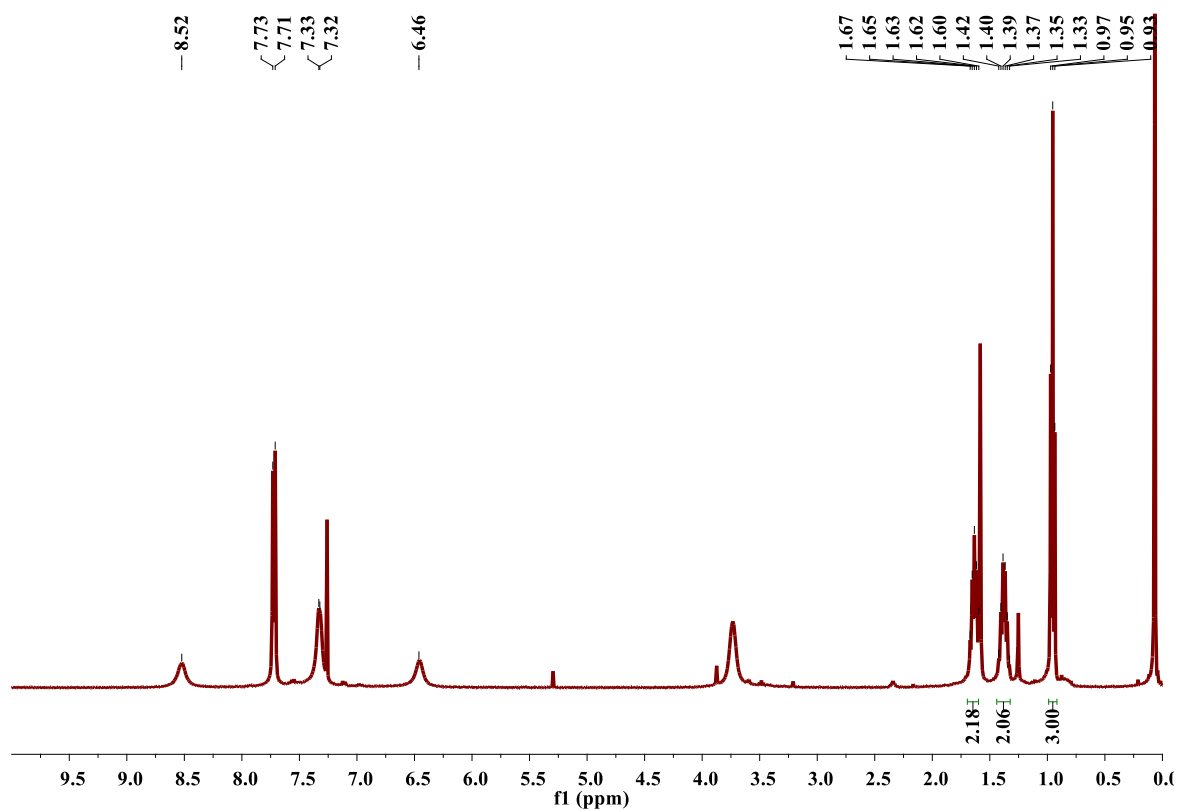Figure S52.  $^1\text{H}$ -NMR of compound 4e.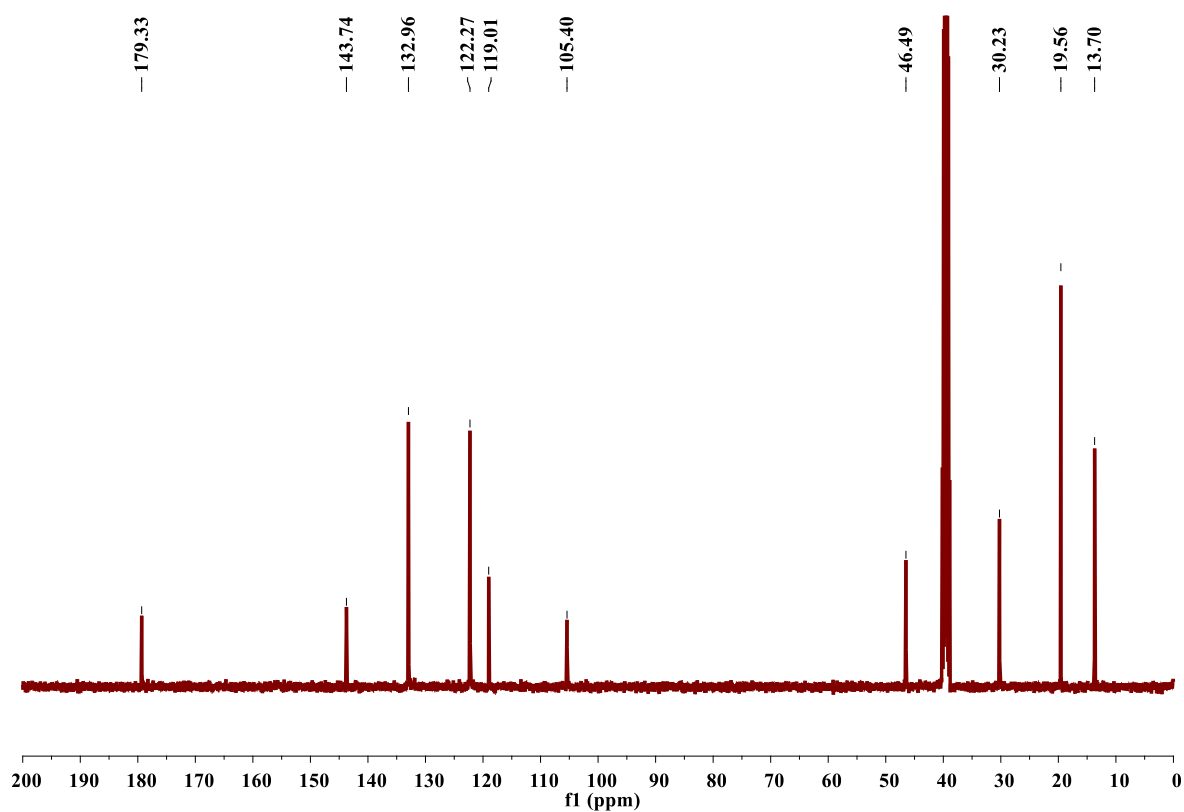Figure S53.  $^{13}\text{C}$ -NMR of compound 4e.

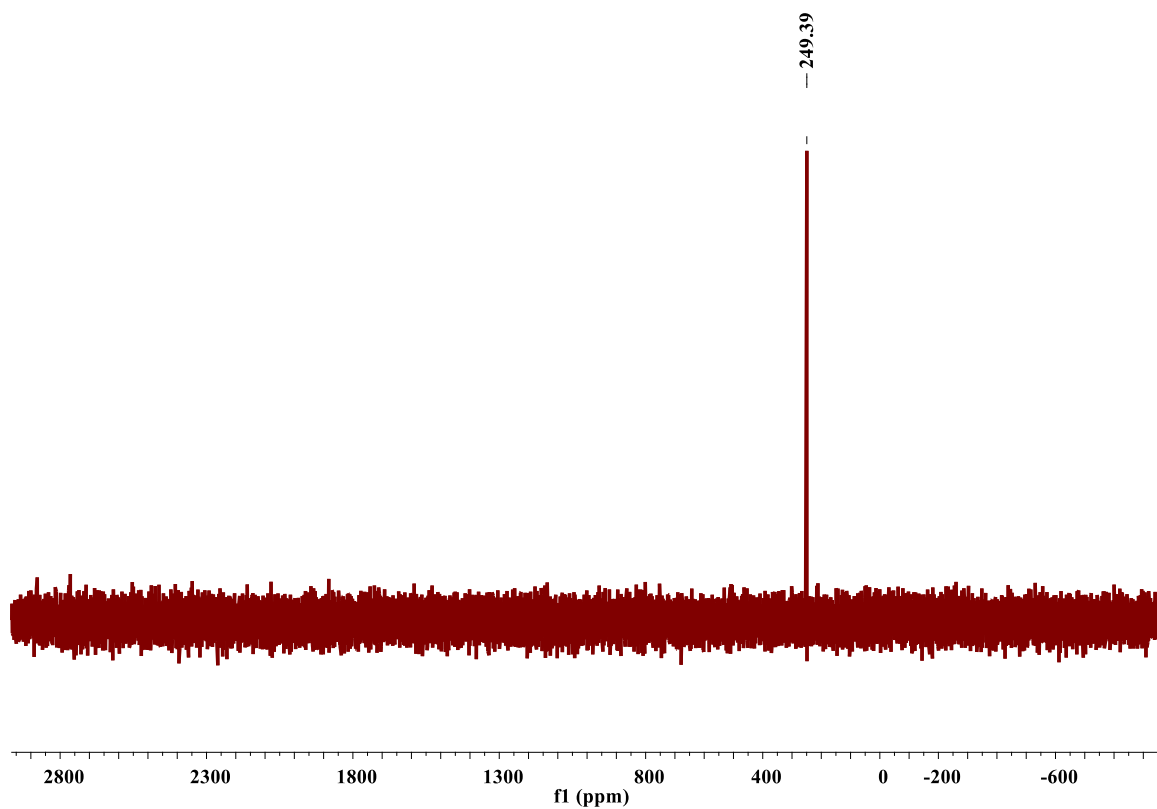Figure S54.  $^{77}\text{Se}$ -NMR of compound 4e.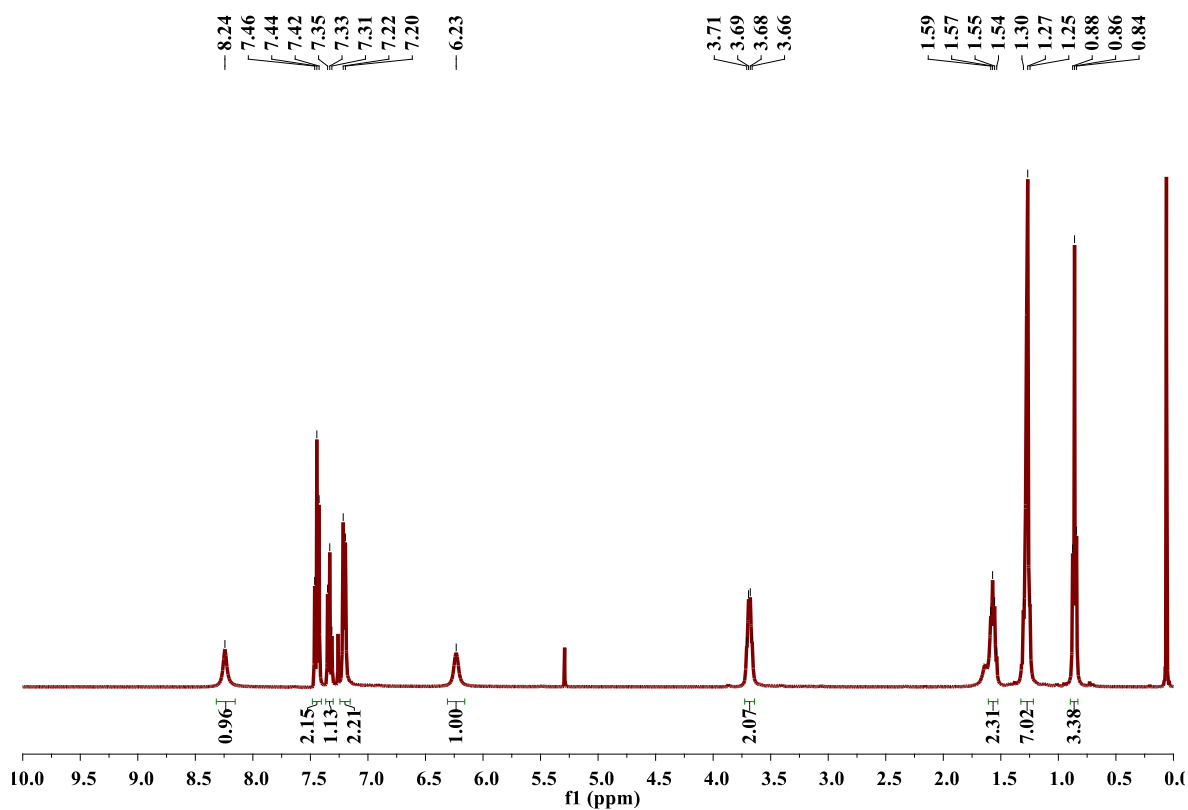Figure S55.  $^1\text{H}$ -NMR of compound 5a.

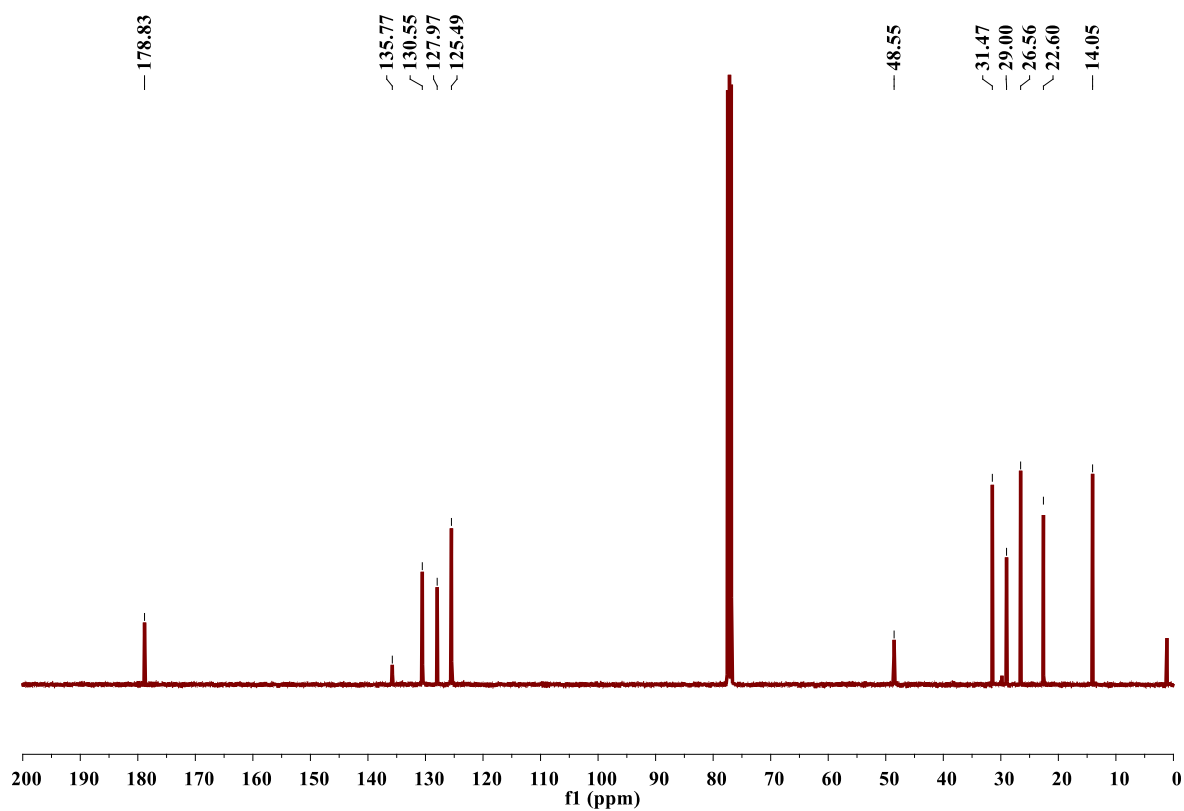Figure S56.  $^{13}\text{C}$ -NMR of compound 5a.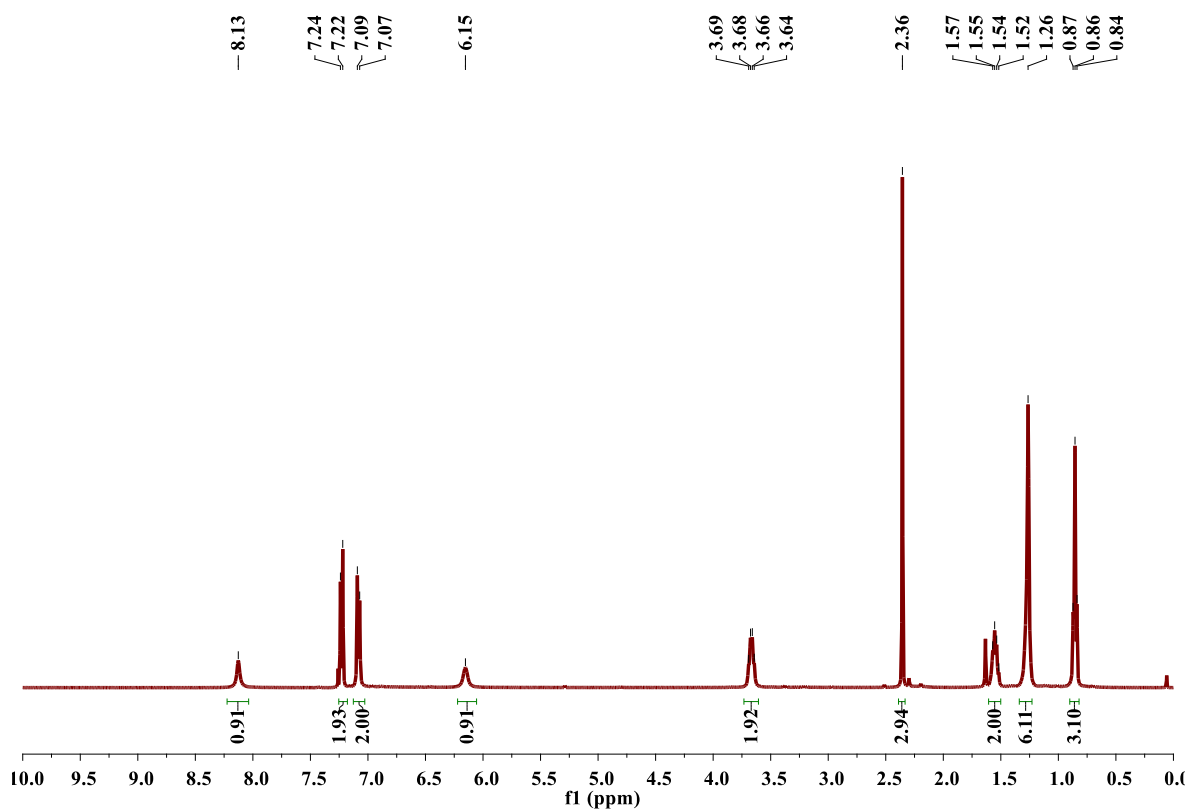Figure S57.  $^1\text{H}$ -NMR of compound 5b.

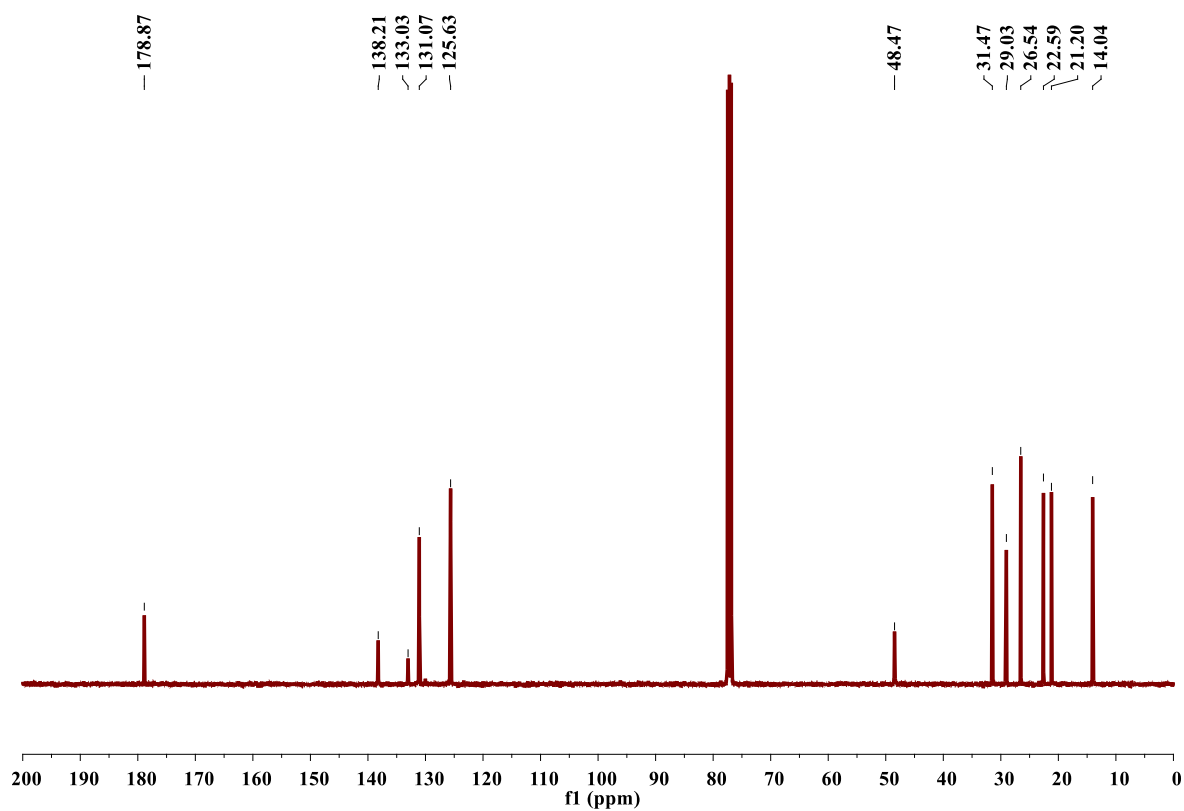Figure S58. <sup>13</sup>C-NMR of compound 5b.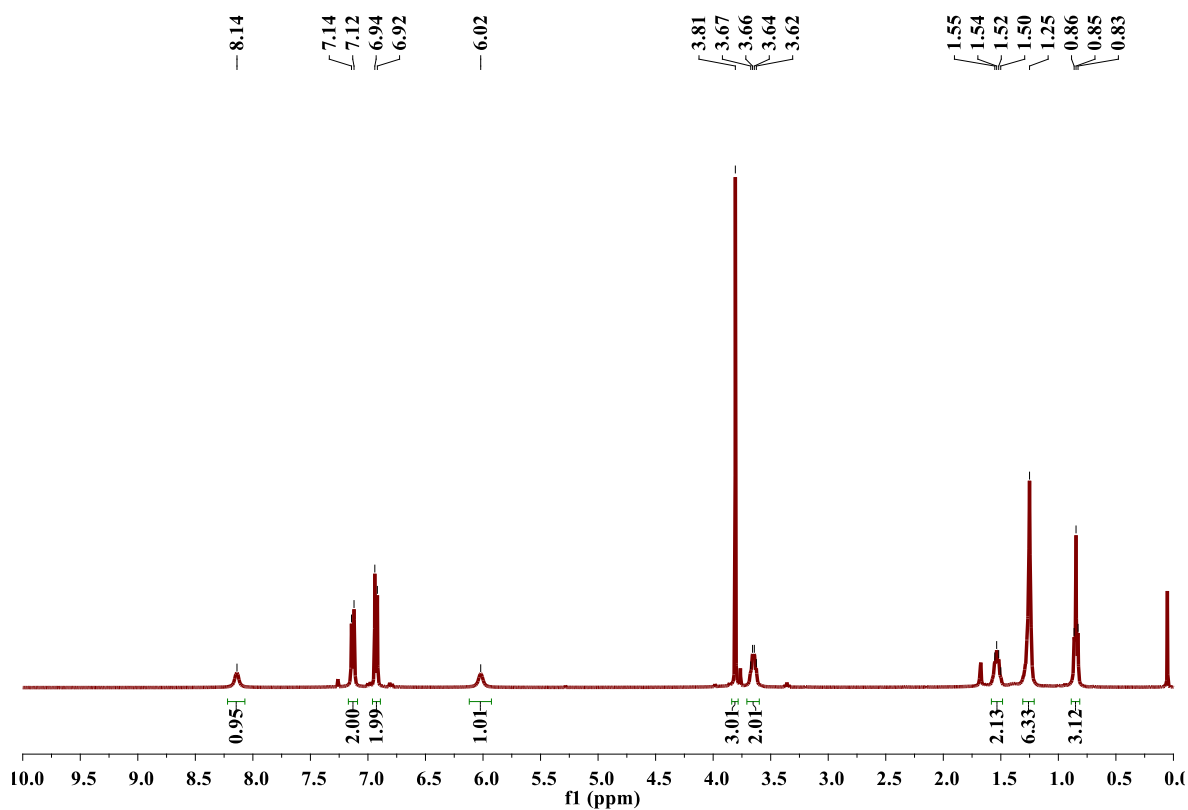Figure S59. <sup>1</sup>H-NMR of compound 5c.

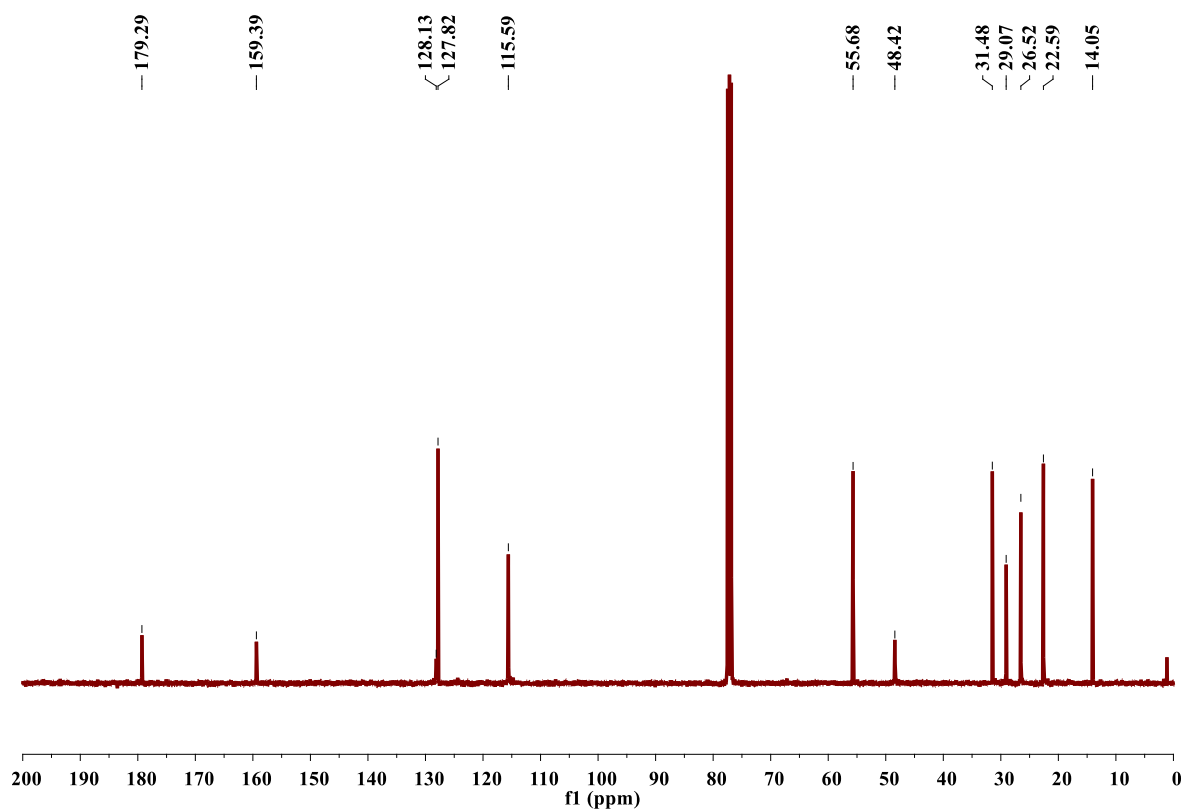

Figure S60.  $^{13}\text{C}$ -NMR of compound 5c.

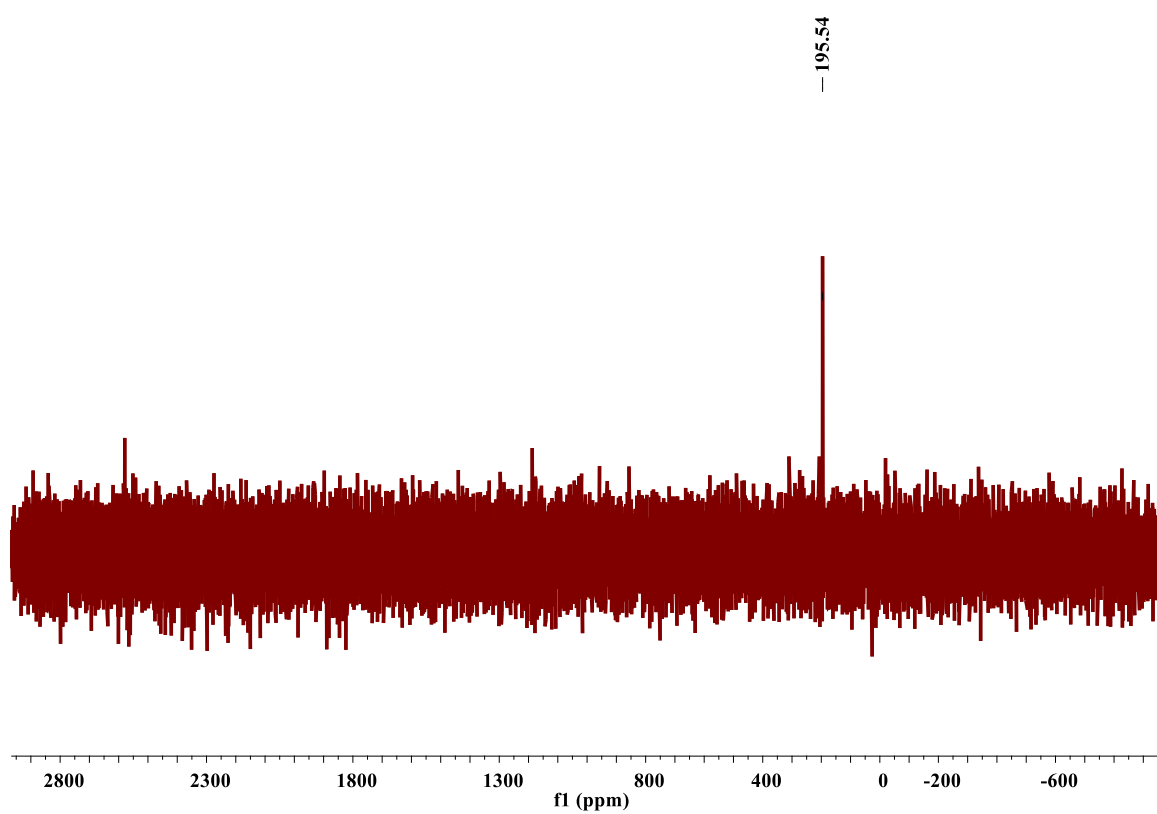

Figure S61.  $^{77}\text{Se}$ -NMR of compound 5c.

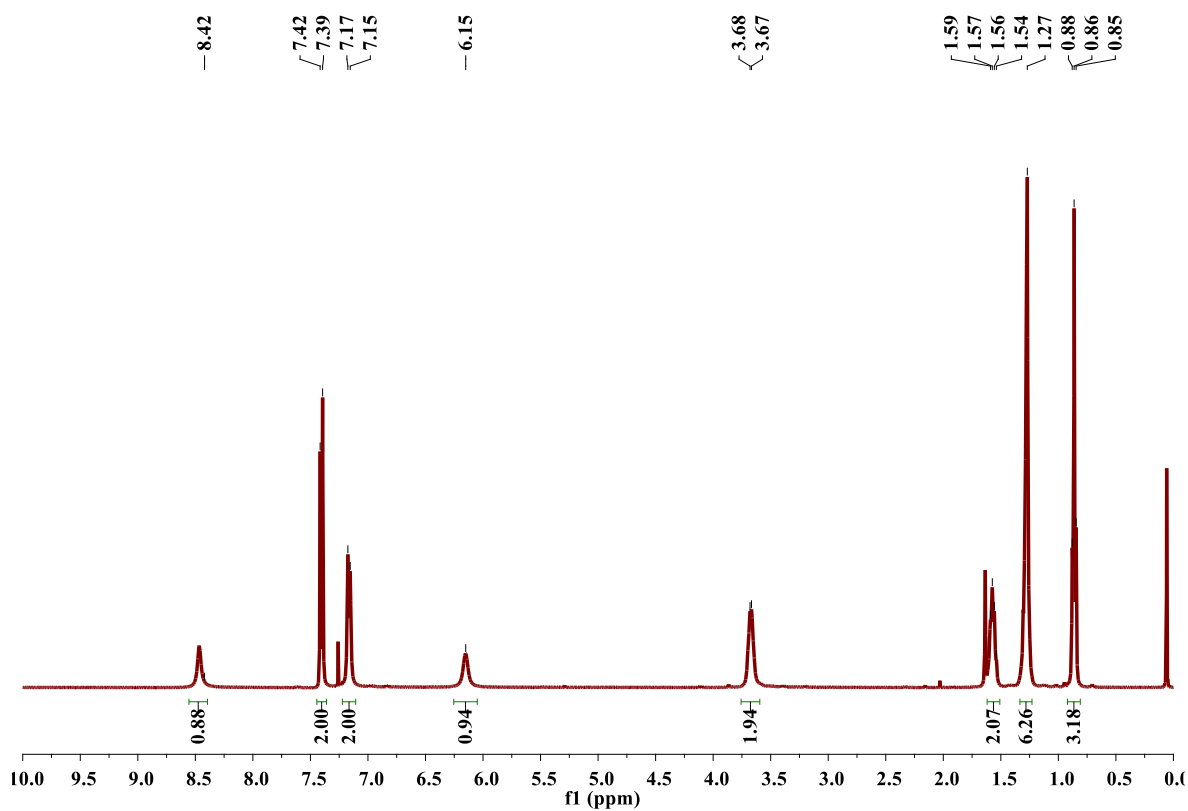Figure S62. <sup>1</sup>H-NMR of compound 5d.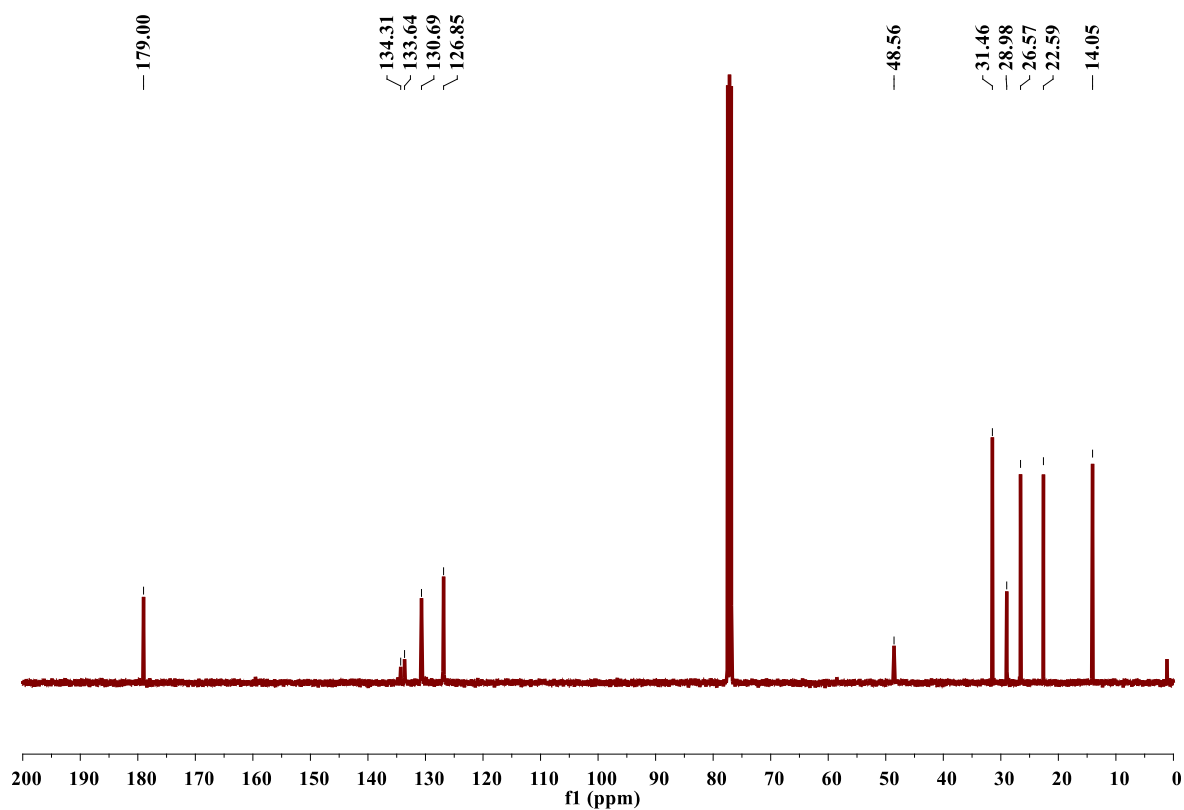Figure S63. <sup>13</sup>C-NMR of compound 5d.



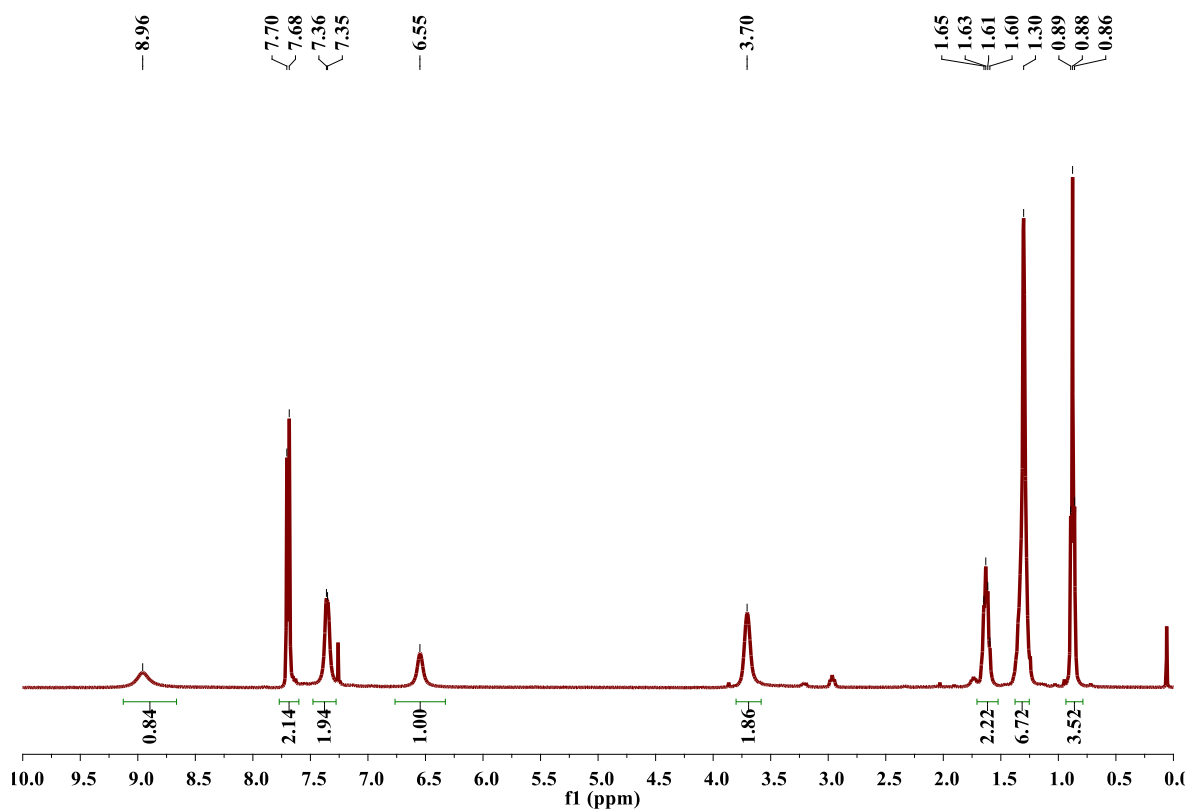Figure S64. <sup>1</sup>H-NMR of compound 5e.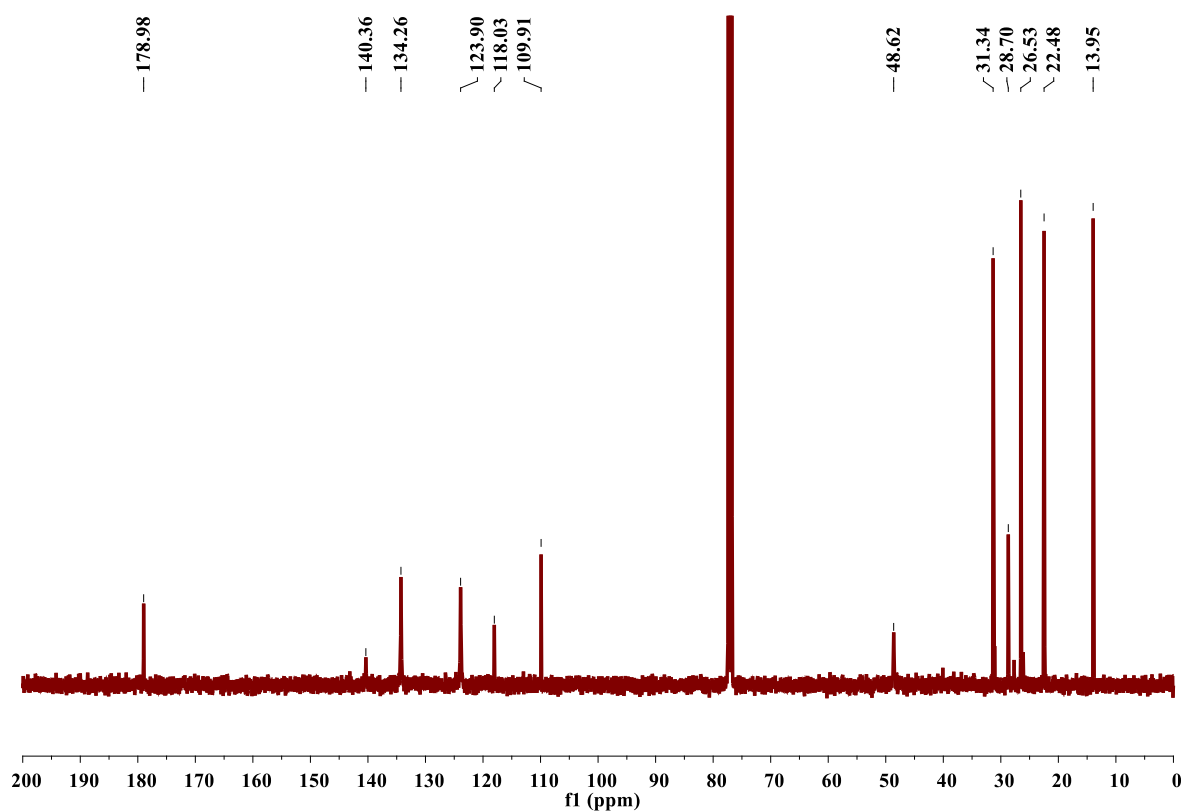Figure S65. <sup>13</sup>C-NMR of compound 5e.

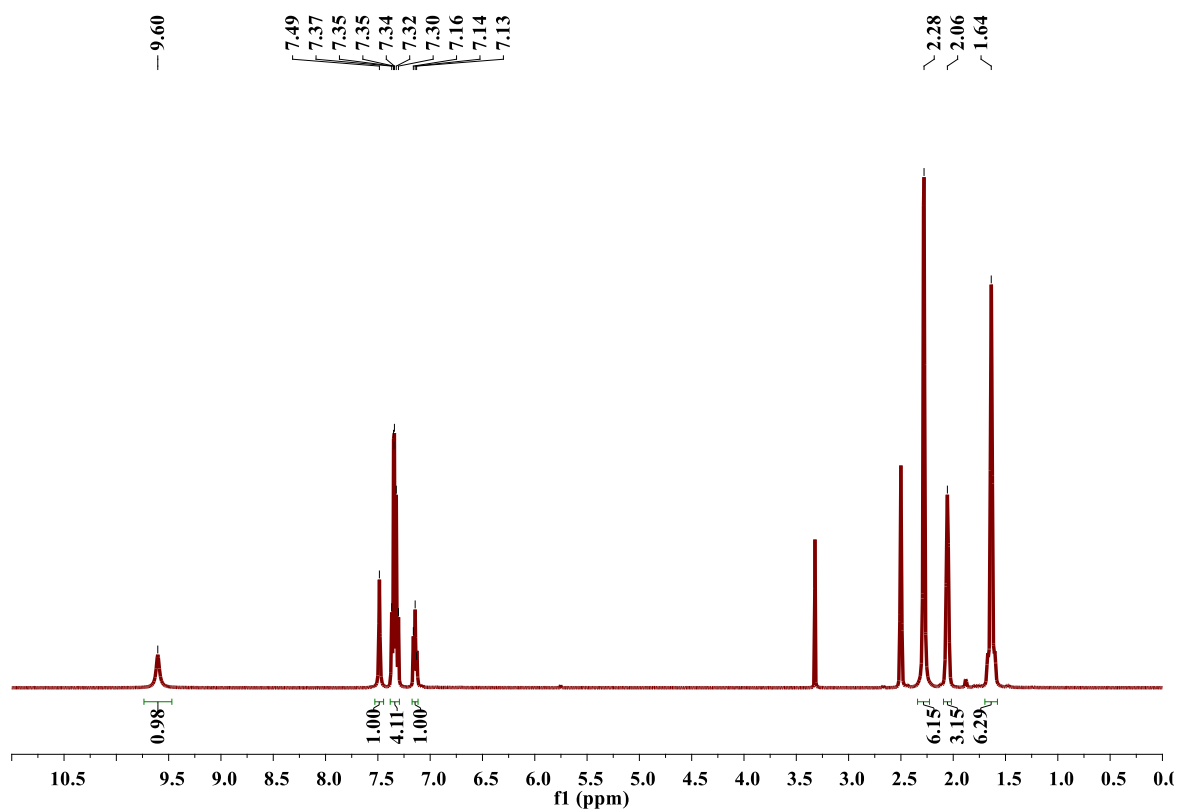Figure S66. <sup>1</sup>H-NMR of compound 6a.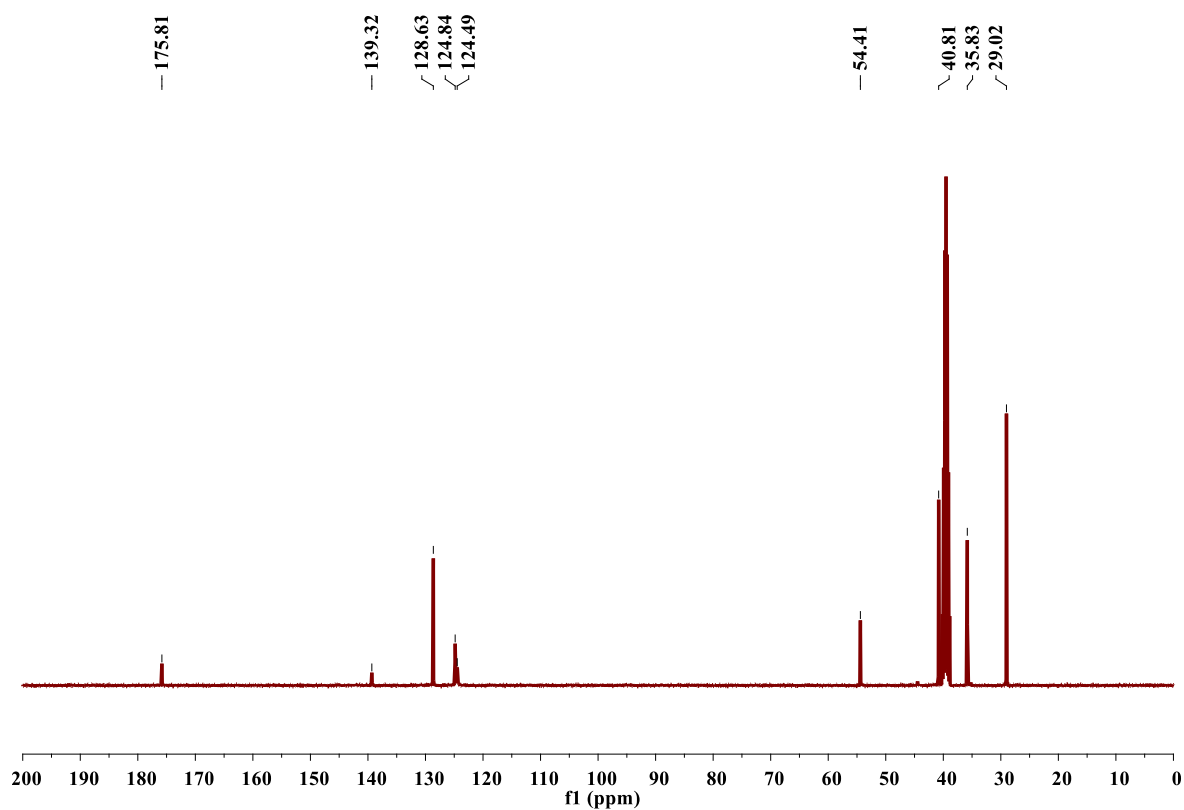Figure S67. <sup>13</sup>C-NMR of compound 6a.

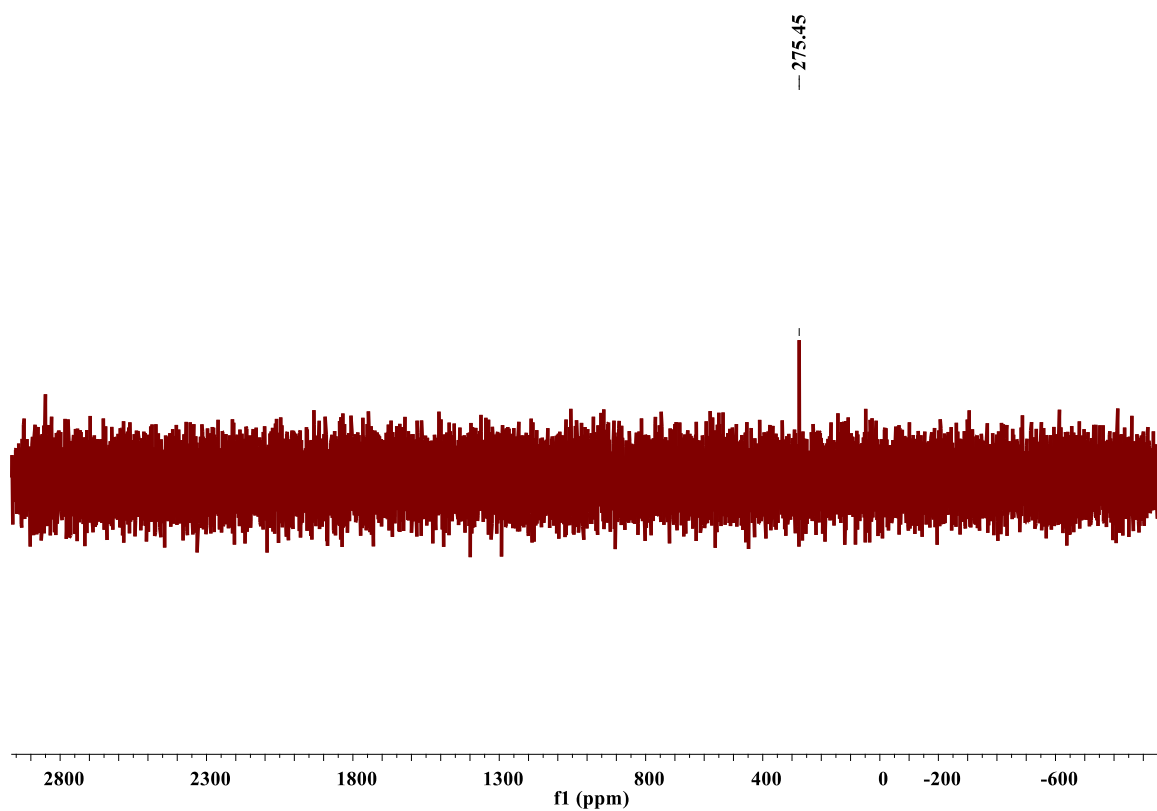

Figure S68.  $^{77}\text{Se}$ -NMR of compound 6a.

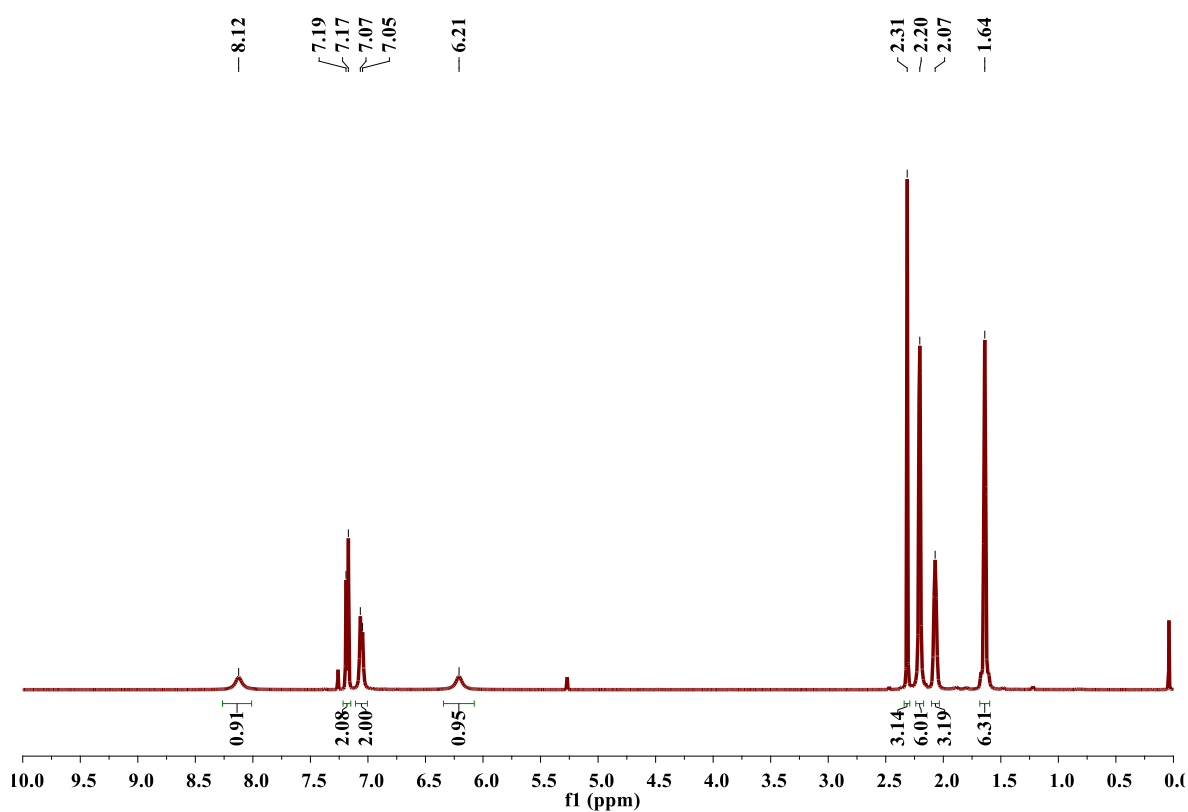

Figure S69.  $^1\text{H}$ -NMR of compound 6b.

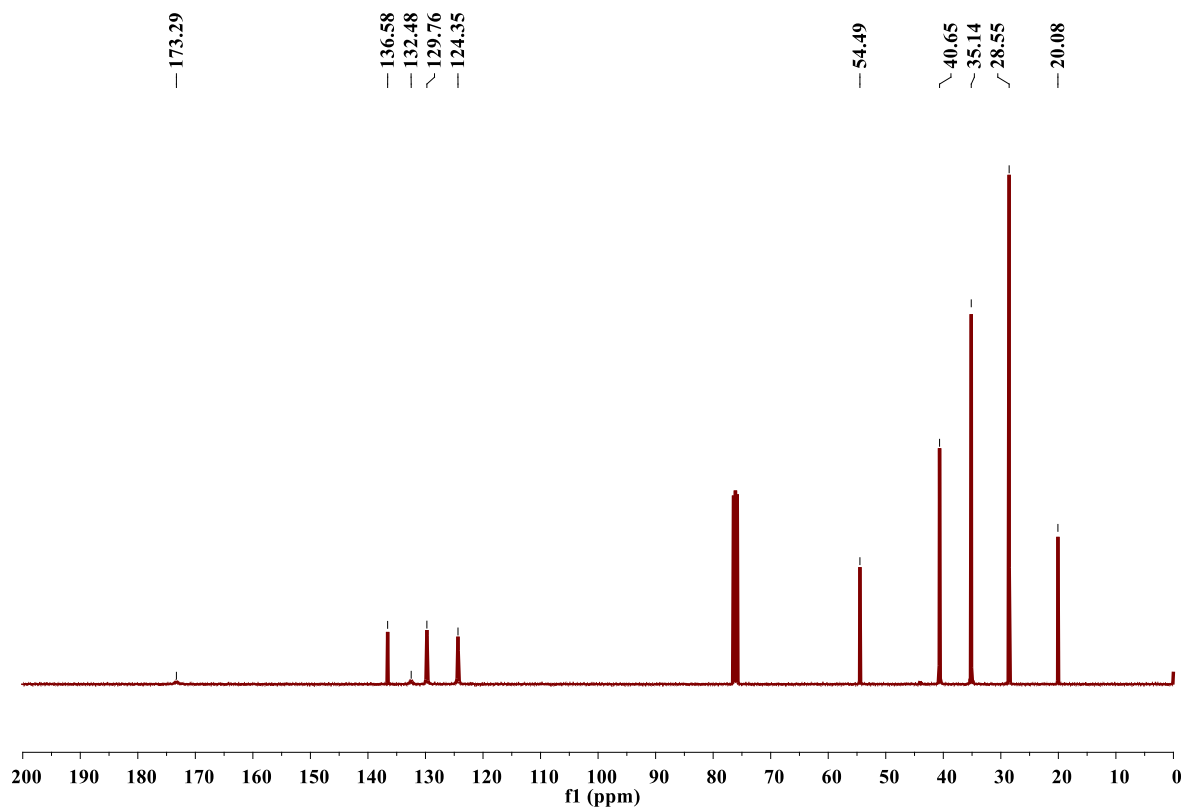

Figure S70. <sup>13</sup>C-NMR of compound **6b**.

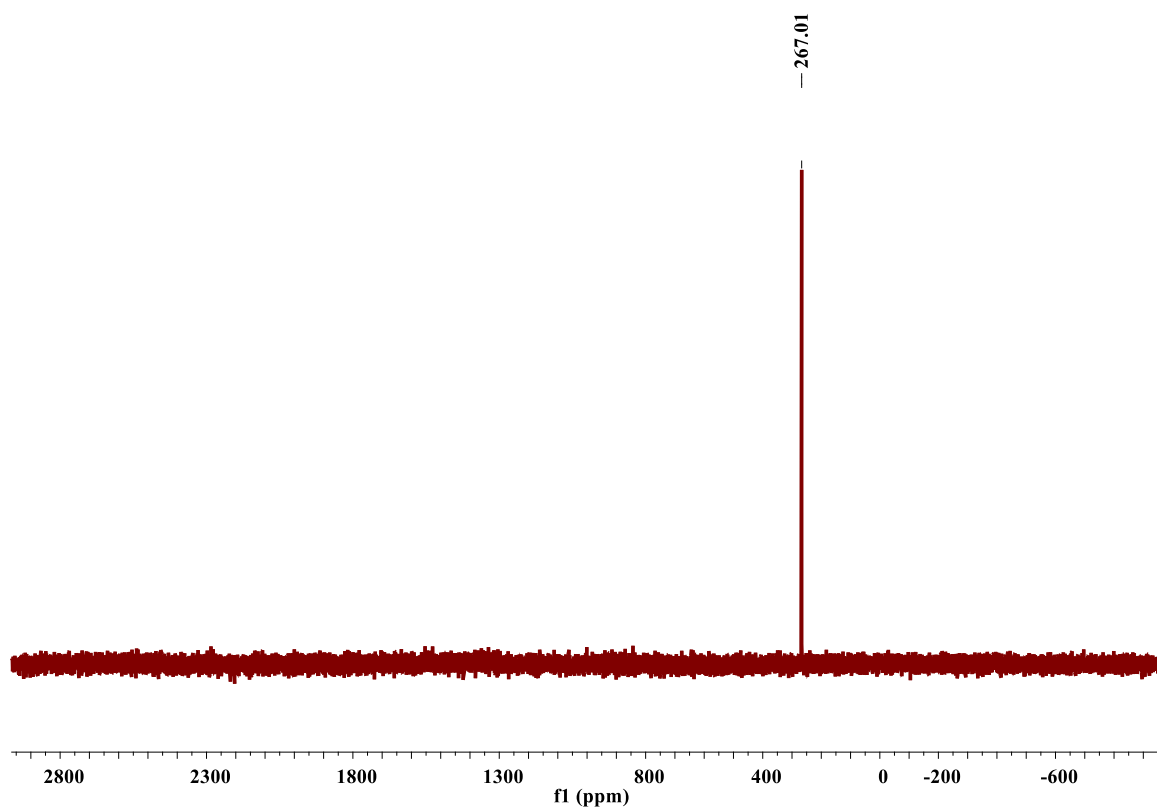

Figure S71. <sup>77</sup>Se-NMR of compound **6b**.

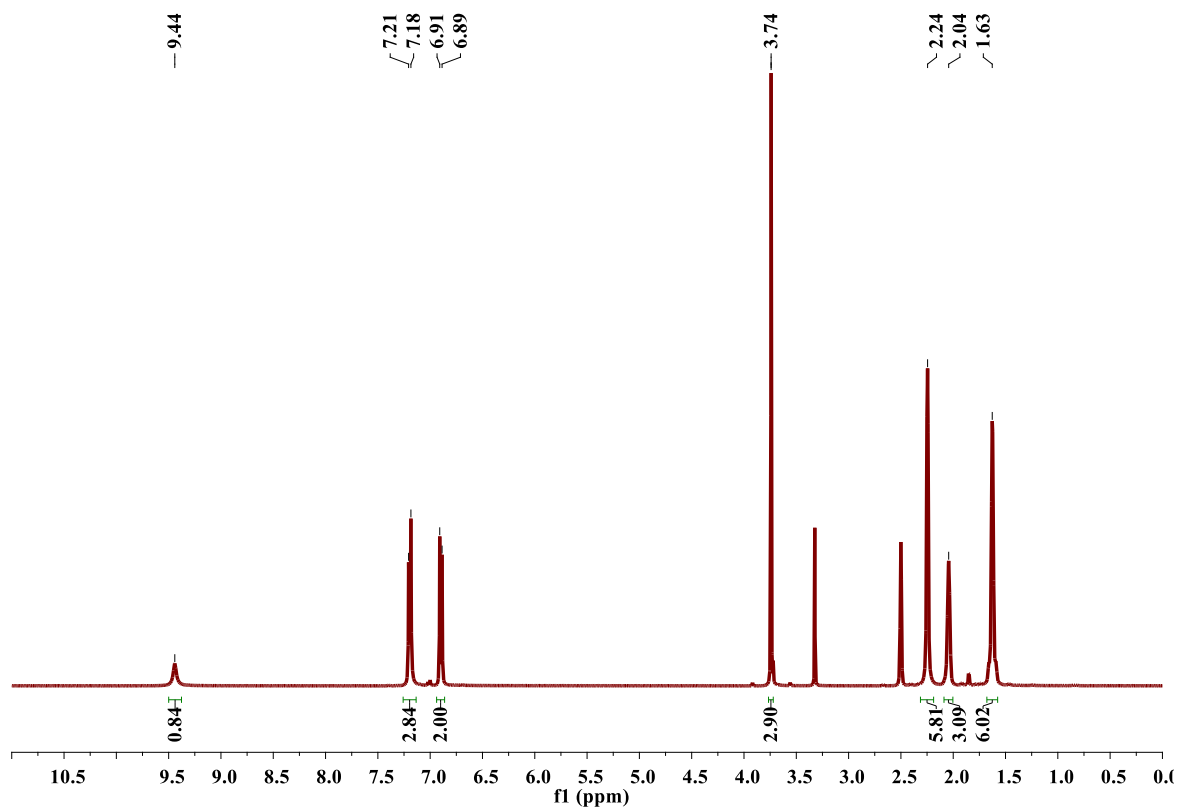Figure S72. <sup>1</sup>H-NMR of compound 6c.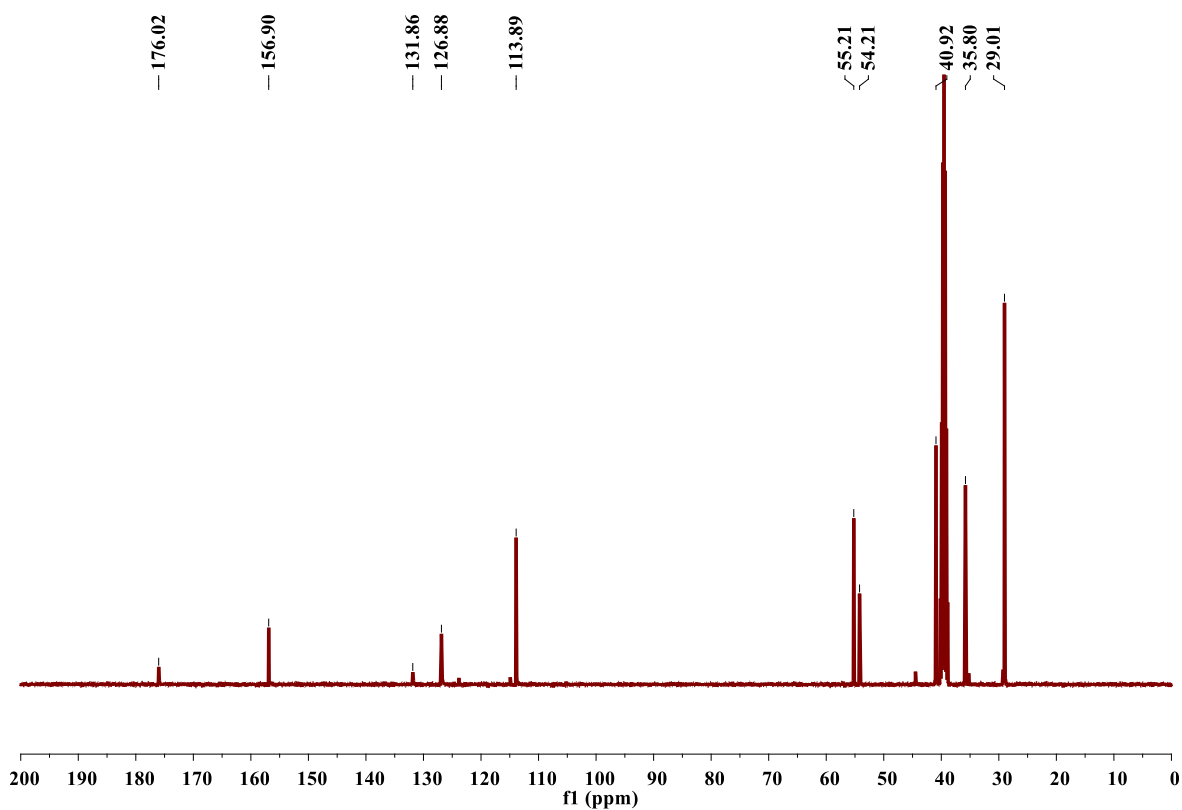Figure S73. <sup>13</sup>C-NMR of compound 6c.

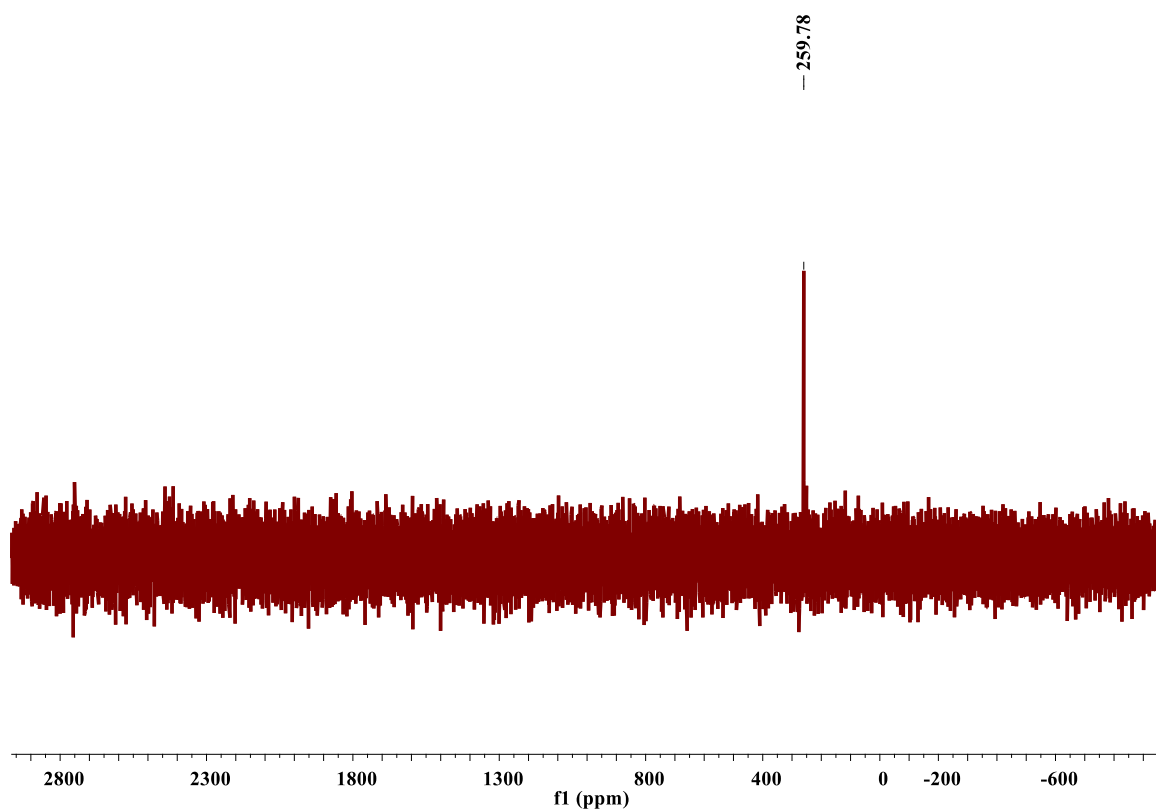

Figure S74.  $^{77}\text{Se}$ -NMR of compound 6c.

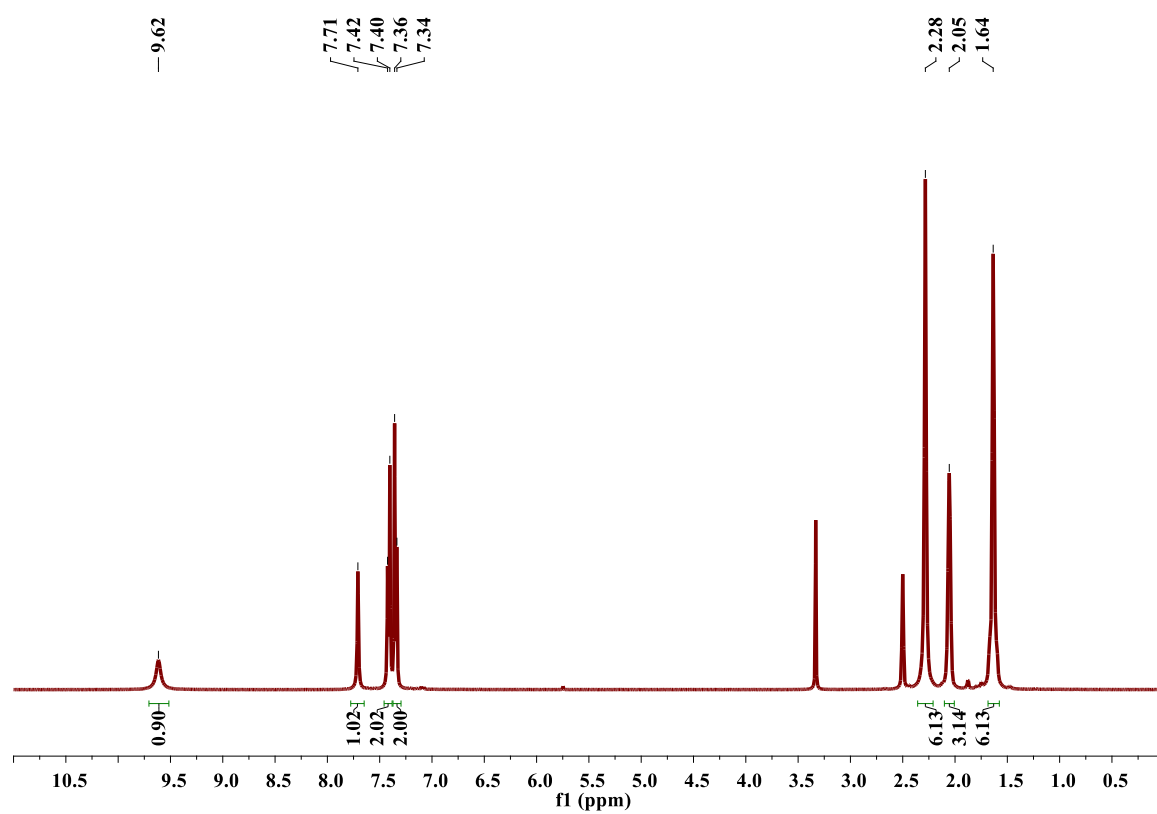

Figure S75.  $^1\text{H}$ -NMR of compound 6d.

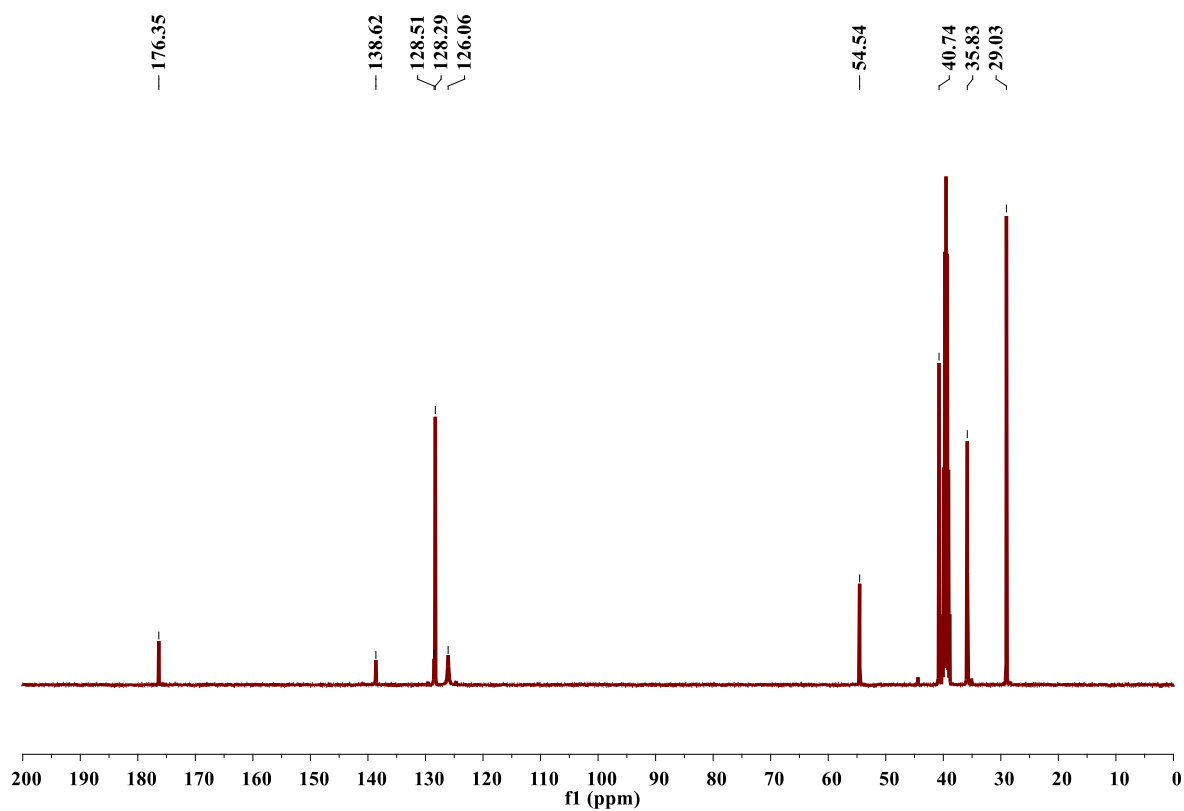

Figure S76.  $^{13}\text{C}$ -NMR of compound **6d**.

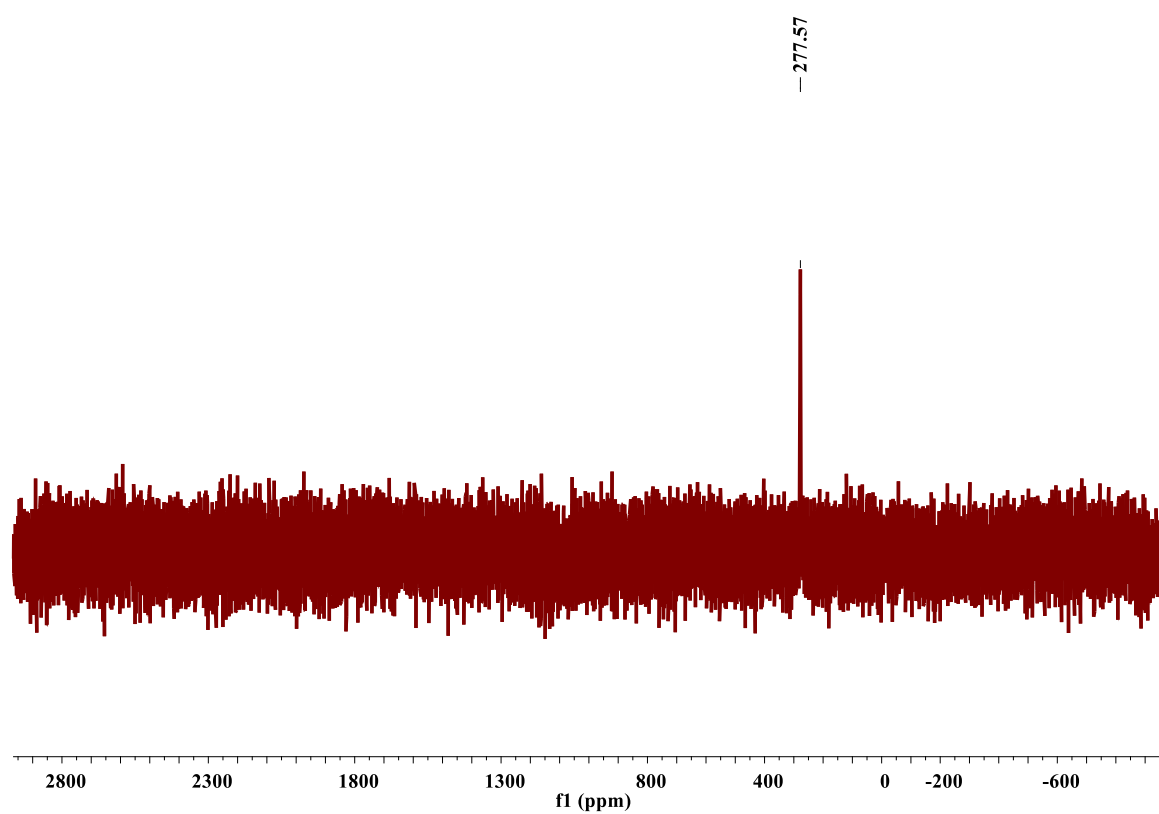

Figure S77.  $^{77}\text{Se}$ -NMR of compound **6d**.

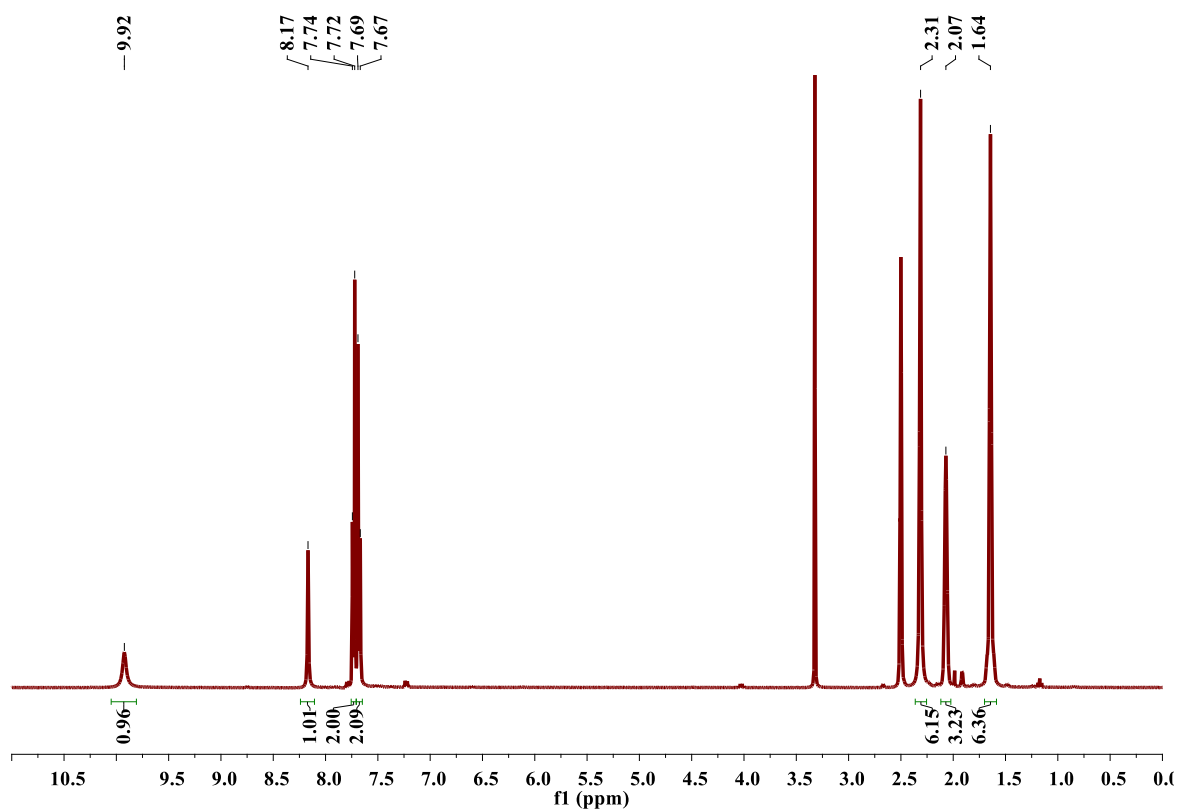Figure S78. <sup>1</sup>H-NMR of compound 6e.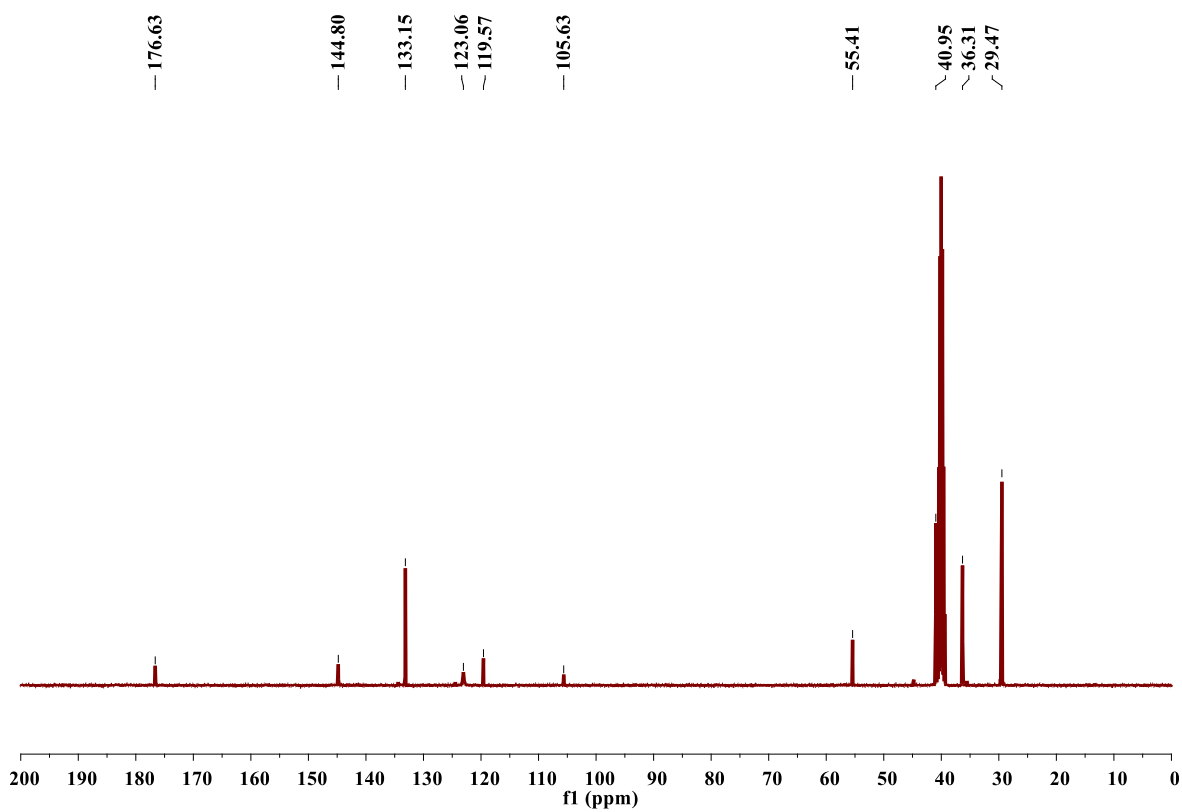Figure S79. <sup>13</sup>C-NMR of compound 6e.



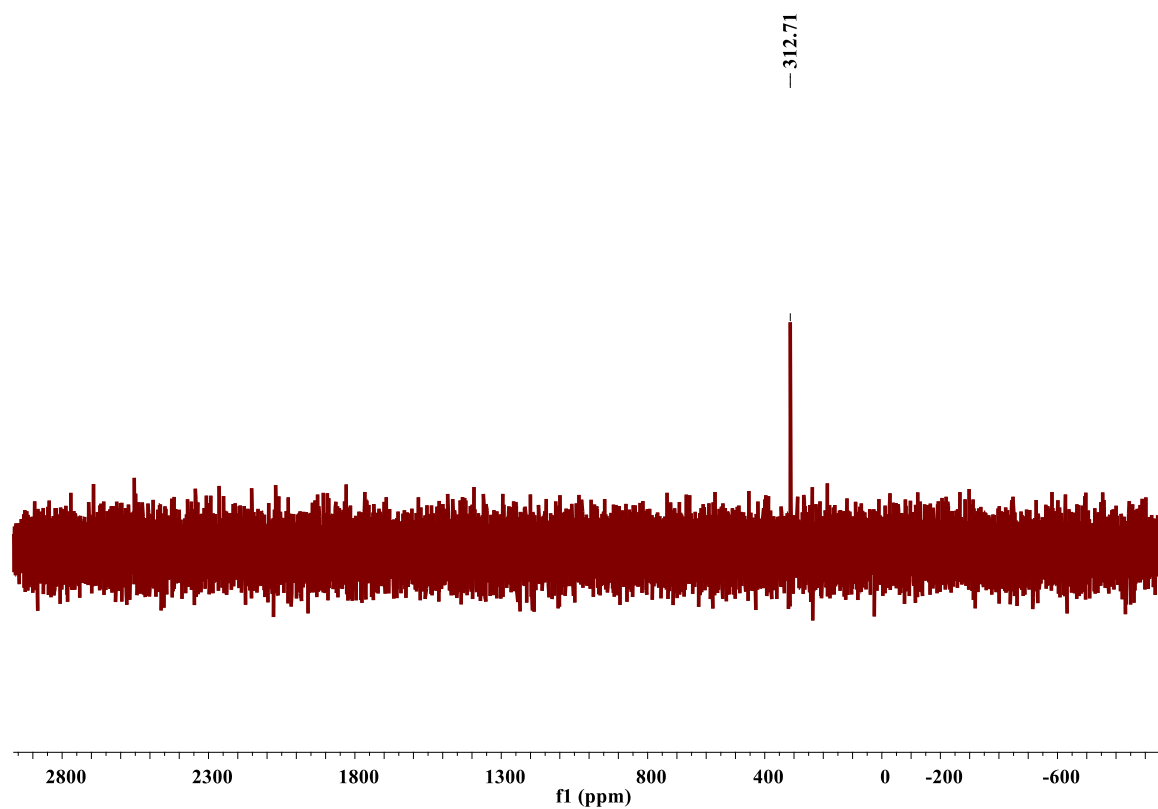

**Figure S80.**  $^{77}\text{Se}$ -NMR of compound **6e**.

## Supplementary data for DPPH and ABTS assays.

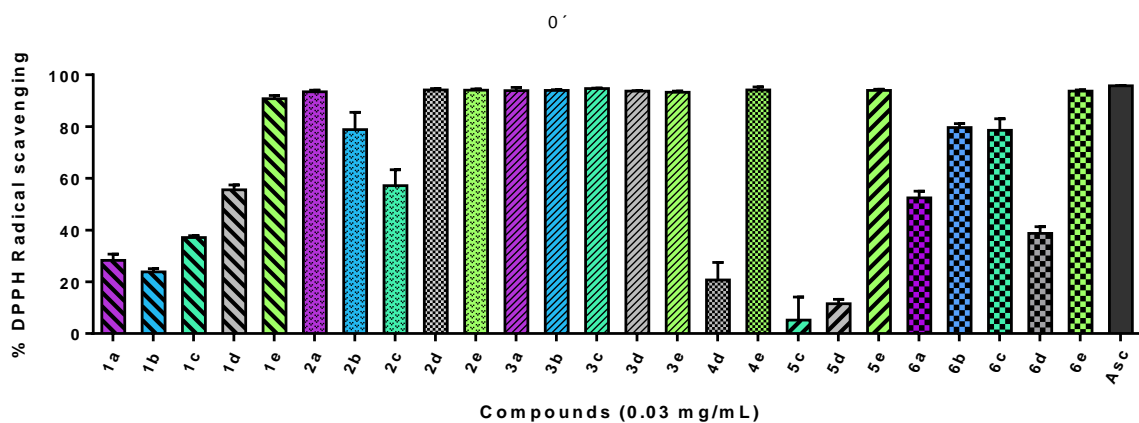

Figure S81. DPPH Radical scavenging activity at 0.03 mg/mL and after 0 minutes.

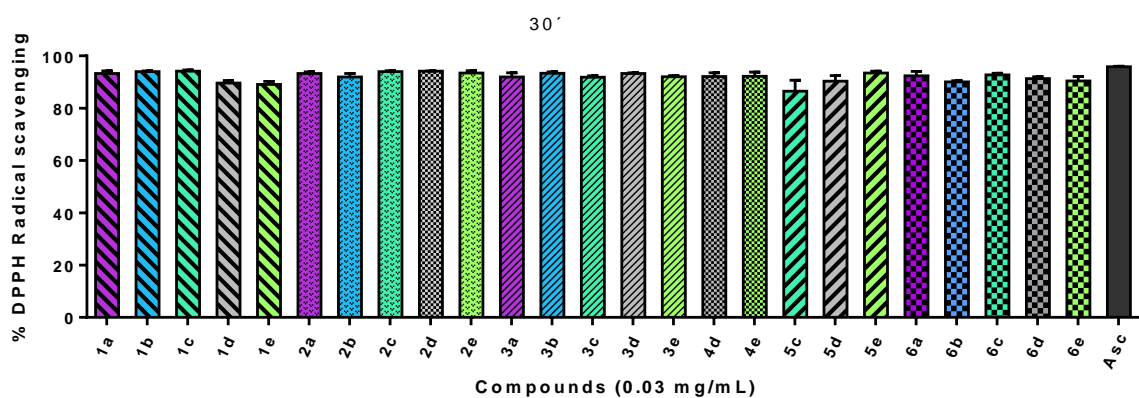

Figure S82. DPPH Radical scavenging activity at 0.03 mg/mL and after 30 minutes.

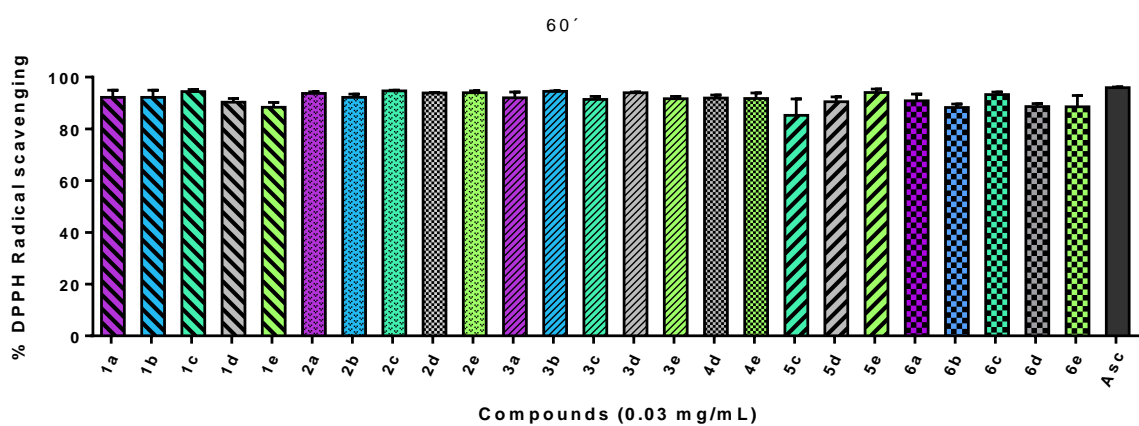

Figure S83. DPPH Radical scavenging activity at 0.03 mg/mL and after 60 minutes.

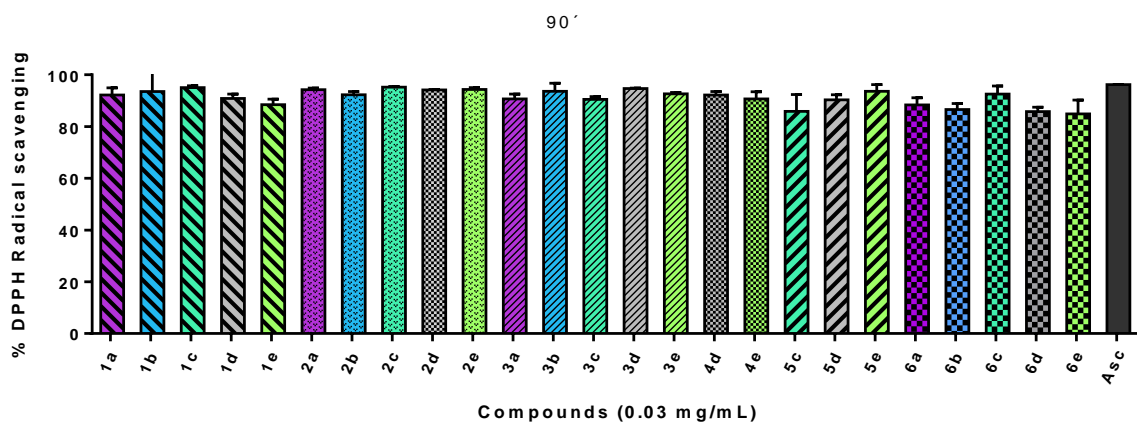

**Figure S84.** DPPH Radical scavenging activity at 0.03 mg/mL and after 90 minutes.

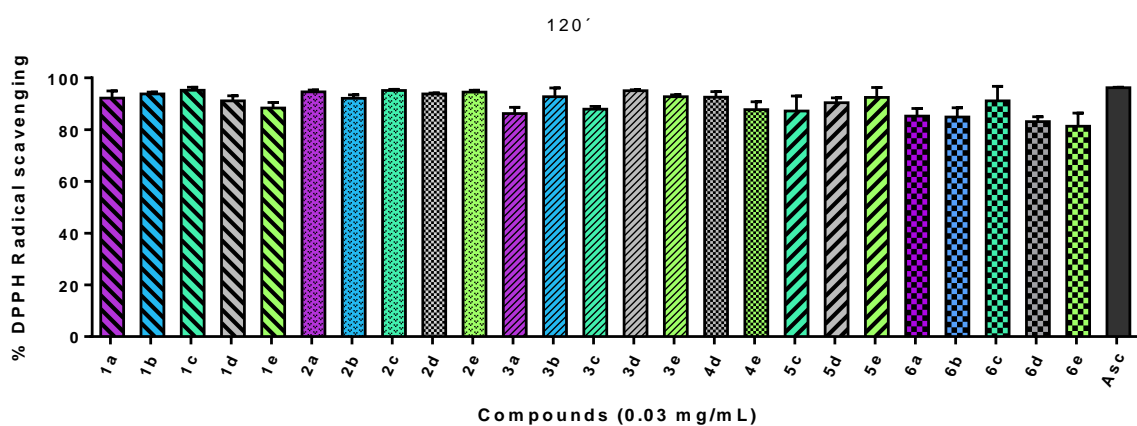

**Figure S85.** DPPH Radical scavenging activity at 0.03 mg/mL and after 120 minutes.

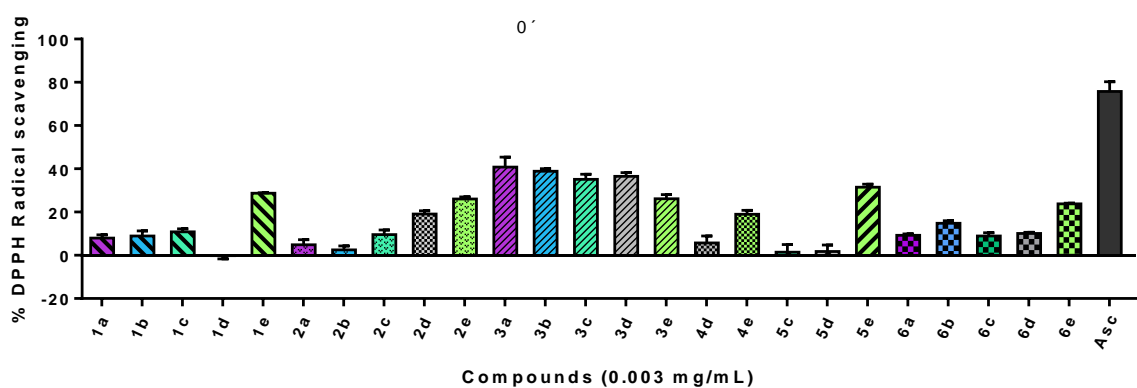

**Figure S86.** DPPH Radical scavenging activity at 0.003 mg/mL and after 0 minutes.

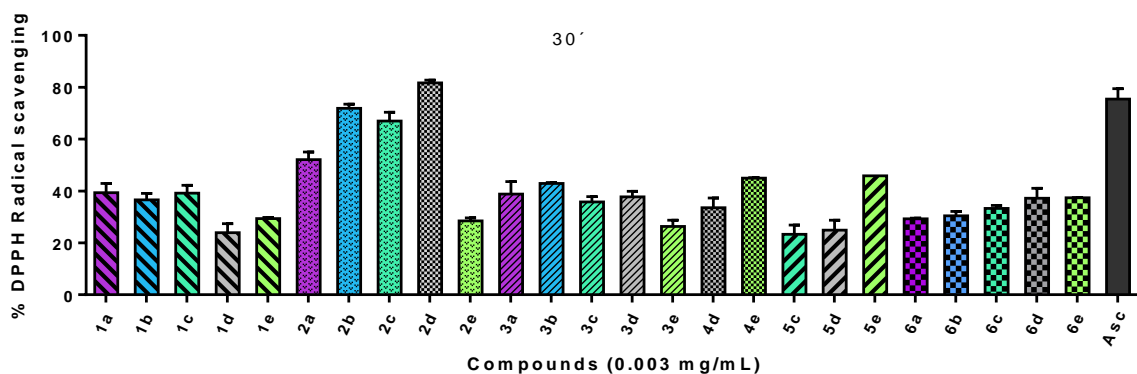

Figure S87. DPPH Radical scavenging activity at 0.003 mg/mL and after 30 minutes.

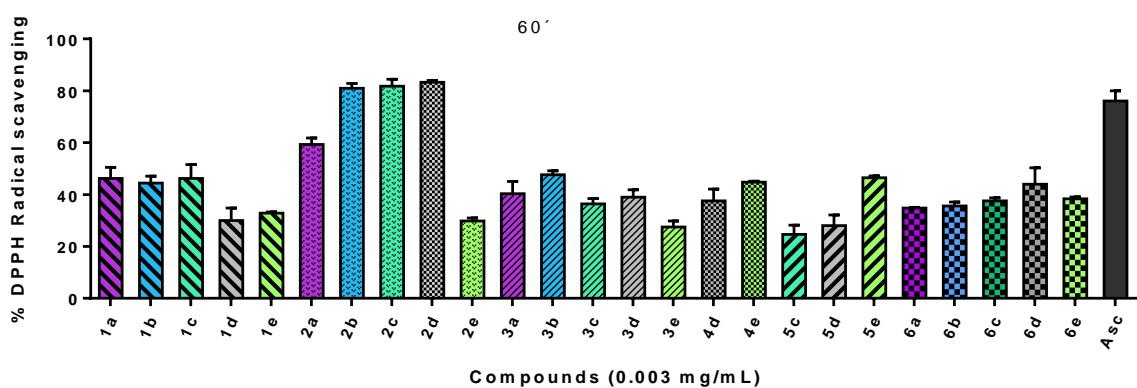

Figure S88. DPPH Radical scavenging activity at 0.003 mg/mL and after 60 minutes.

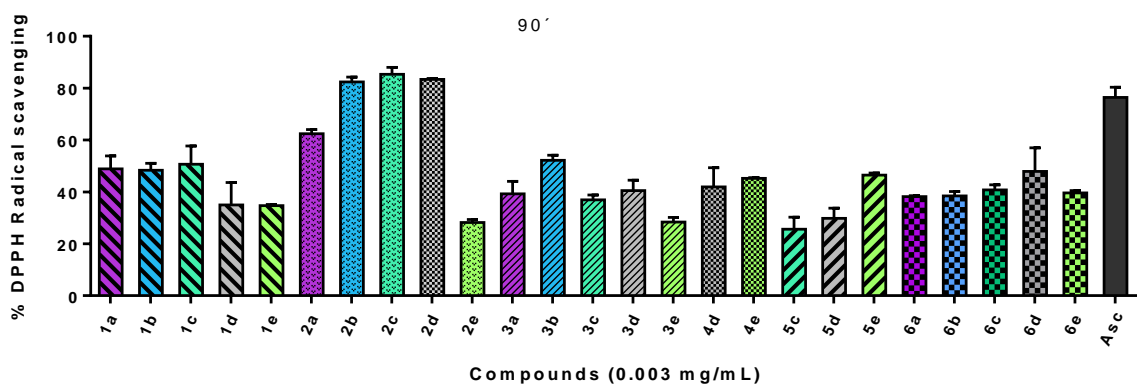

Figure S89. DPPH Radical scavenging activity at 0.003 mg/mL and after 90 minutes.

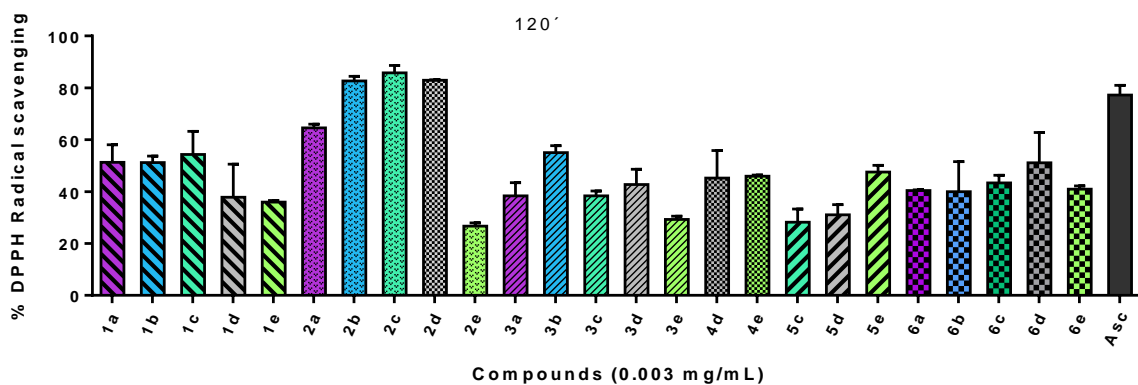

Figure S90. DPPH Radical scavenging activity at 0.003 mg/mL and after 120 minutes.

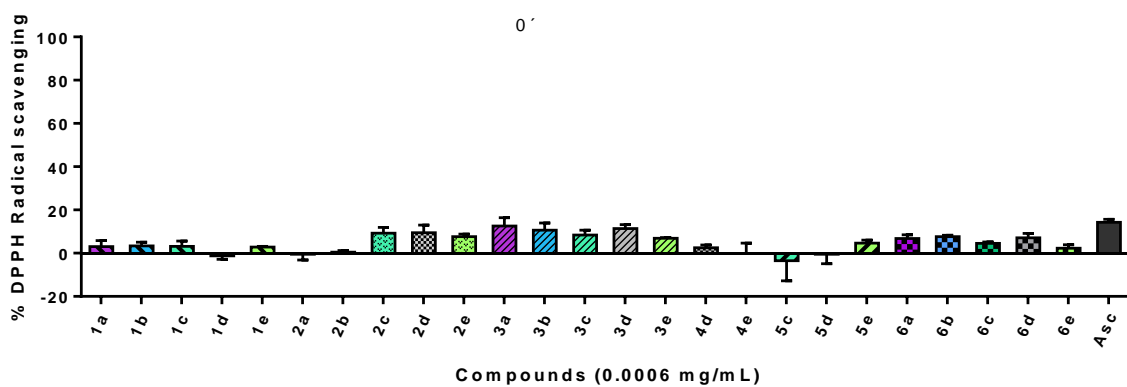

Figure S91. DPPH Radical scavenging activity at 0.0006 mg/mL and after 0 minutes.

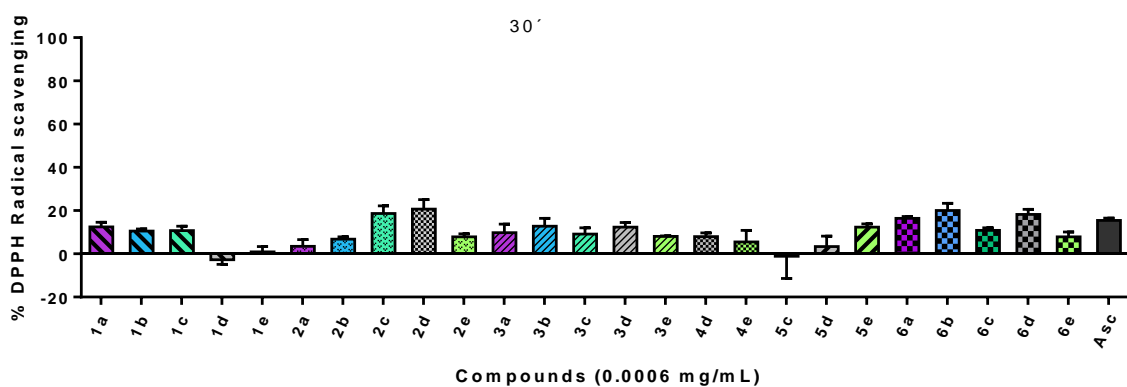

Figure S92. DPPH Radical scavenging activity at 0.0006 mg/mL and after 30 minutes.

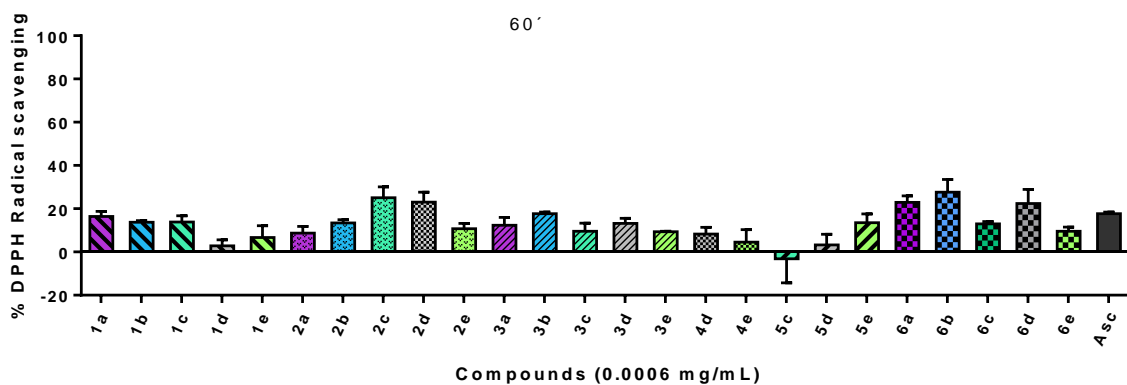

Figure S93. DPPH Radical scavenging activity at 0.0006 mg/mL and after 60 minutes.

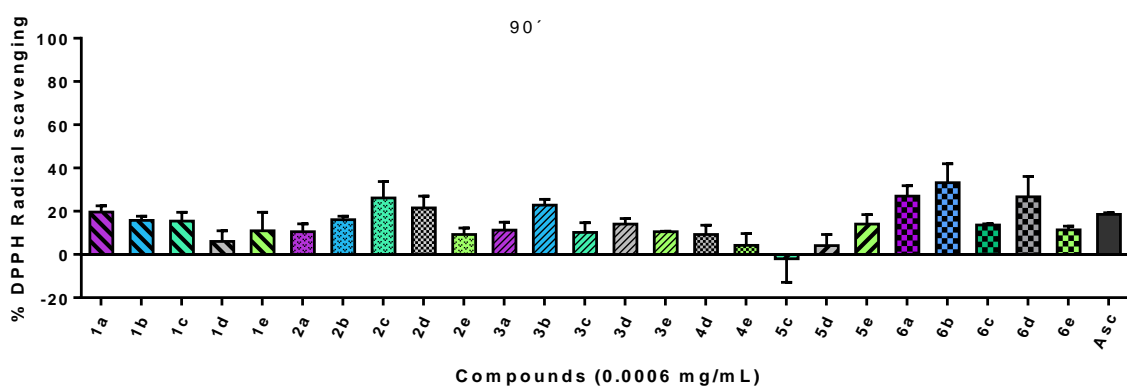

Figure S94. DPPH Radical scavenging activity at 0.0006 mg/mL and after 90 minutes.

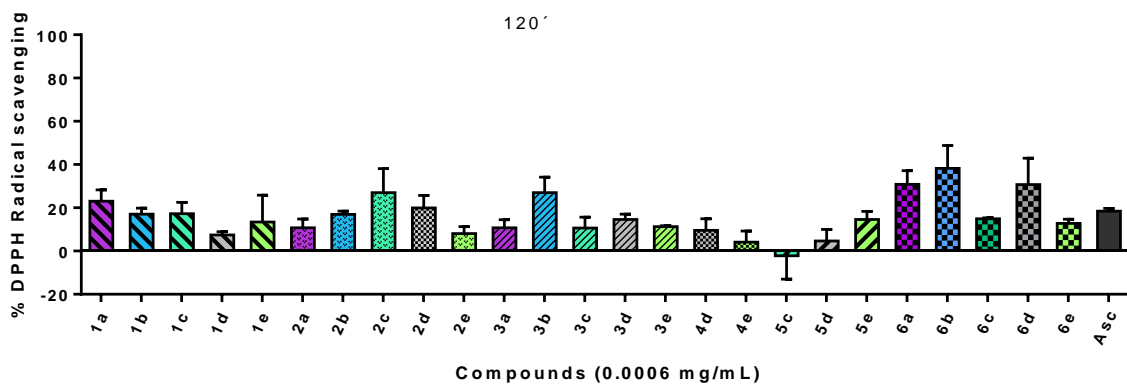

Figure S95. DPPH Radical scavenging activity at 0.0006 mg/mL and after 120 minutes.

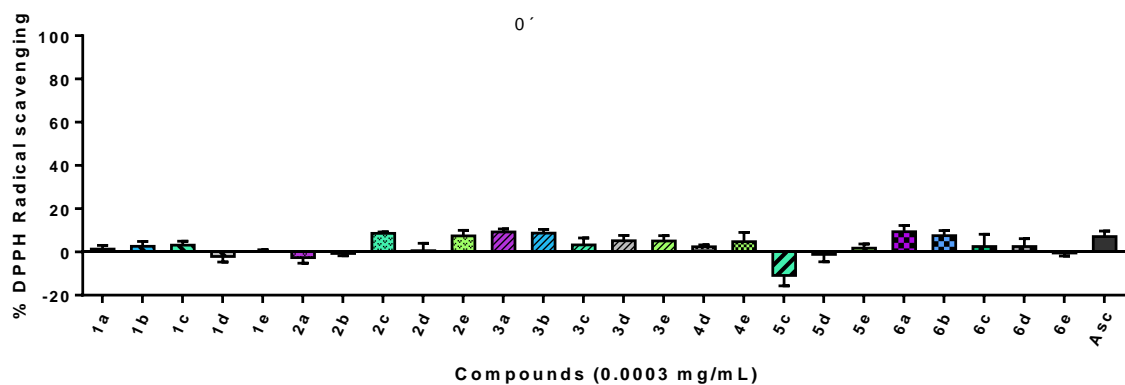

Figure S96. DPPH Radical scavenging activity at 0.0003 mg/mL and after 0 minutes.

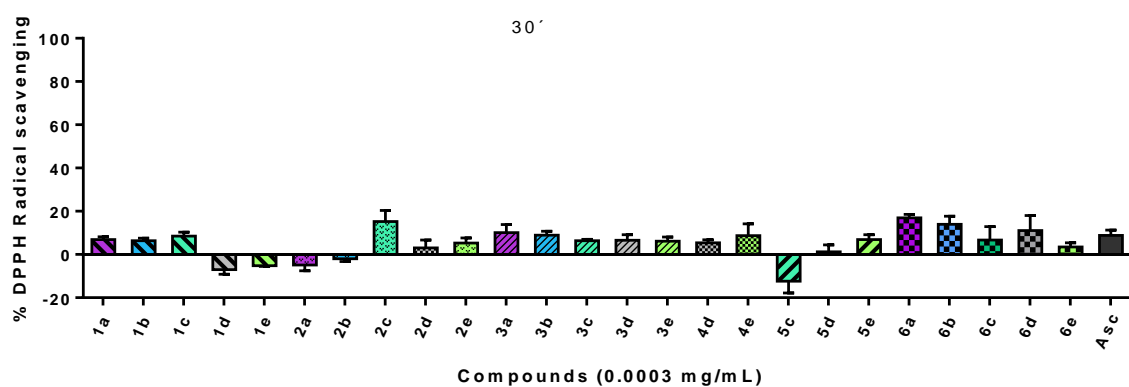

Figure S97. DPPH Radical scavenging activity at 0.0003 mg/mL and after 30 minutes.

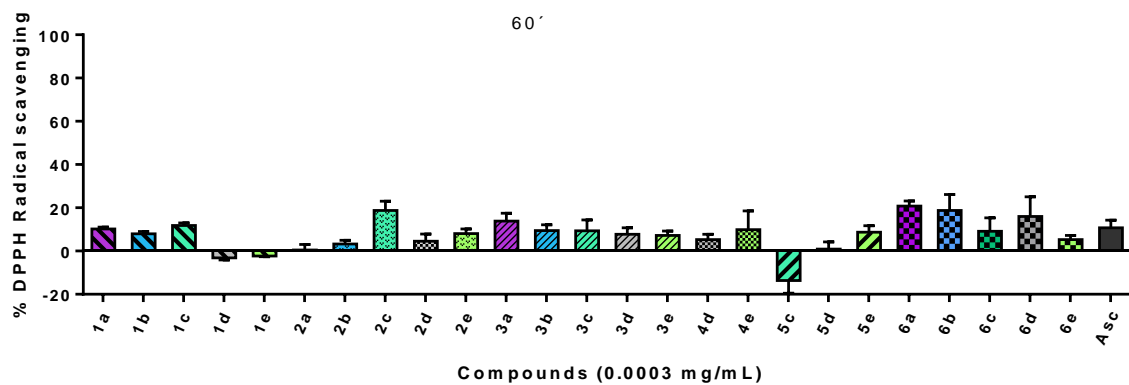

Figure S98. DPPH Radical scavenging activity at 0.0003 mg/mL and after 60 minutes.

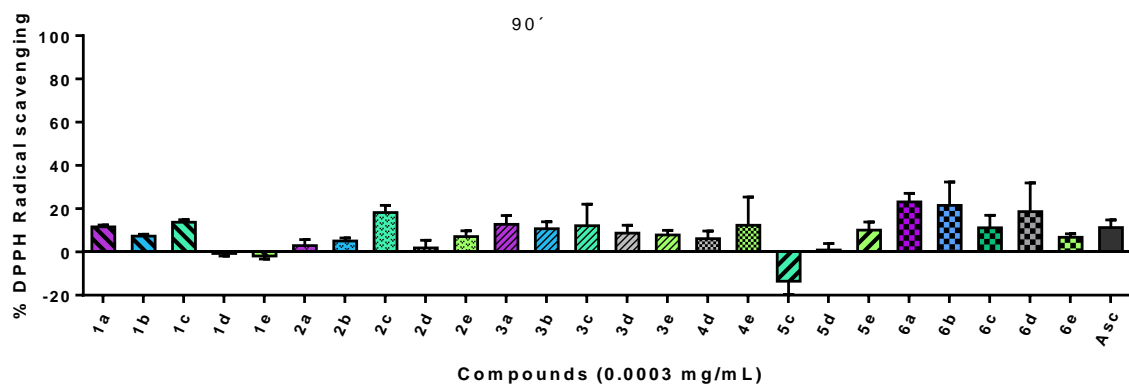

Figure S99. DPPH Radical scavenging activity at 0.0003 mg/mL and after 90 minutes.

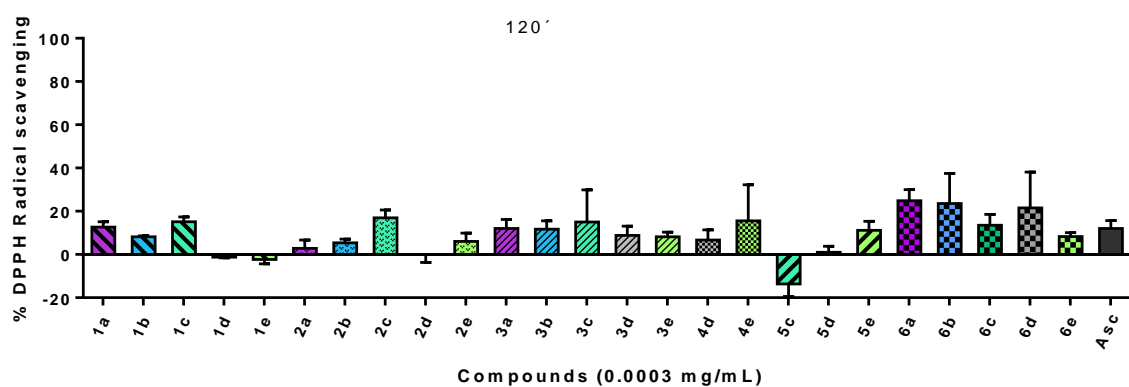

Figure S100. DPPH Radical scavenging activity at 0.0006 mg/mL and after 120 minutes.

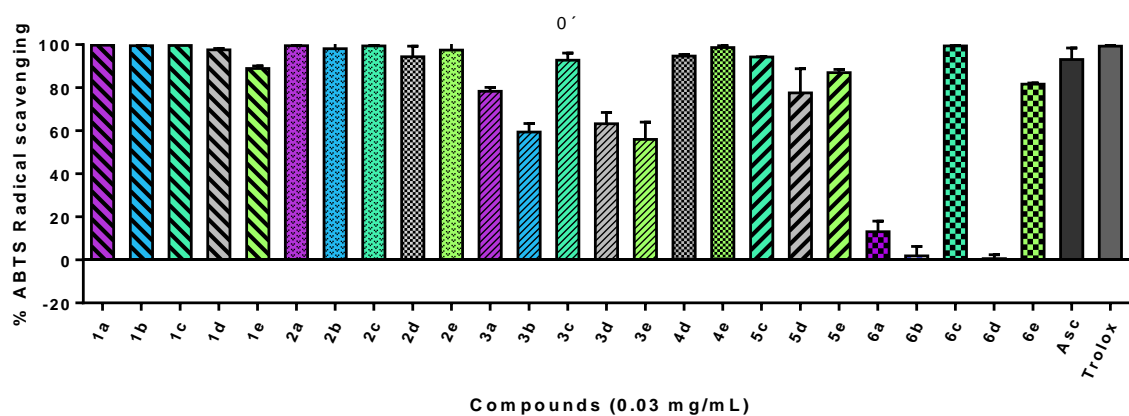

Figure S101. ABTS Radical scavenging activity at 0.03 mg/mL and after 0 minutes.



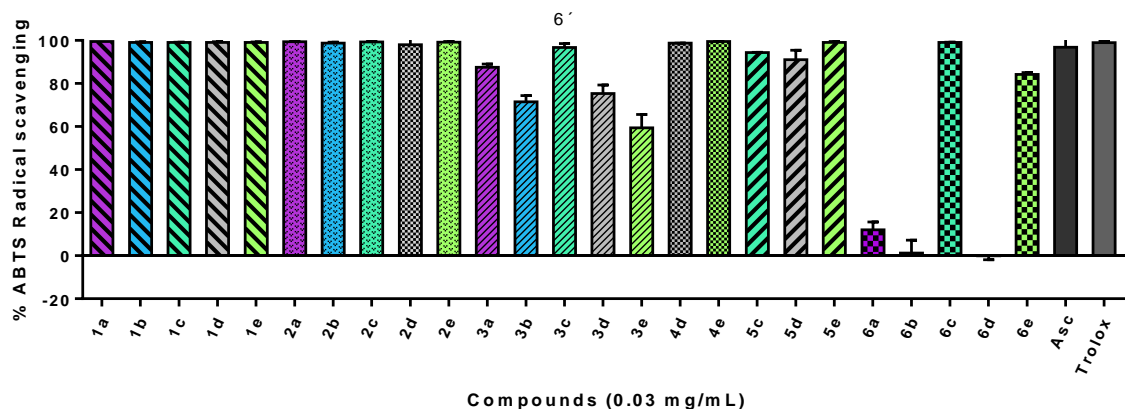

Figure S102. ABTS Radical scavenging activity at 0.03 mg/mL and after 6 minutes.

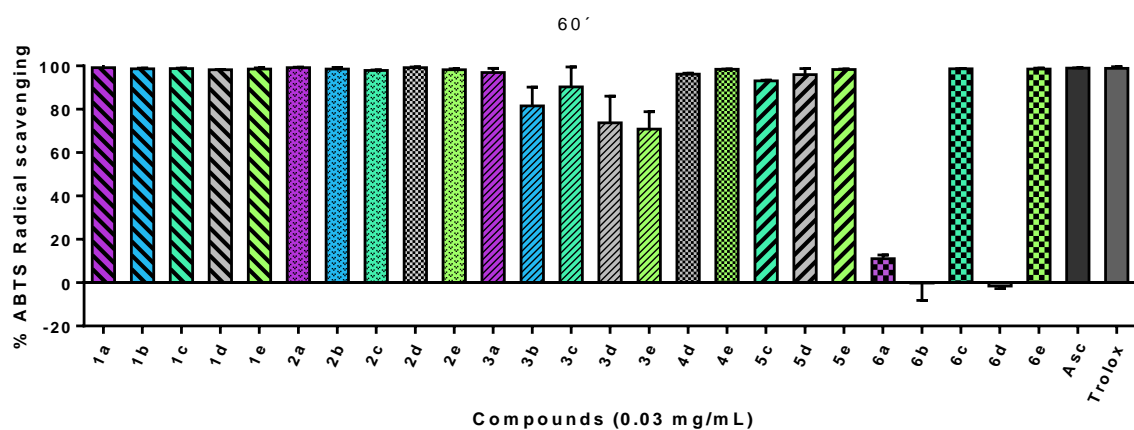

Figure S103. ABTS Radical scavenging activity at 0.03 mg/mL and after 60 minutes.

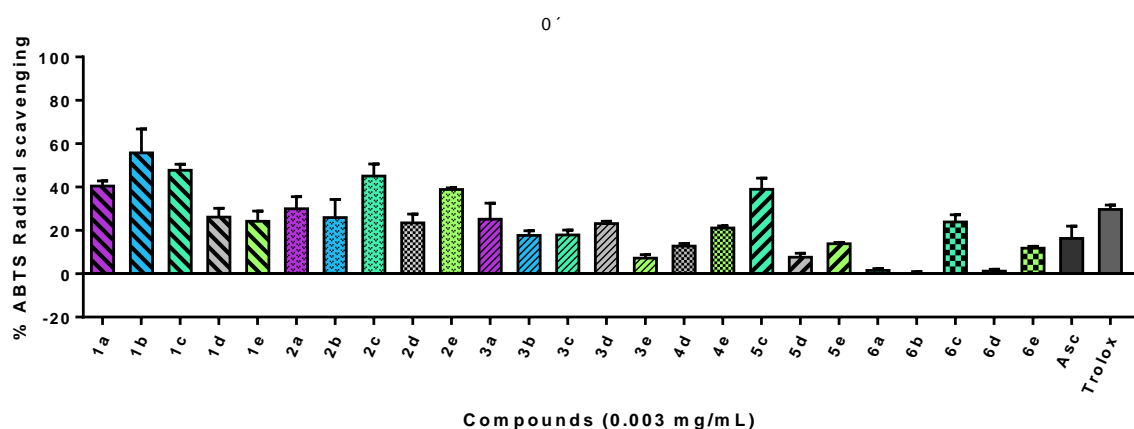

Figure S104. ABTS Radical scavenging activity at 0.003 mg/mL and after 0 minutes.

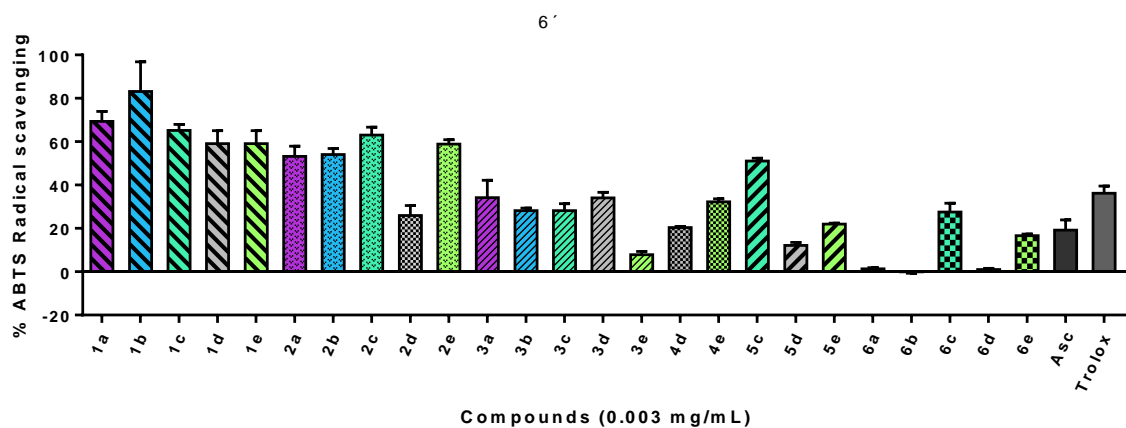

**Figure S105.** ABTS Radical scavenging activity at 0.003 mg/mL and after 6 minutes.

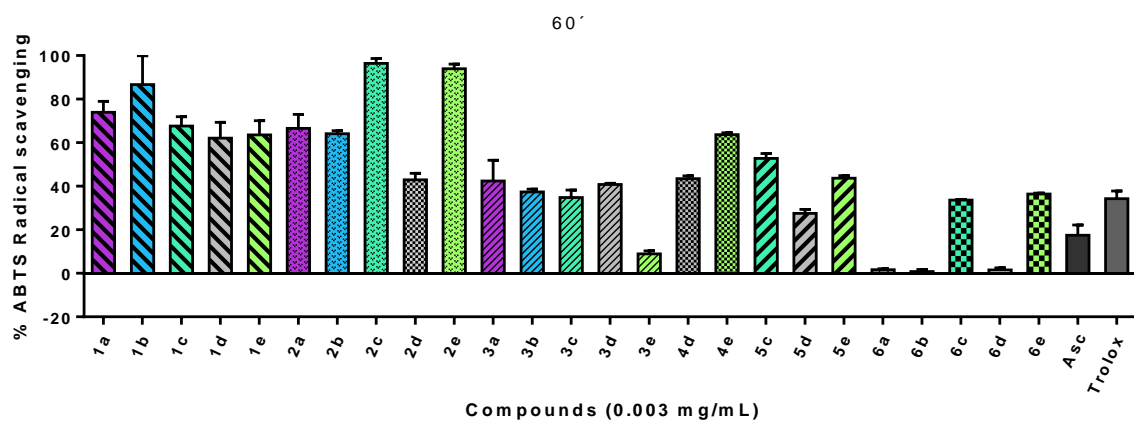

**Figure S106.** ABTS Radical scavenging activity at 0.003 mg/mL and after 60 minutes.
